# Supplementary material
Source: publisher figshare collection journal article supplement (https://brill.figshare.com/articles/dataset/_/1564714)
Supplement: Supplementary file 1 [file 1]

## Please fill this form:

name:

age:

gender: male/female

date:

place:

spectacles/lenses: YES/NO

I consent that my data will  
be used in publication  
(anonymously): YES/NO

Signature:

.....

## Instructions

You will be presented with some pages, each showing three images A, B, C.

Although the images initially look similar, they are really different. Look at them intently before you make up your mind in responding.

Try to imagine yourself present in the scene. You are asked to indicate which of the images A, B, C gives you the strongest feeling of "being present" in the scene.

Indicate your preference by encircling the appropriate letter (A, B, or C) in the box at the lower right corner of the page.

Then move on to the next page until finished.



A

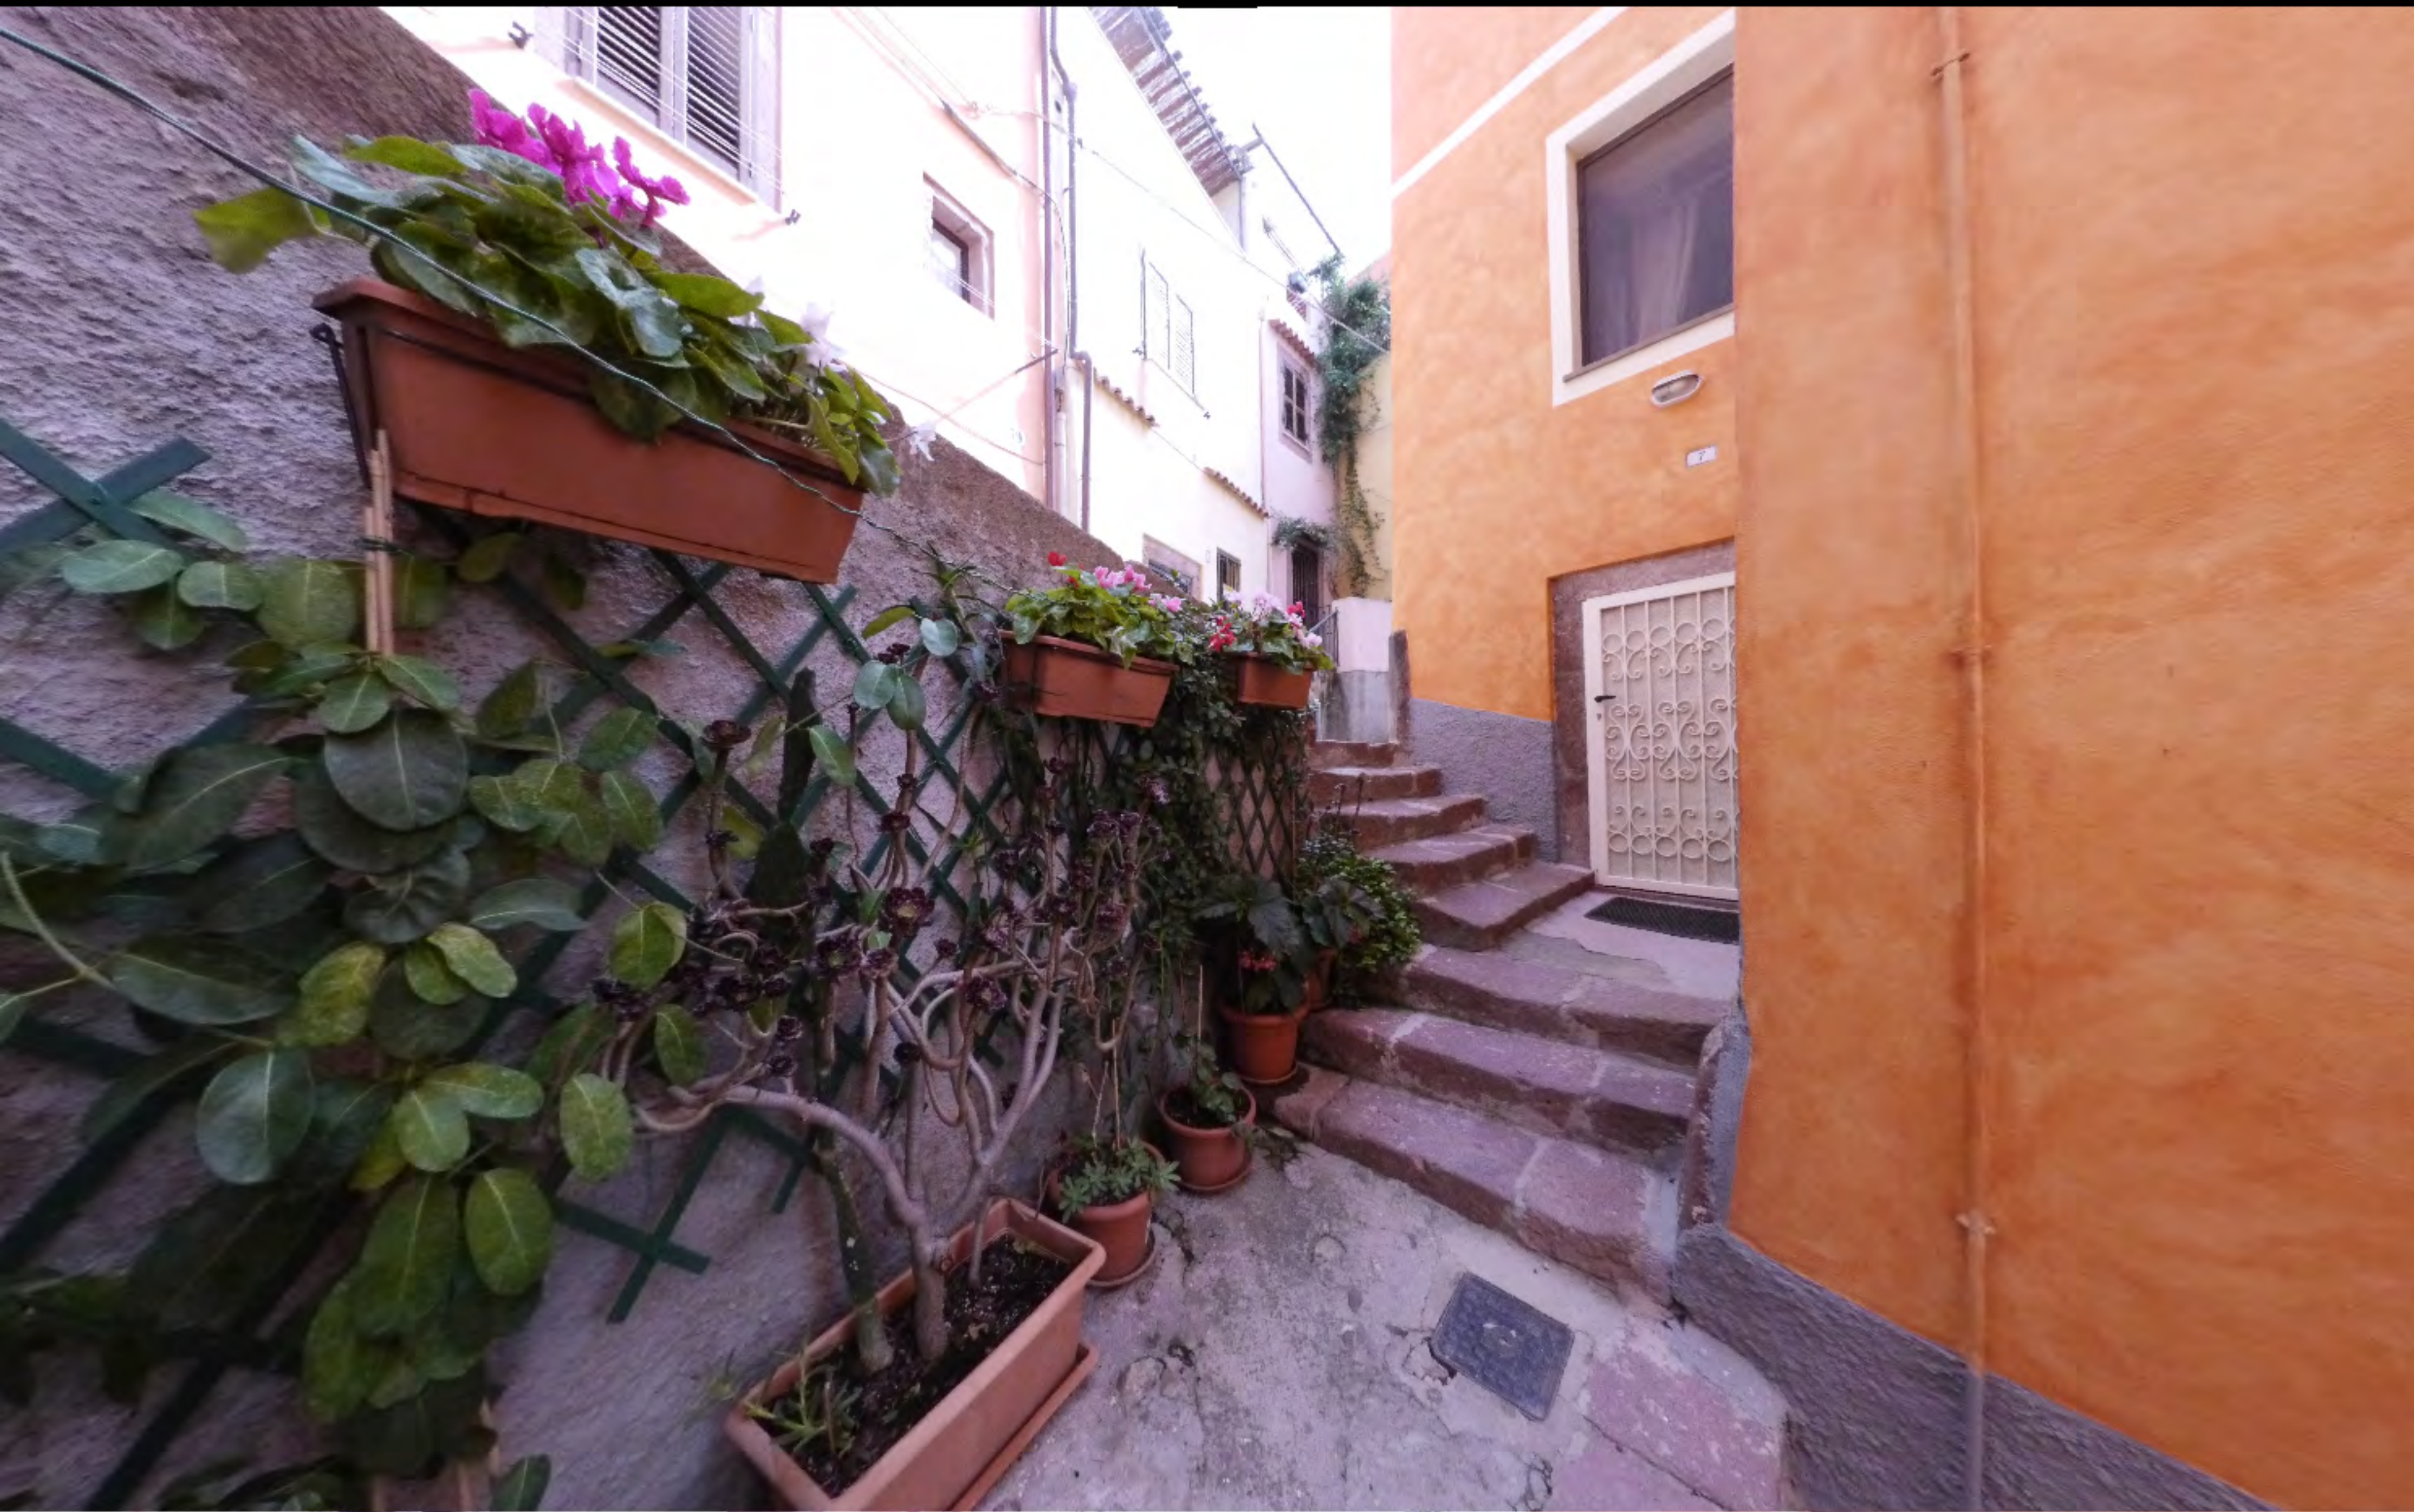

B

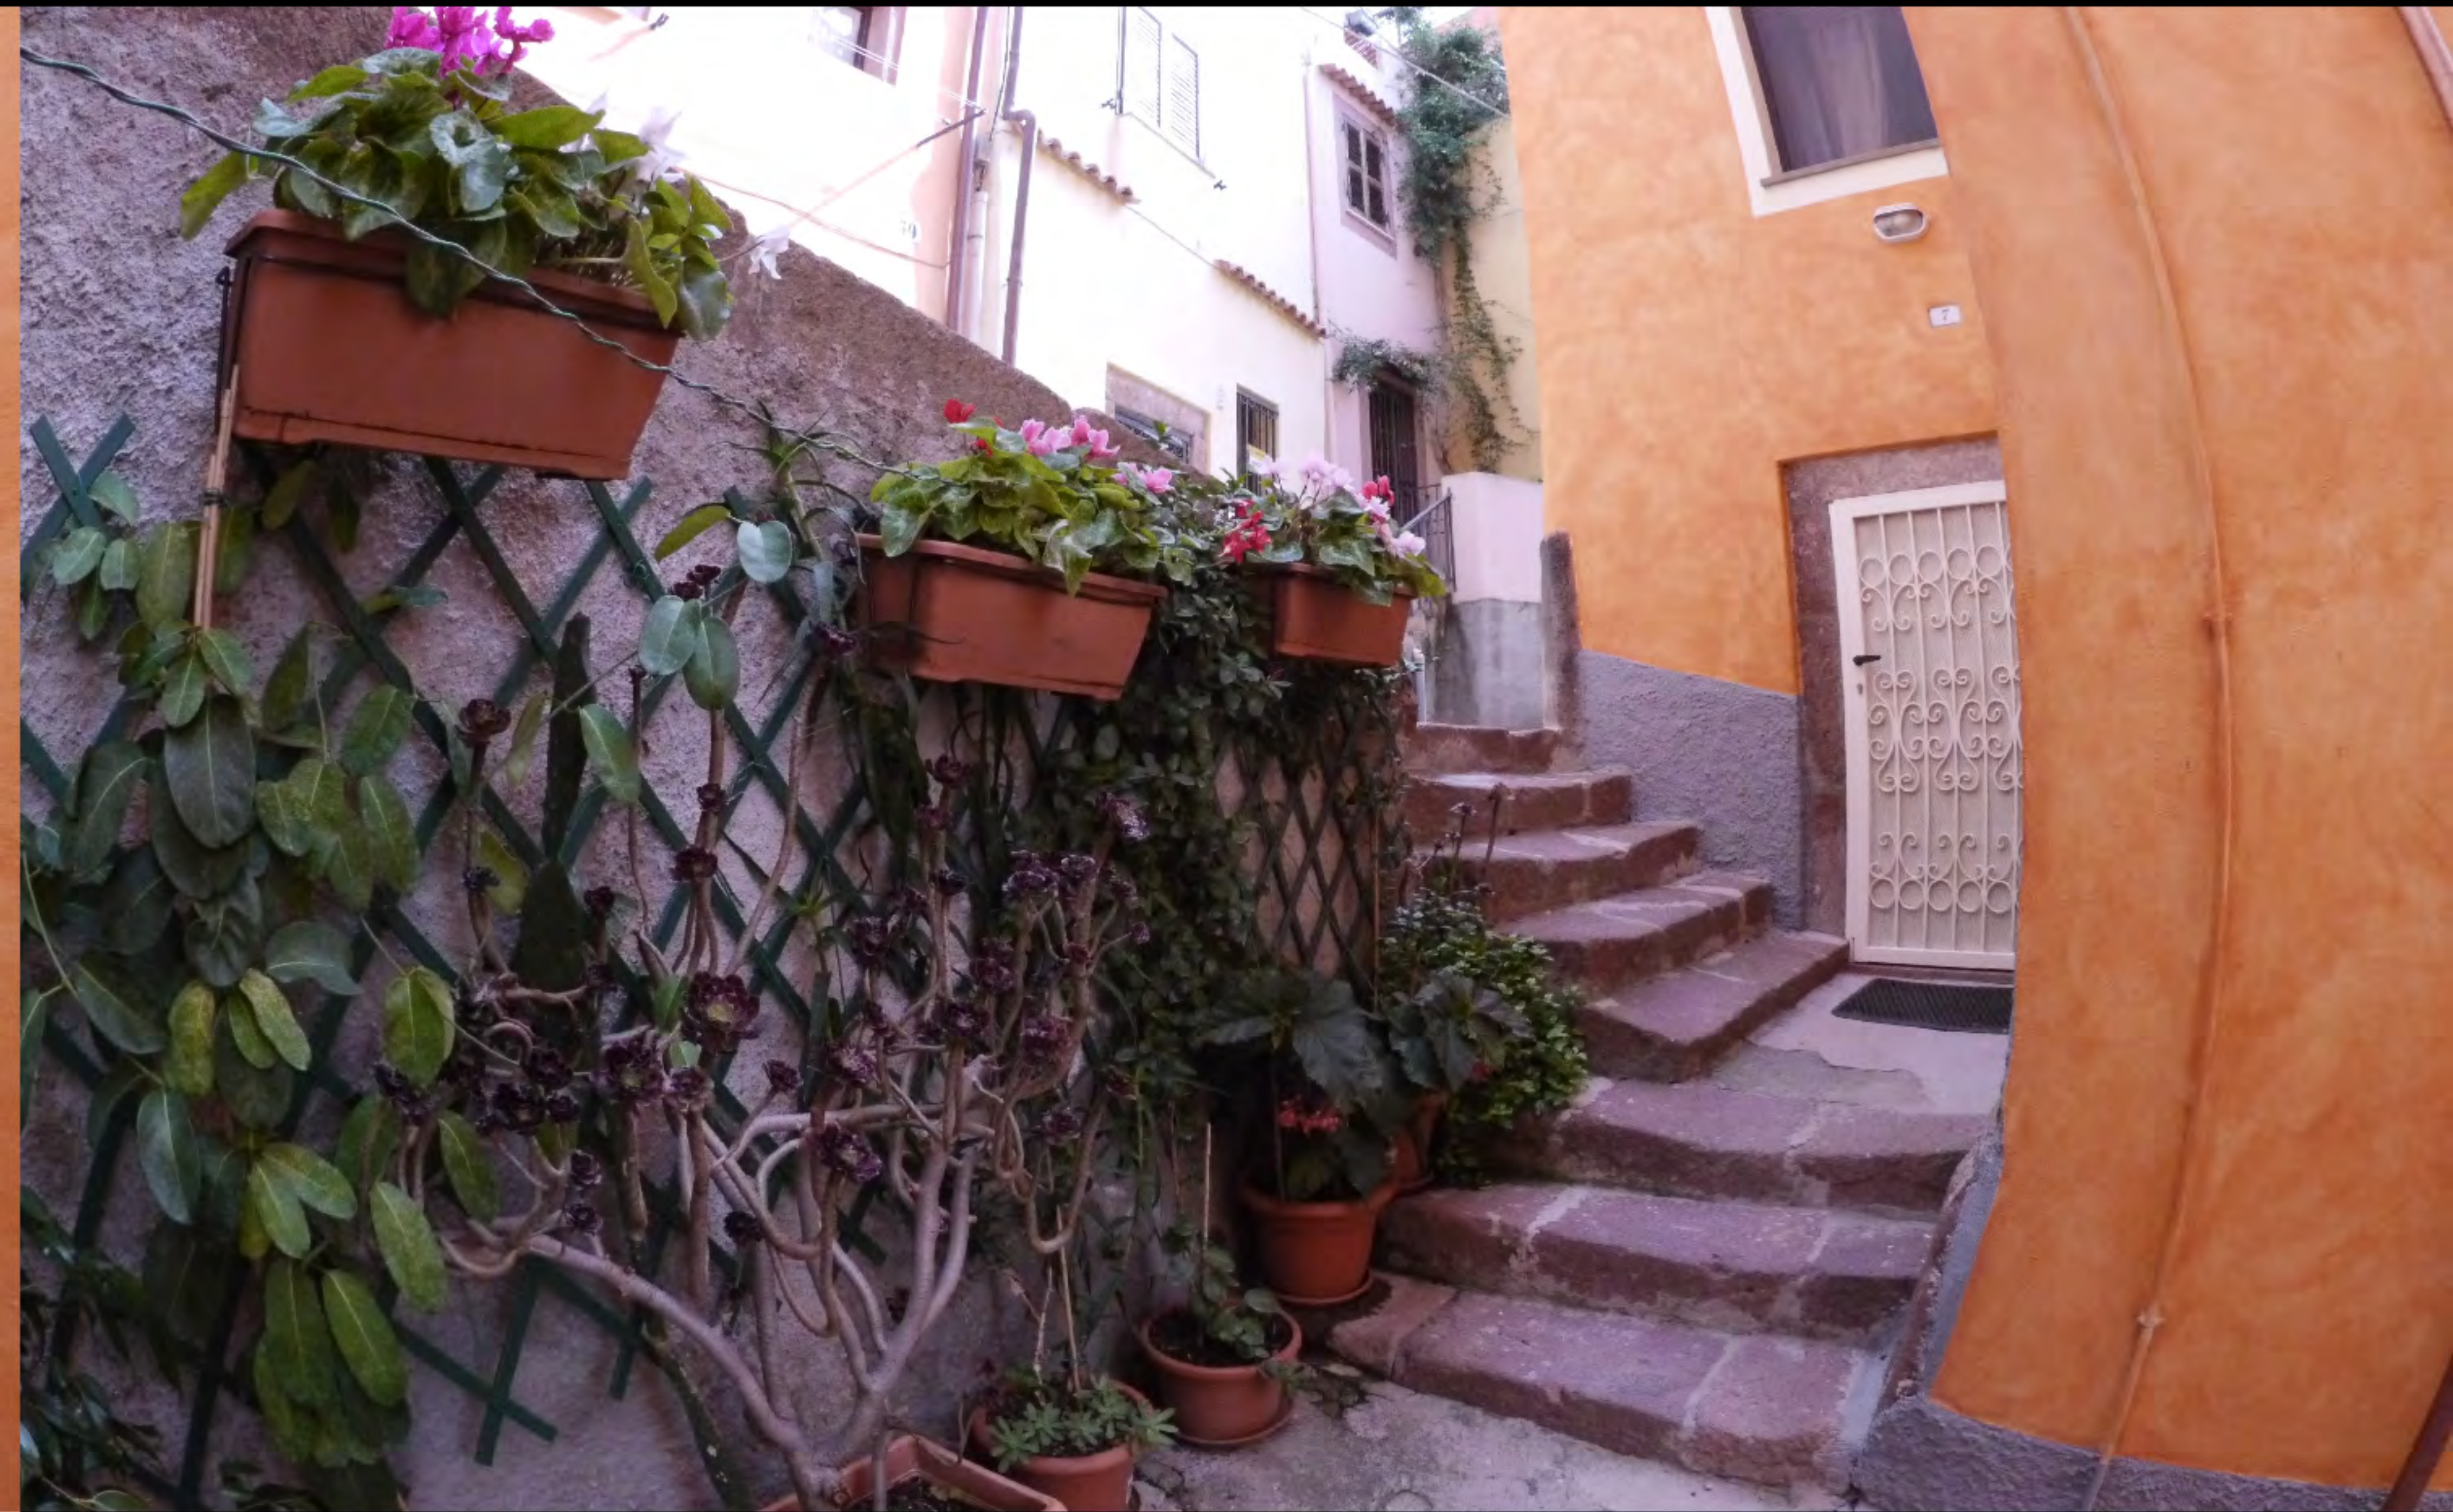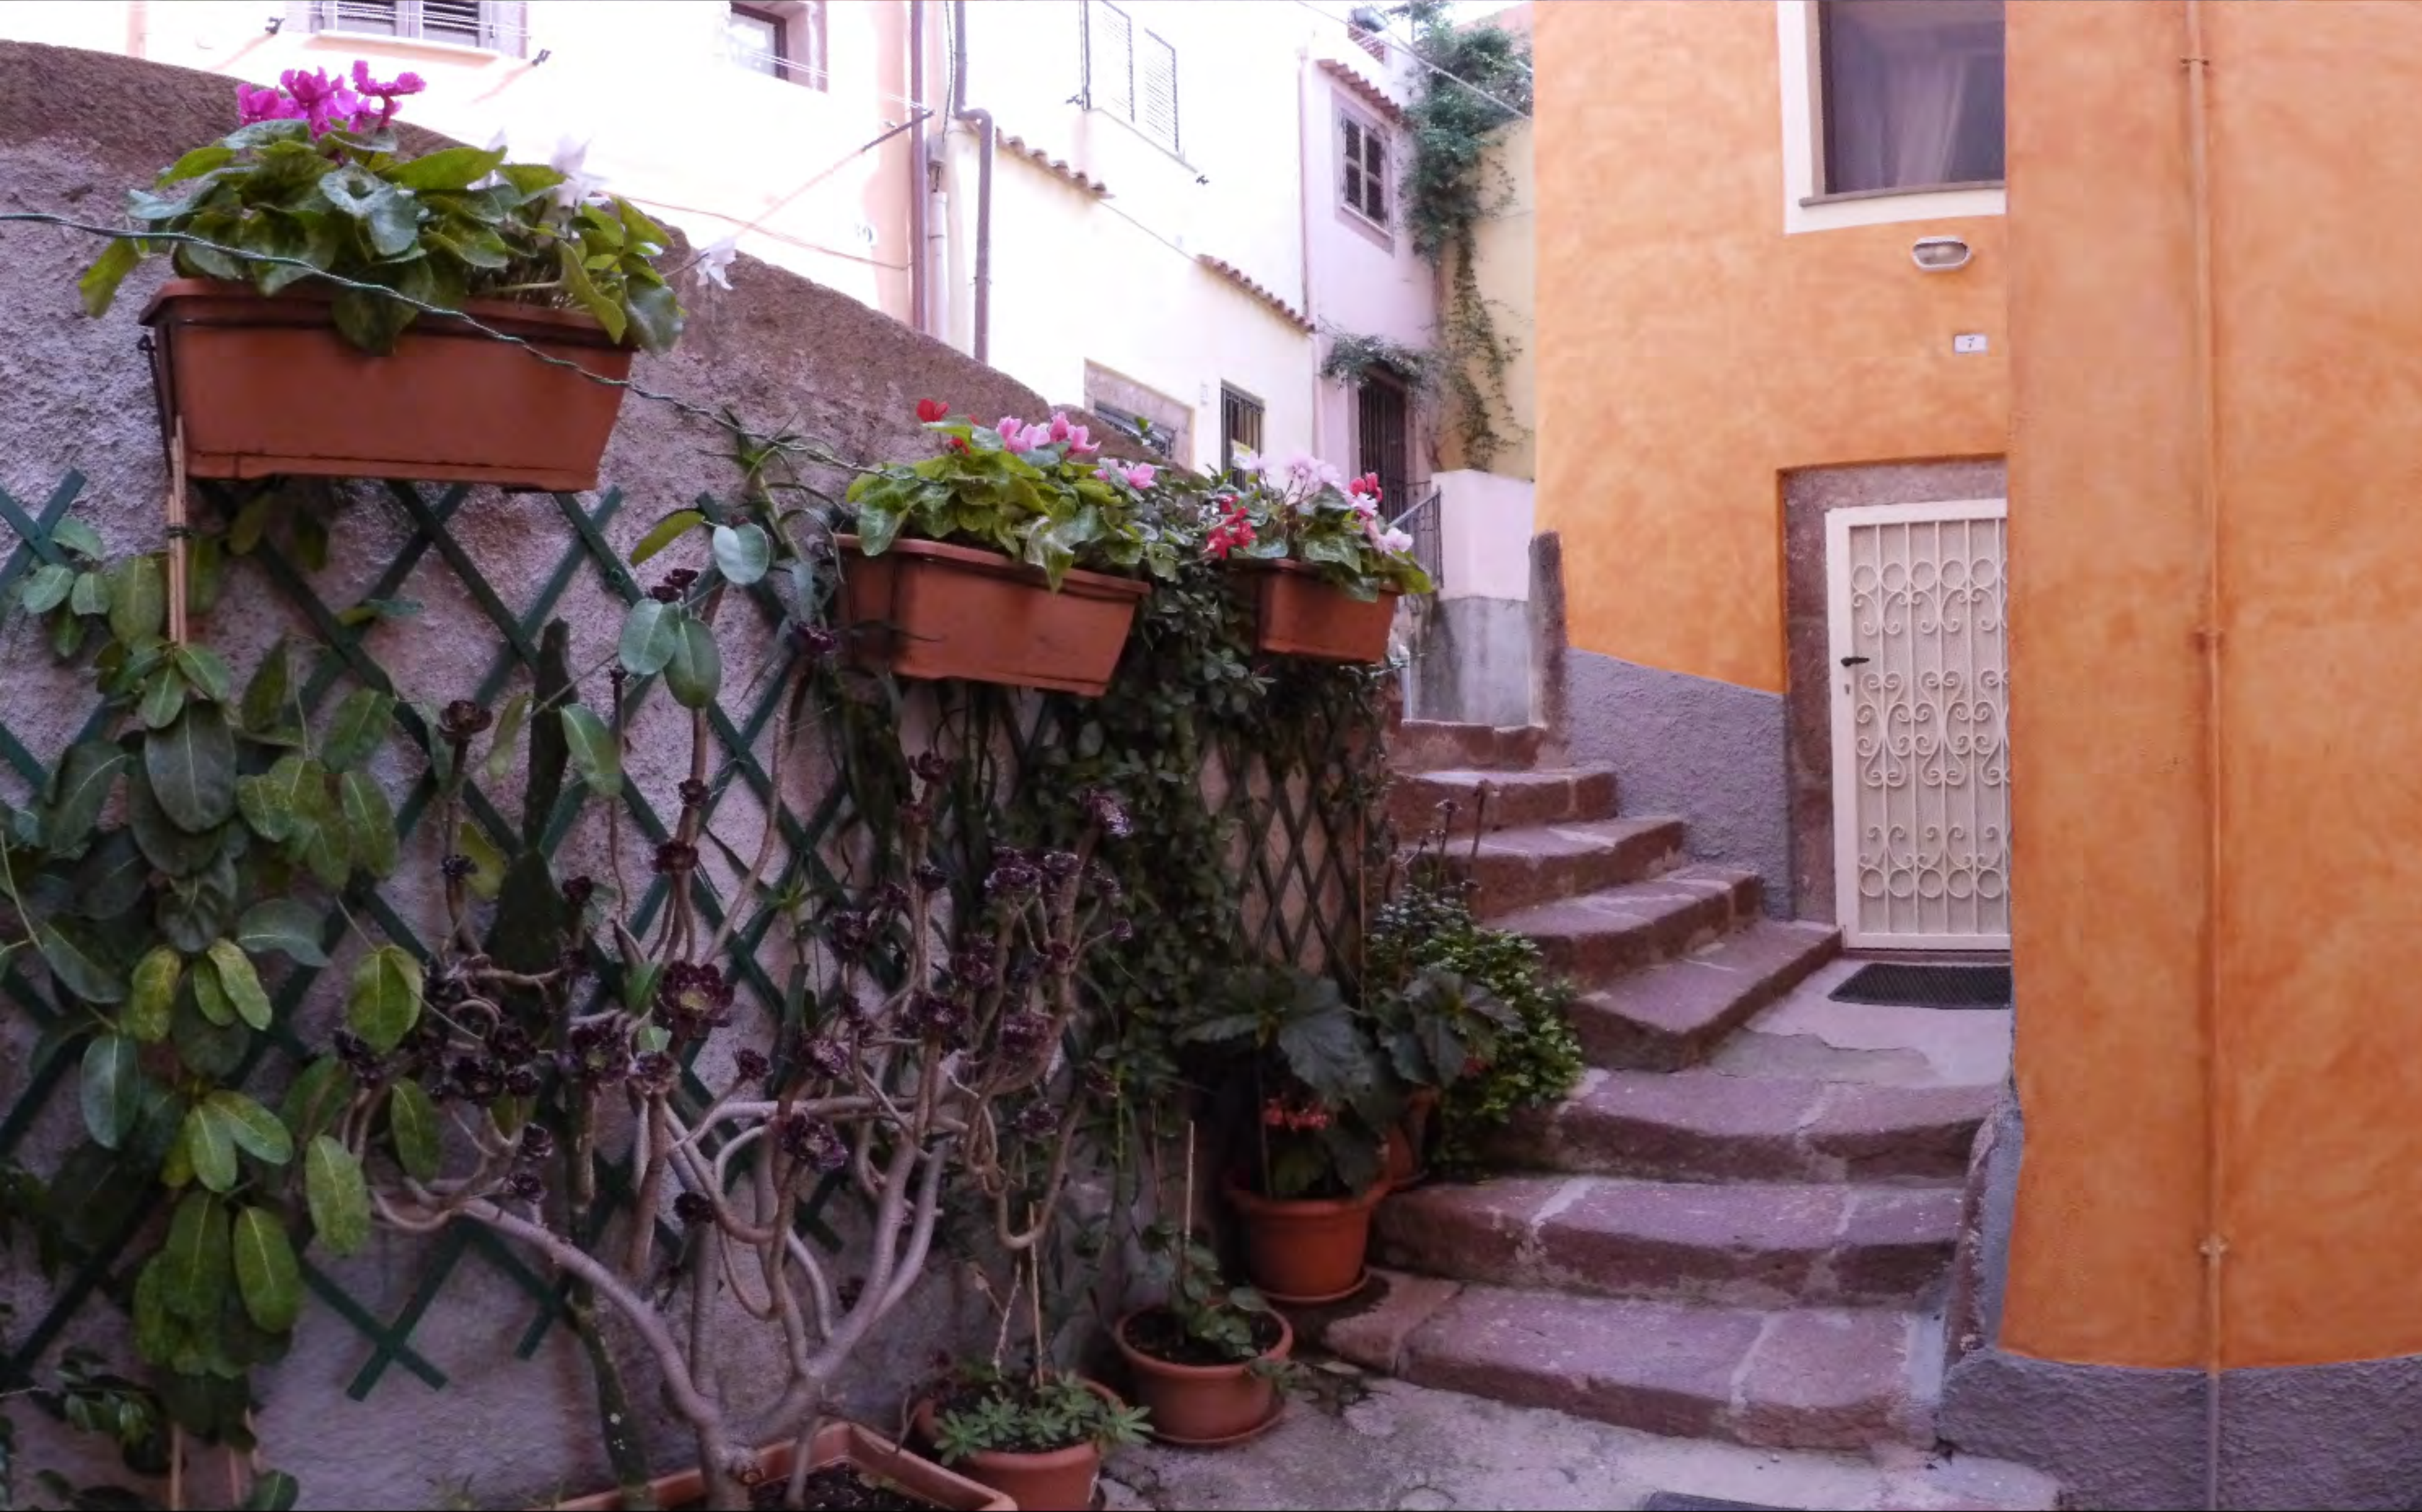

C

|   |   |
|---|---|
| A | B |
| C |   |



A

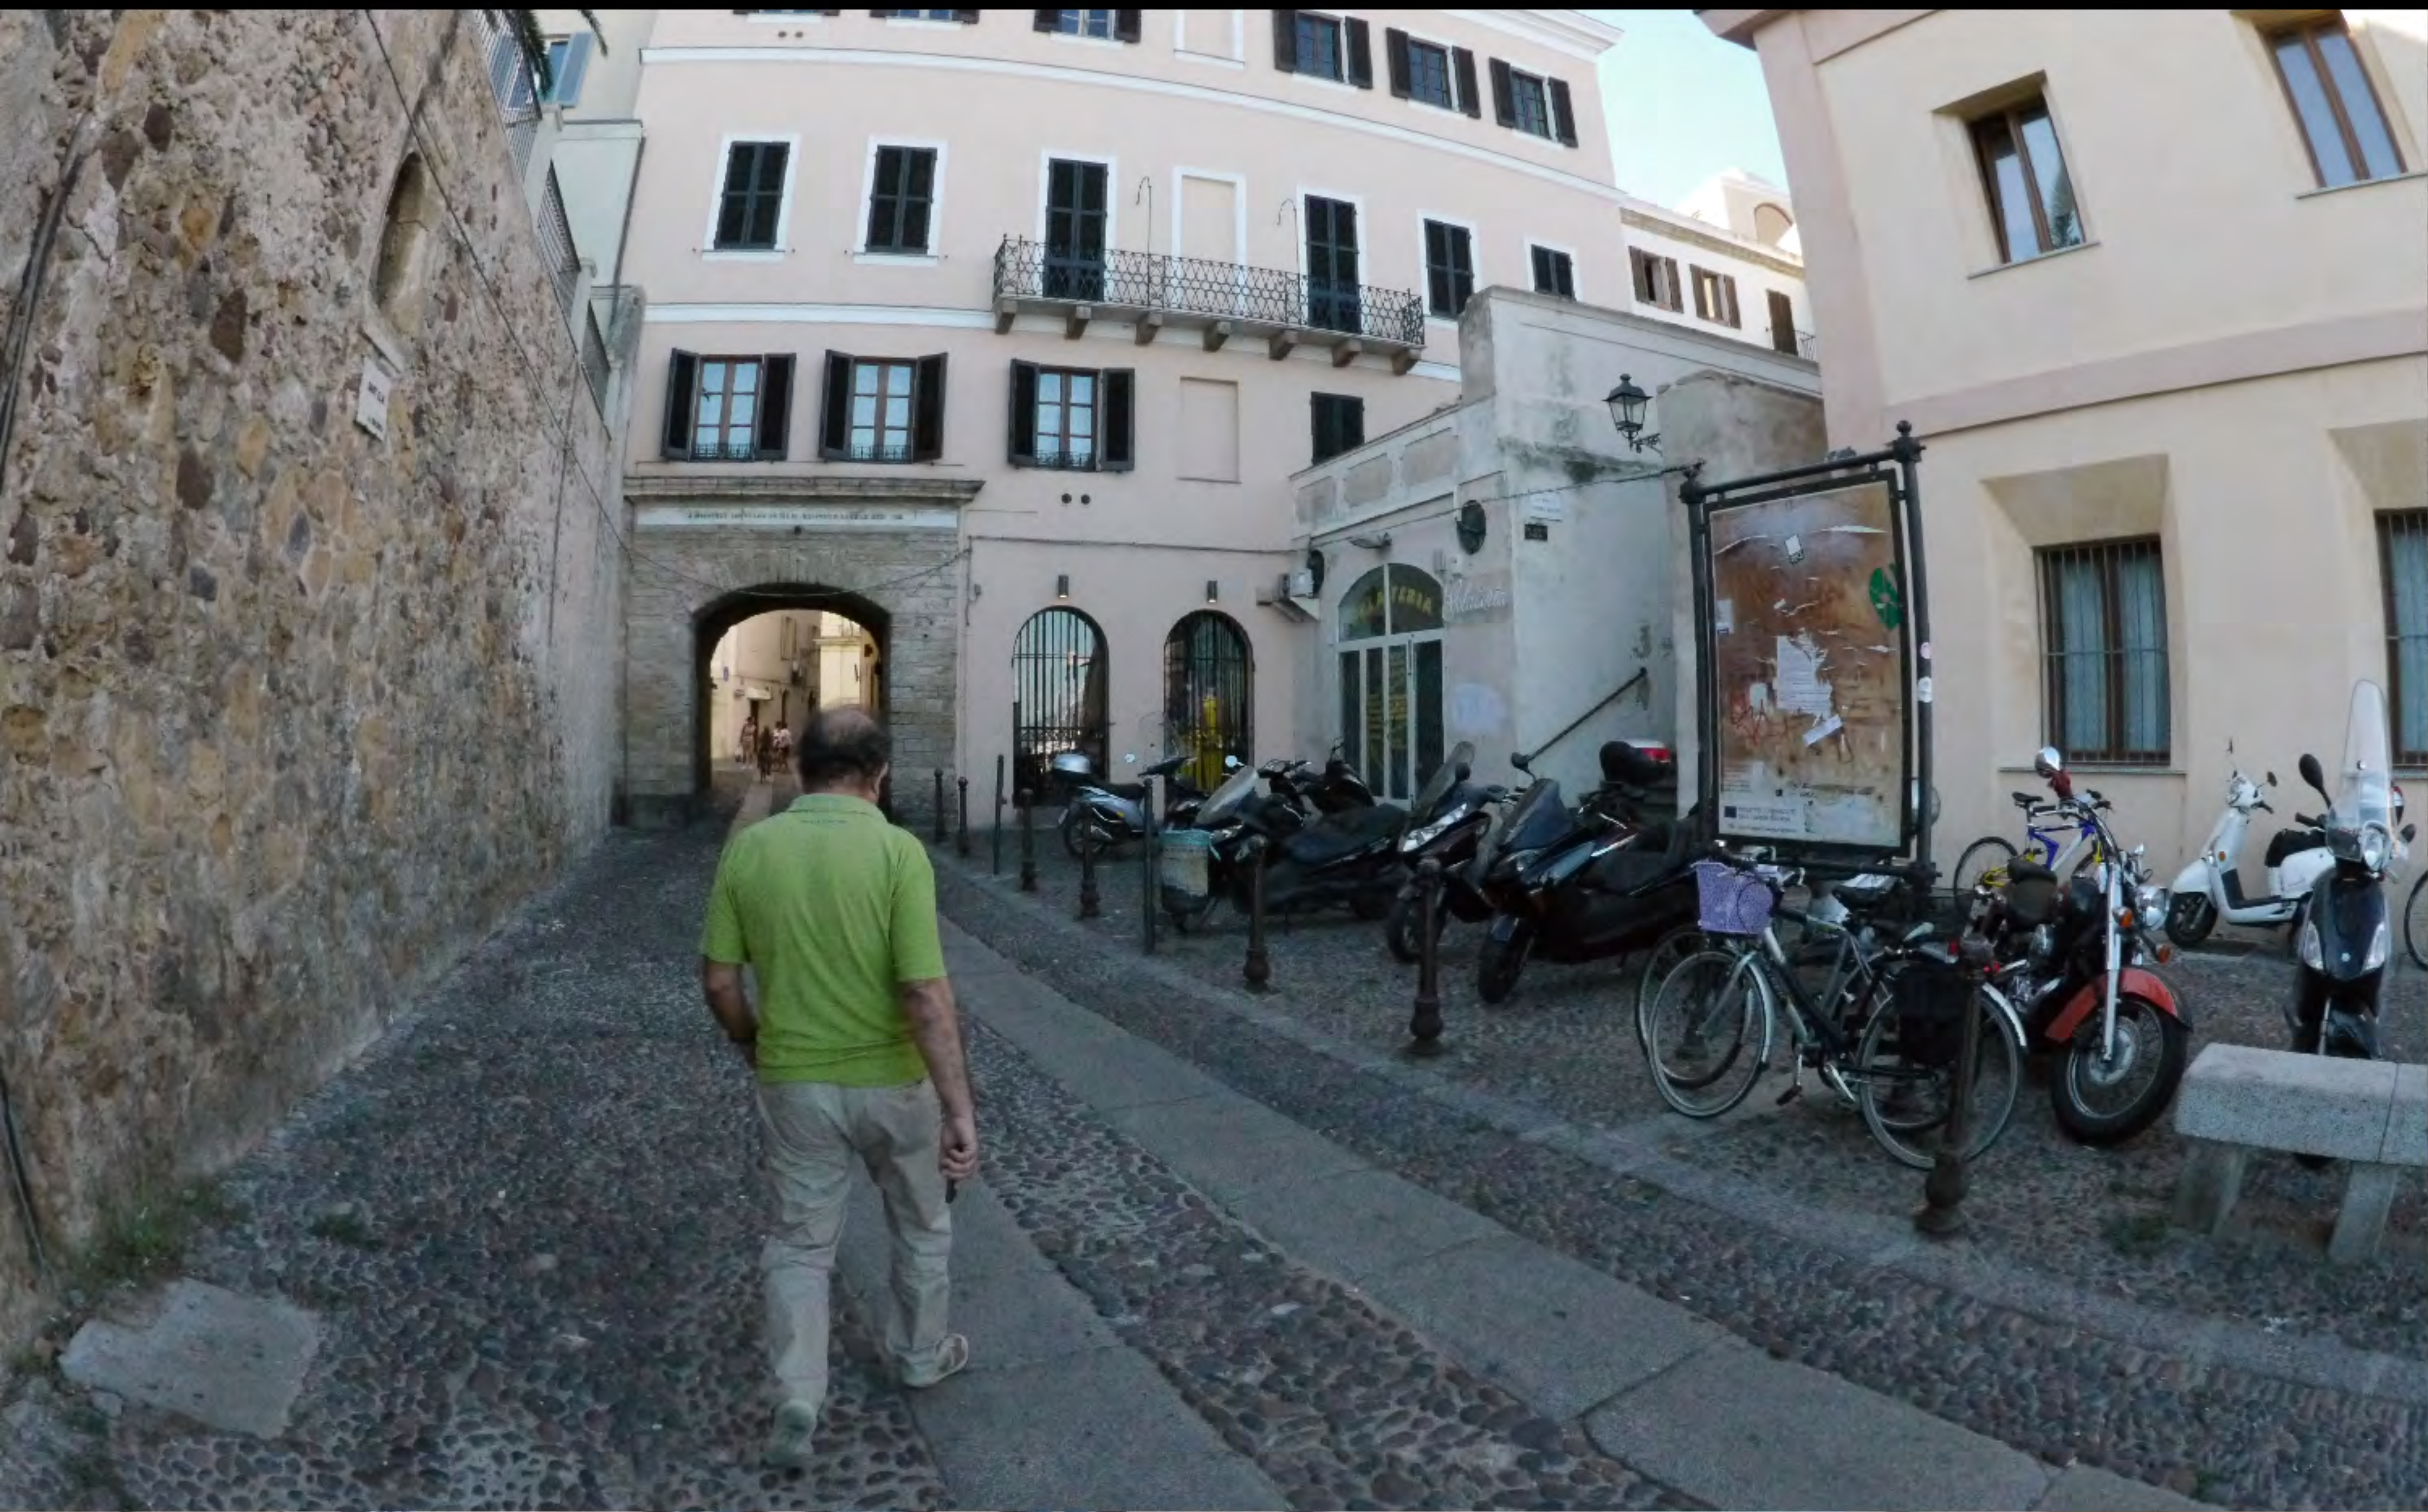

B

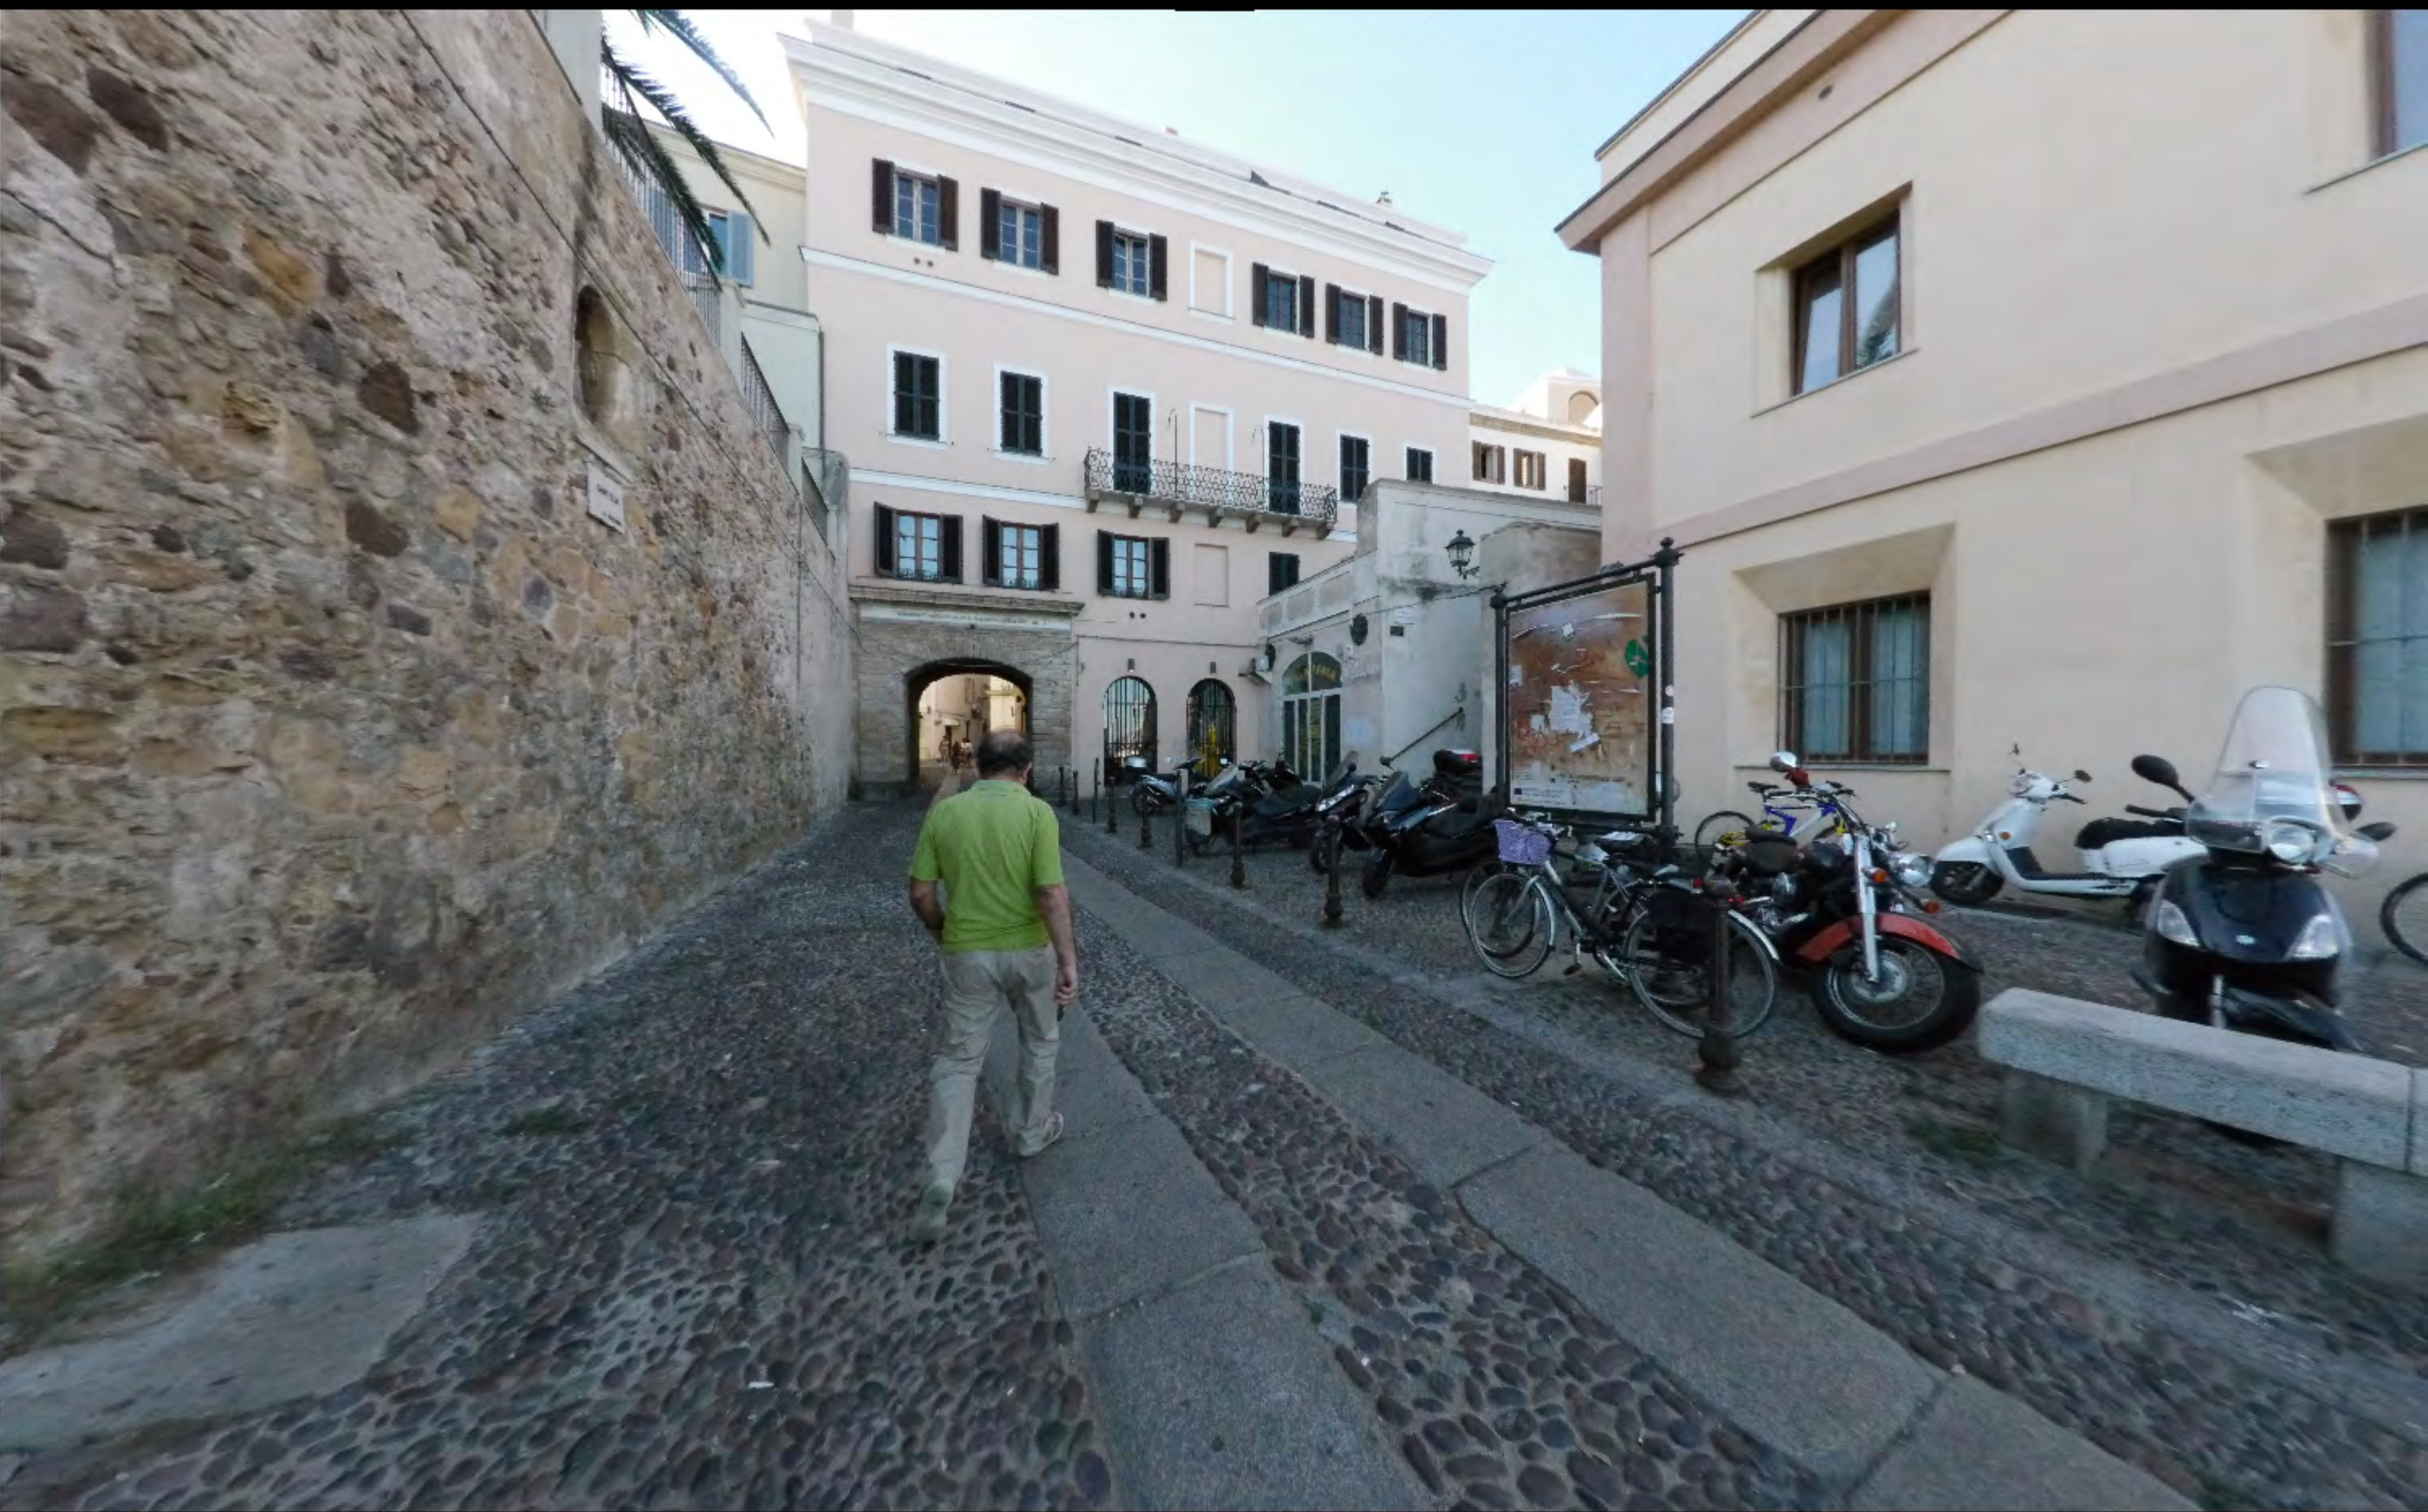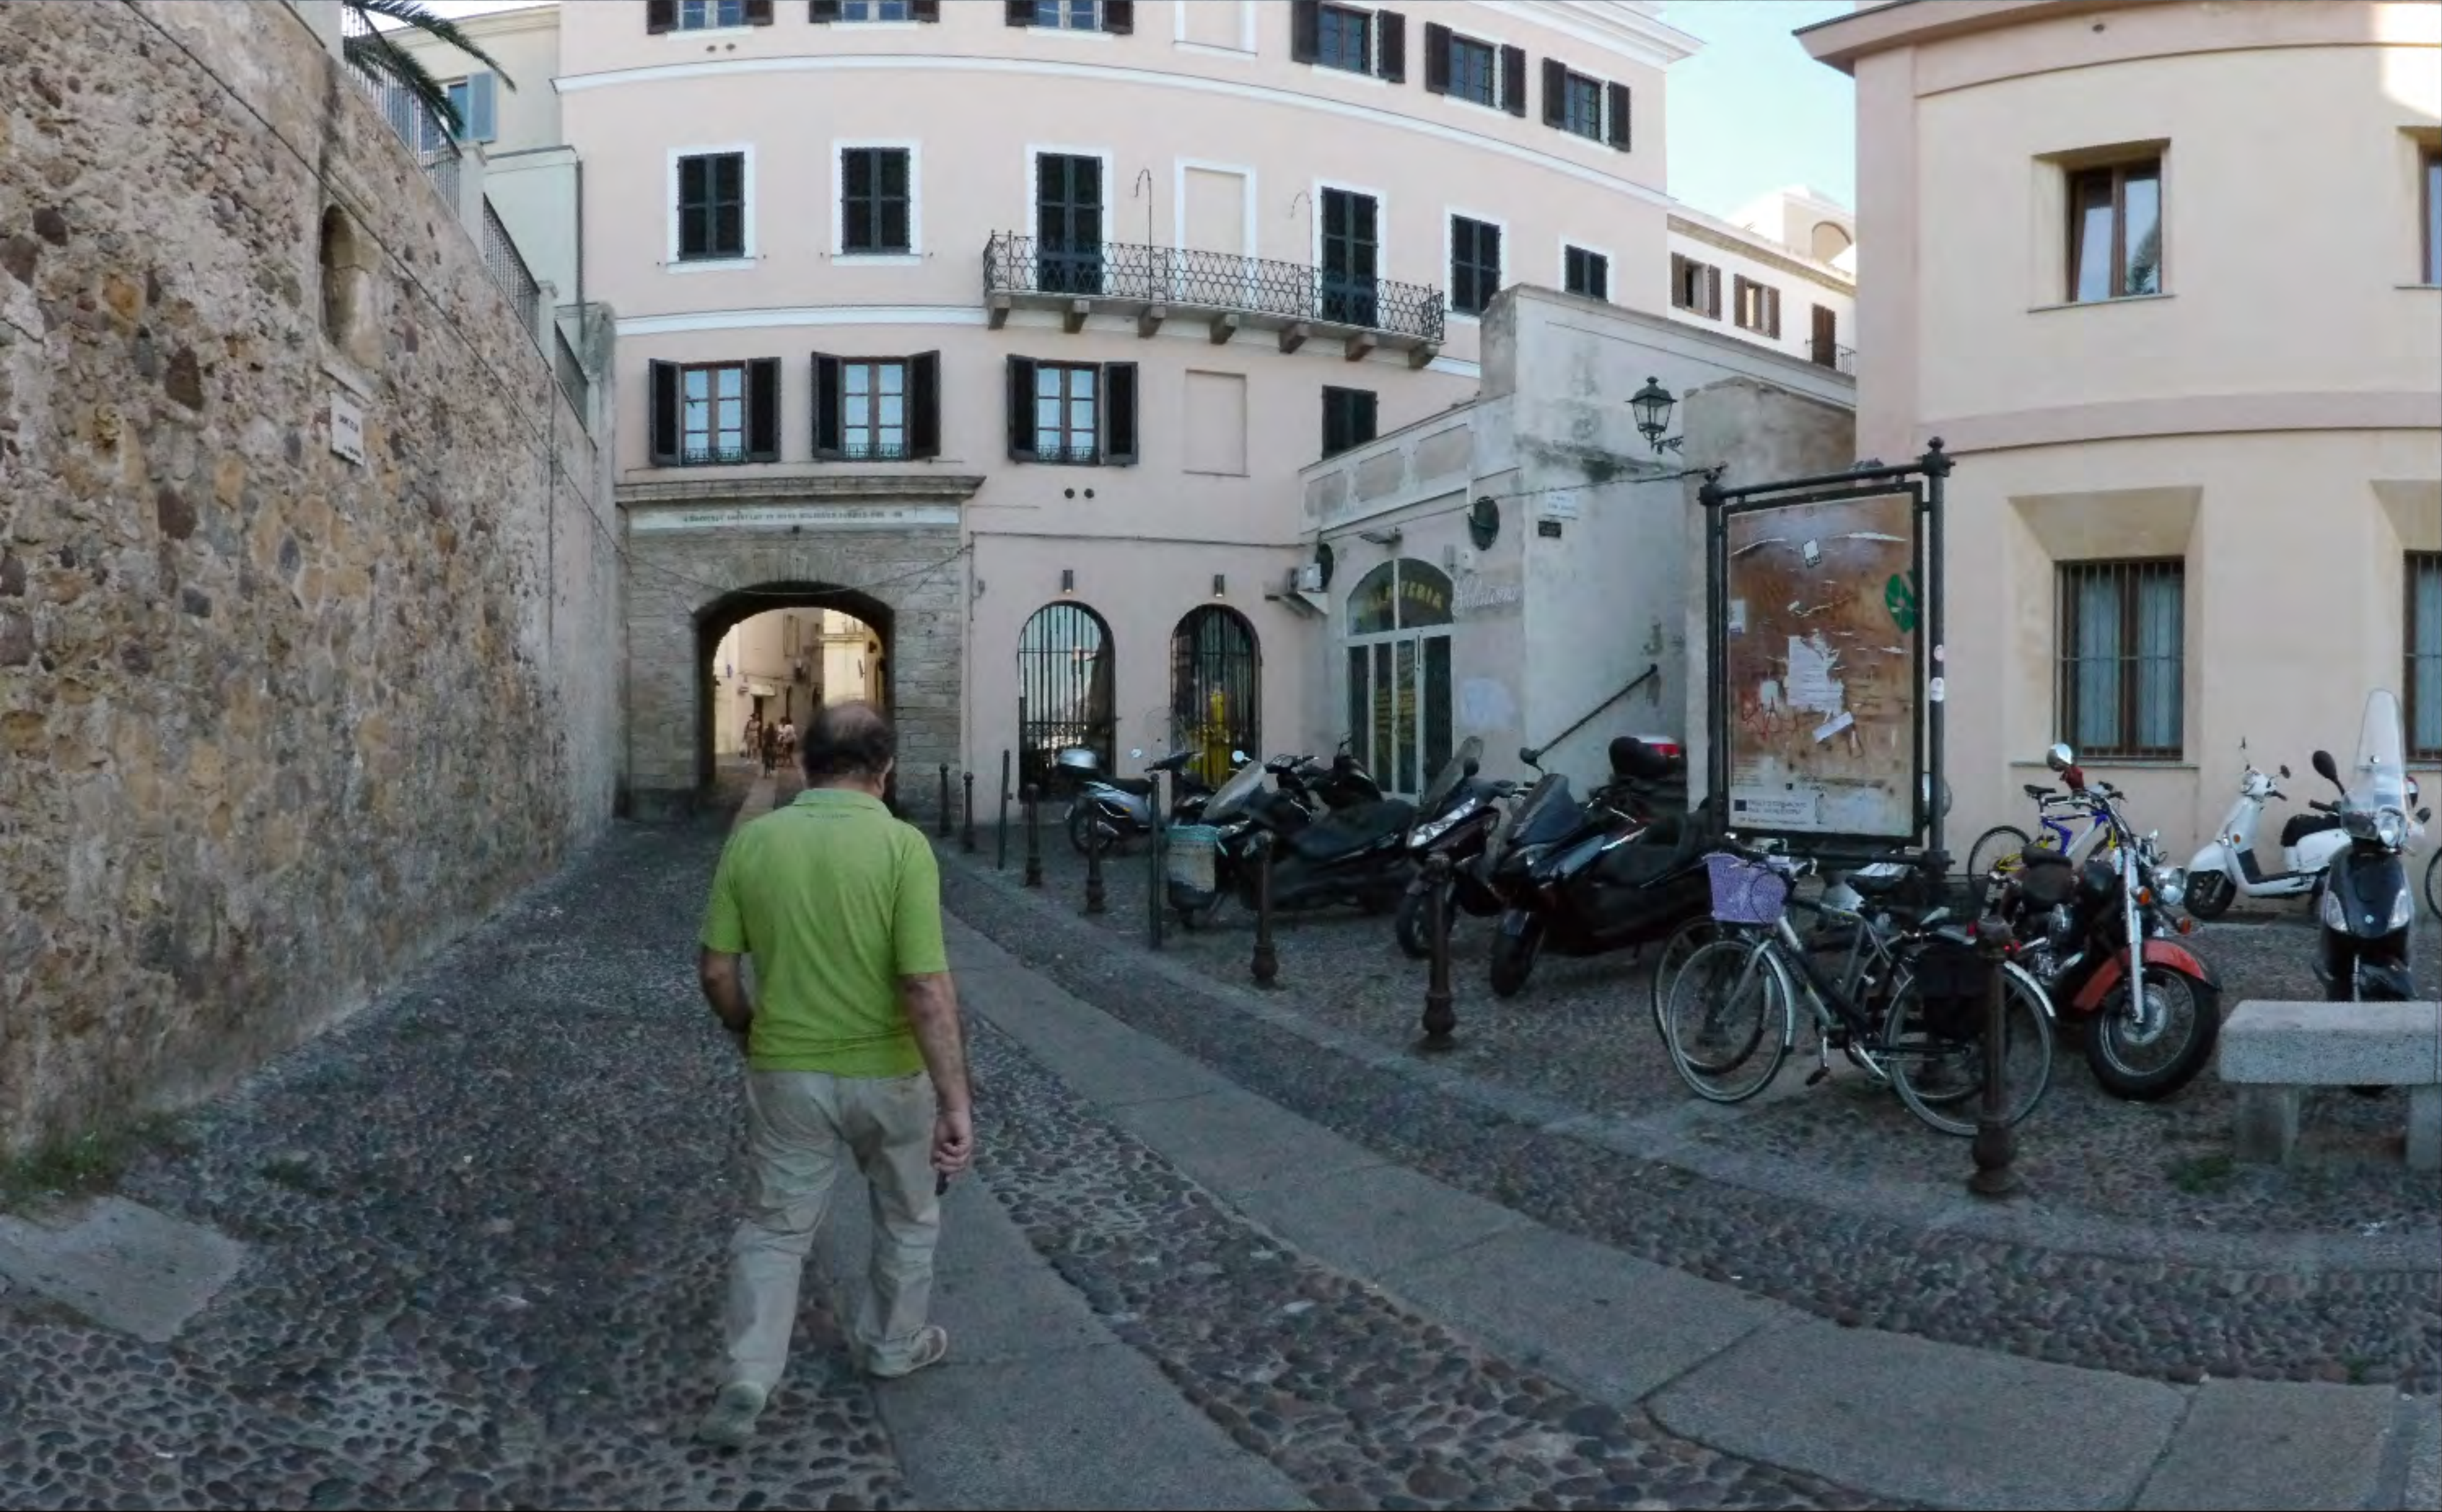

C

A

B

C



A

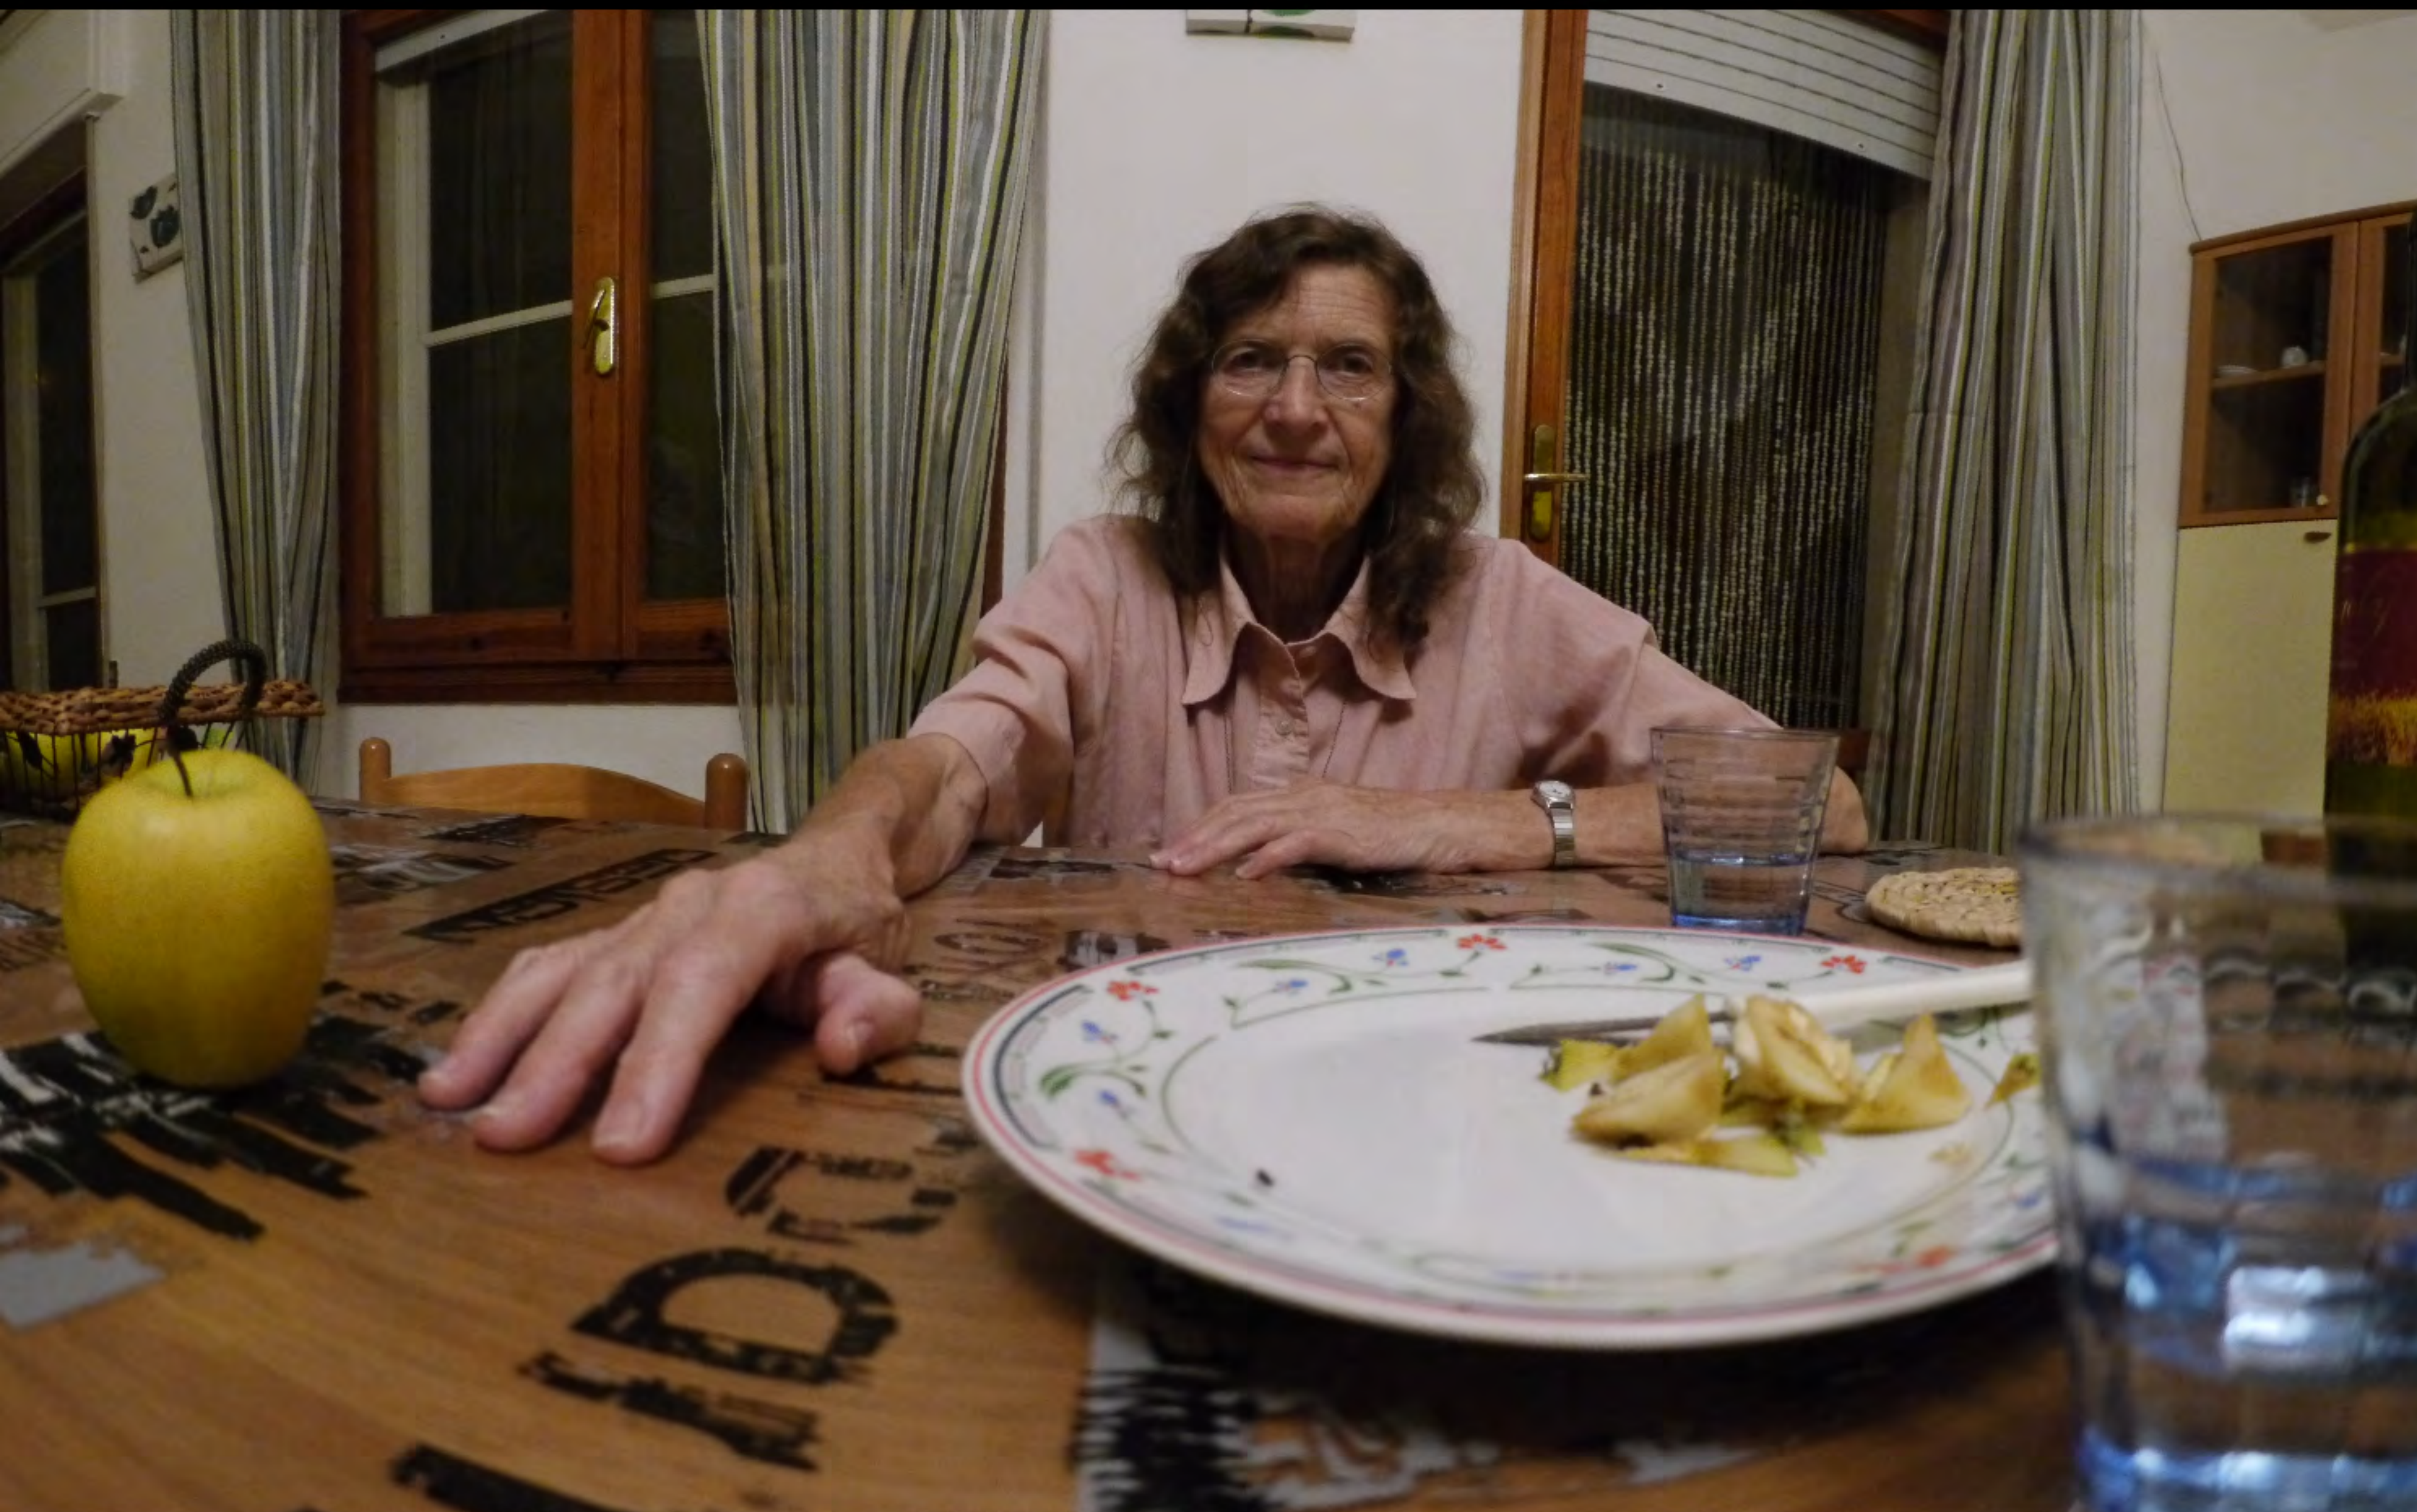

B

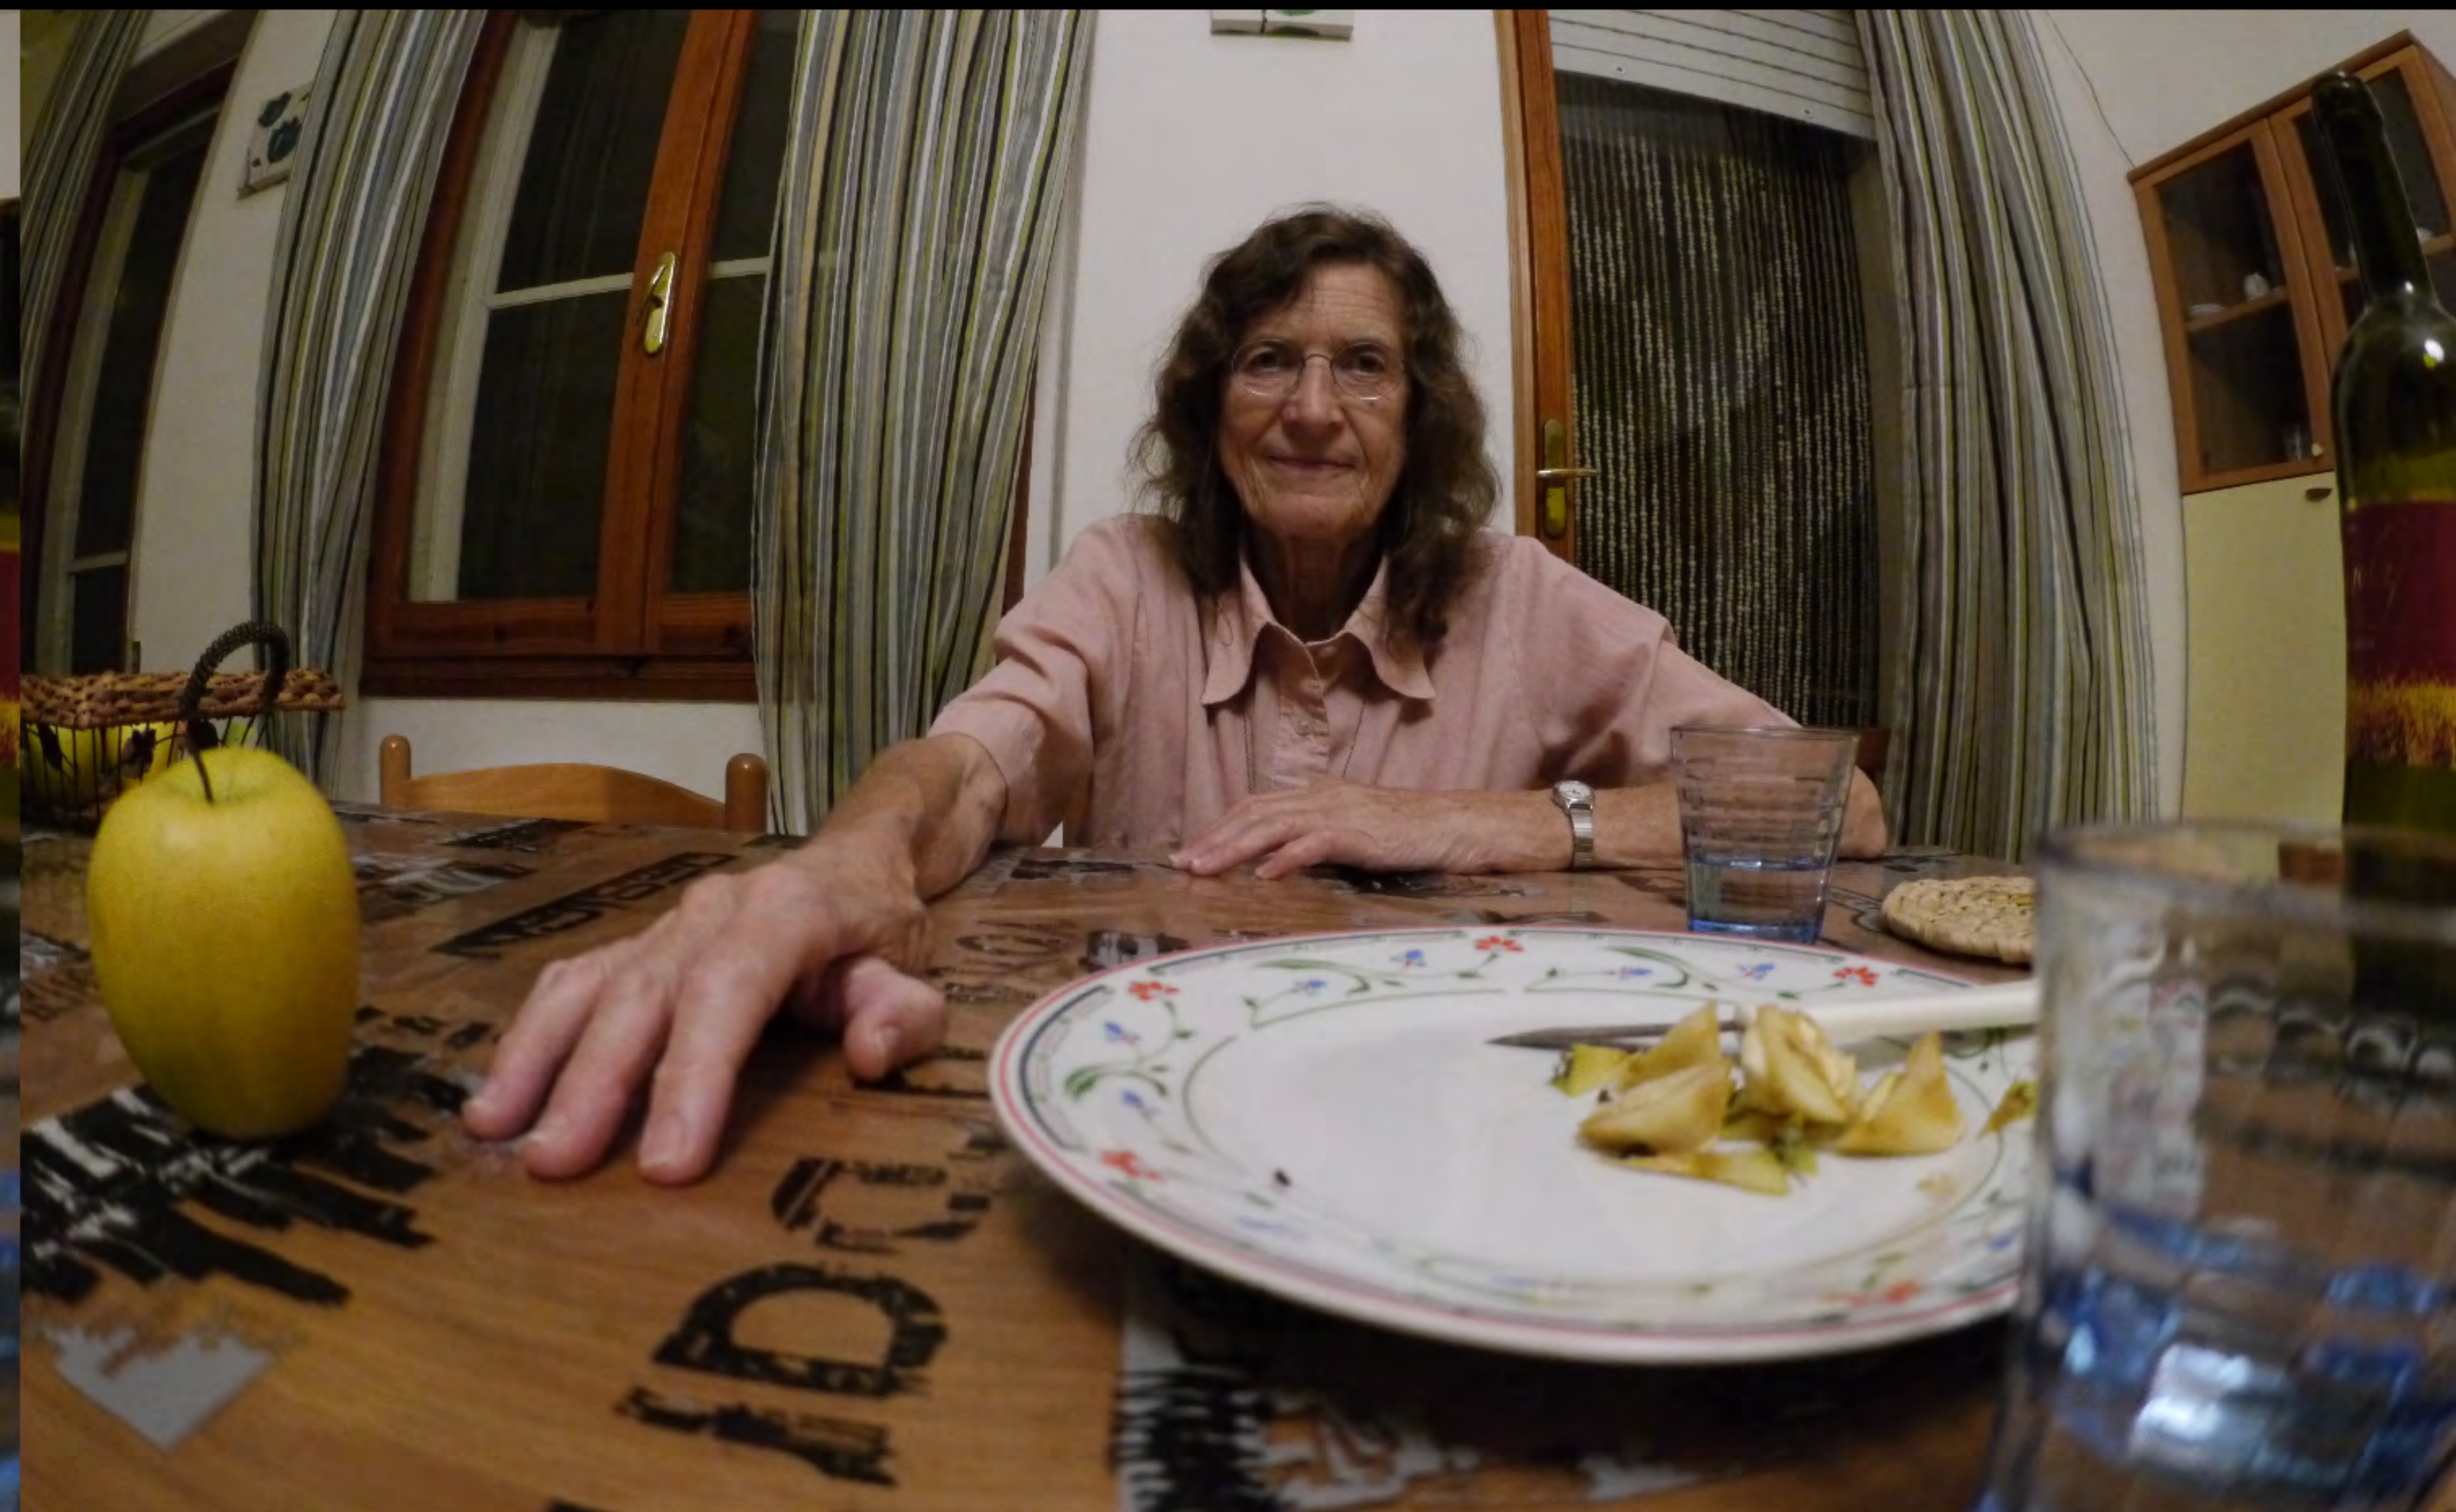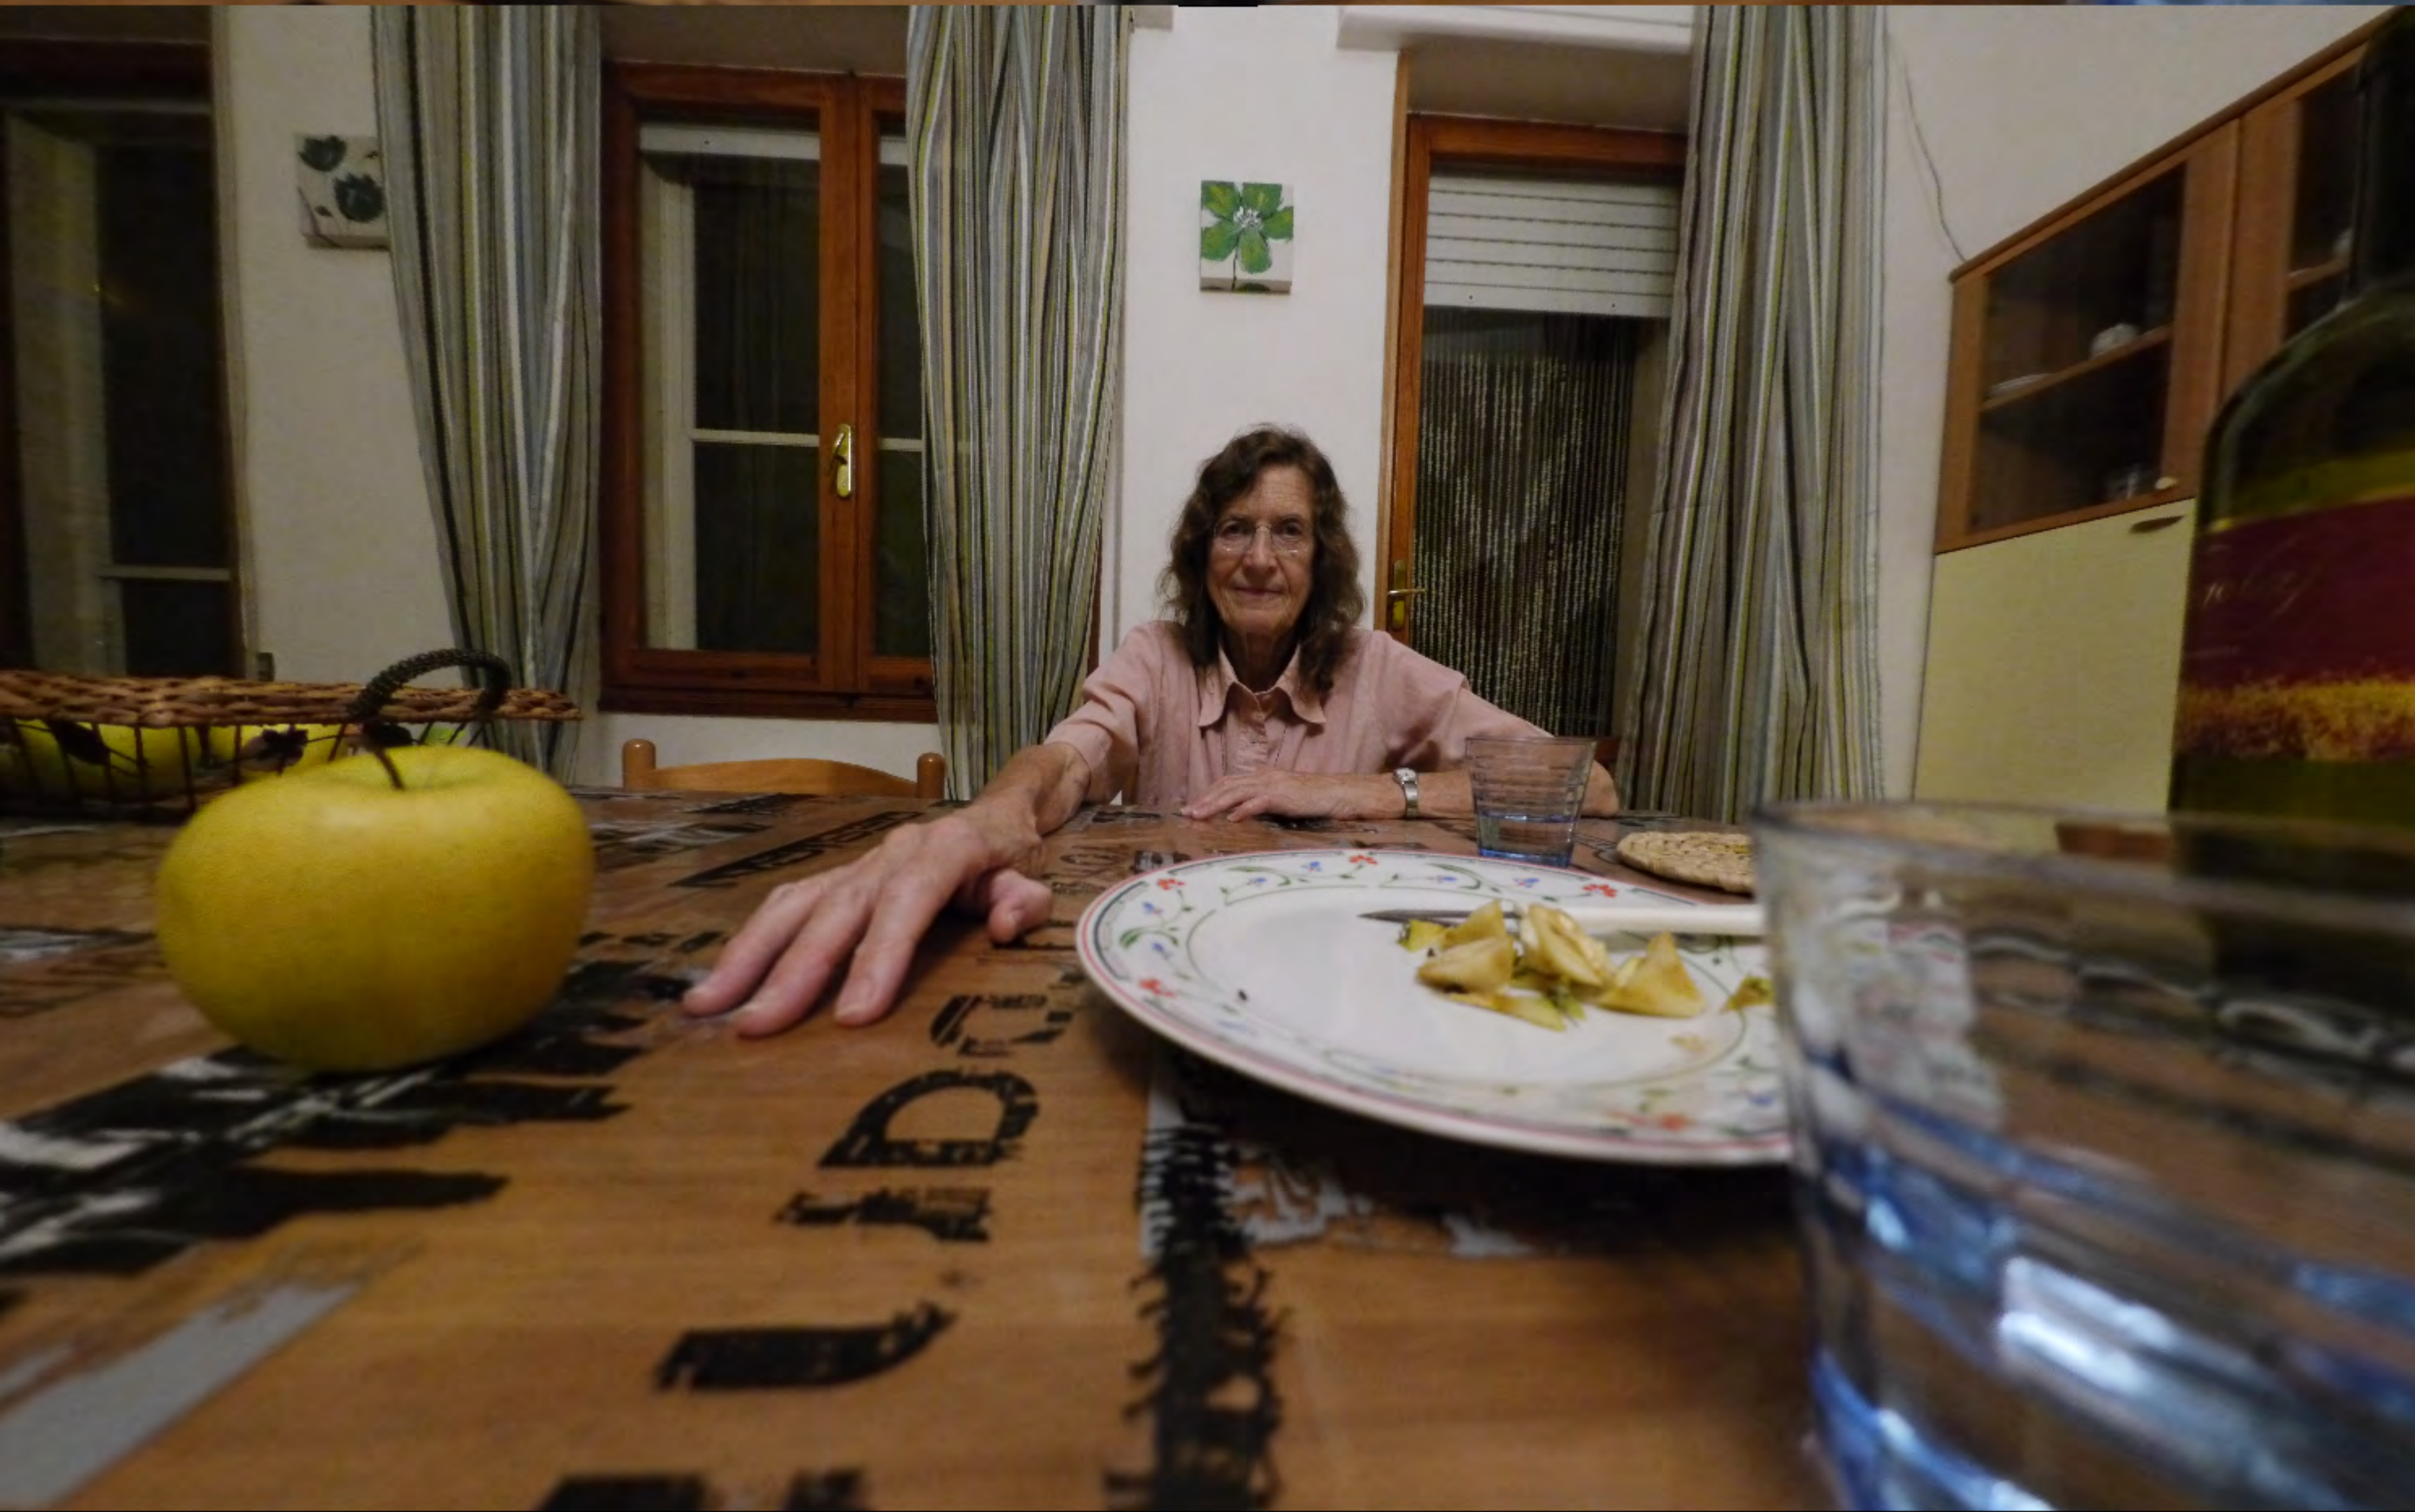

C

|   |   |
|---|---|
| A | B |
| C |   |



A

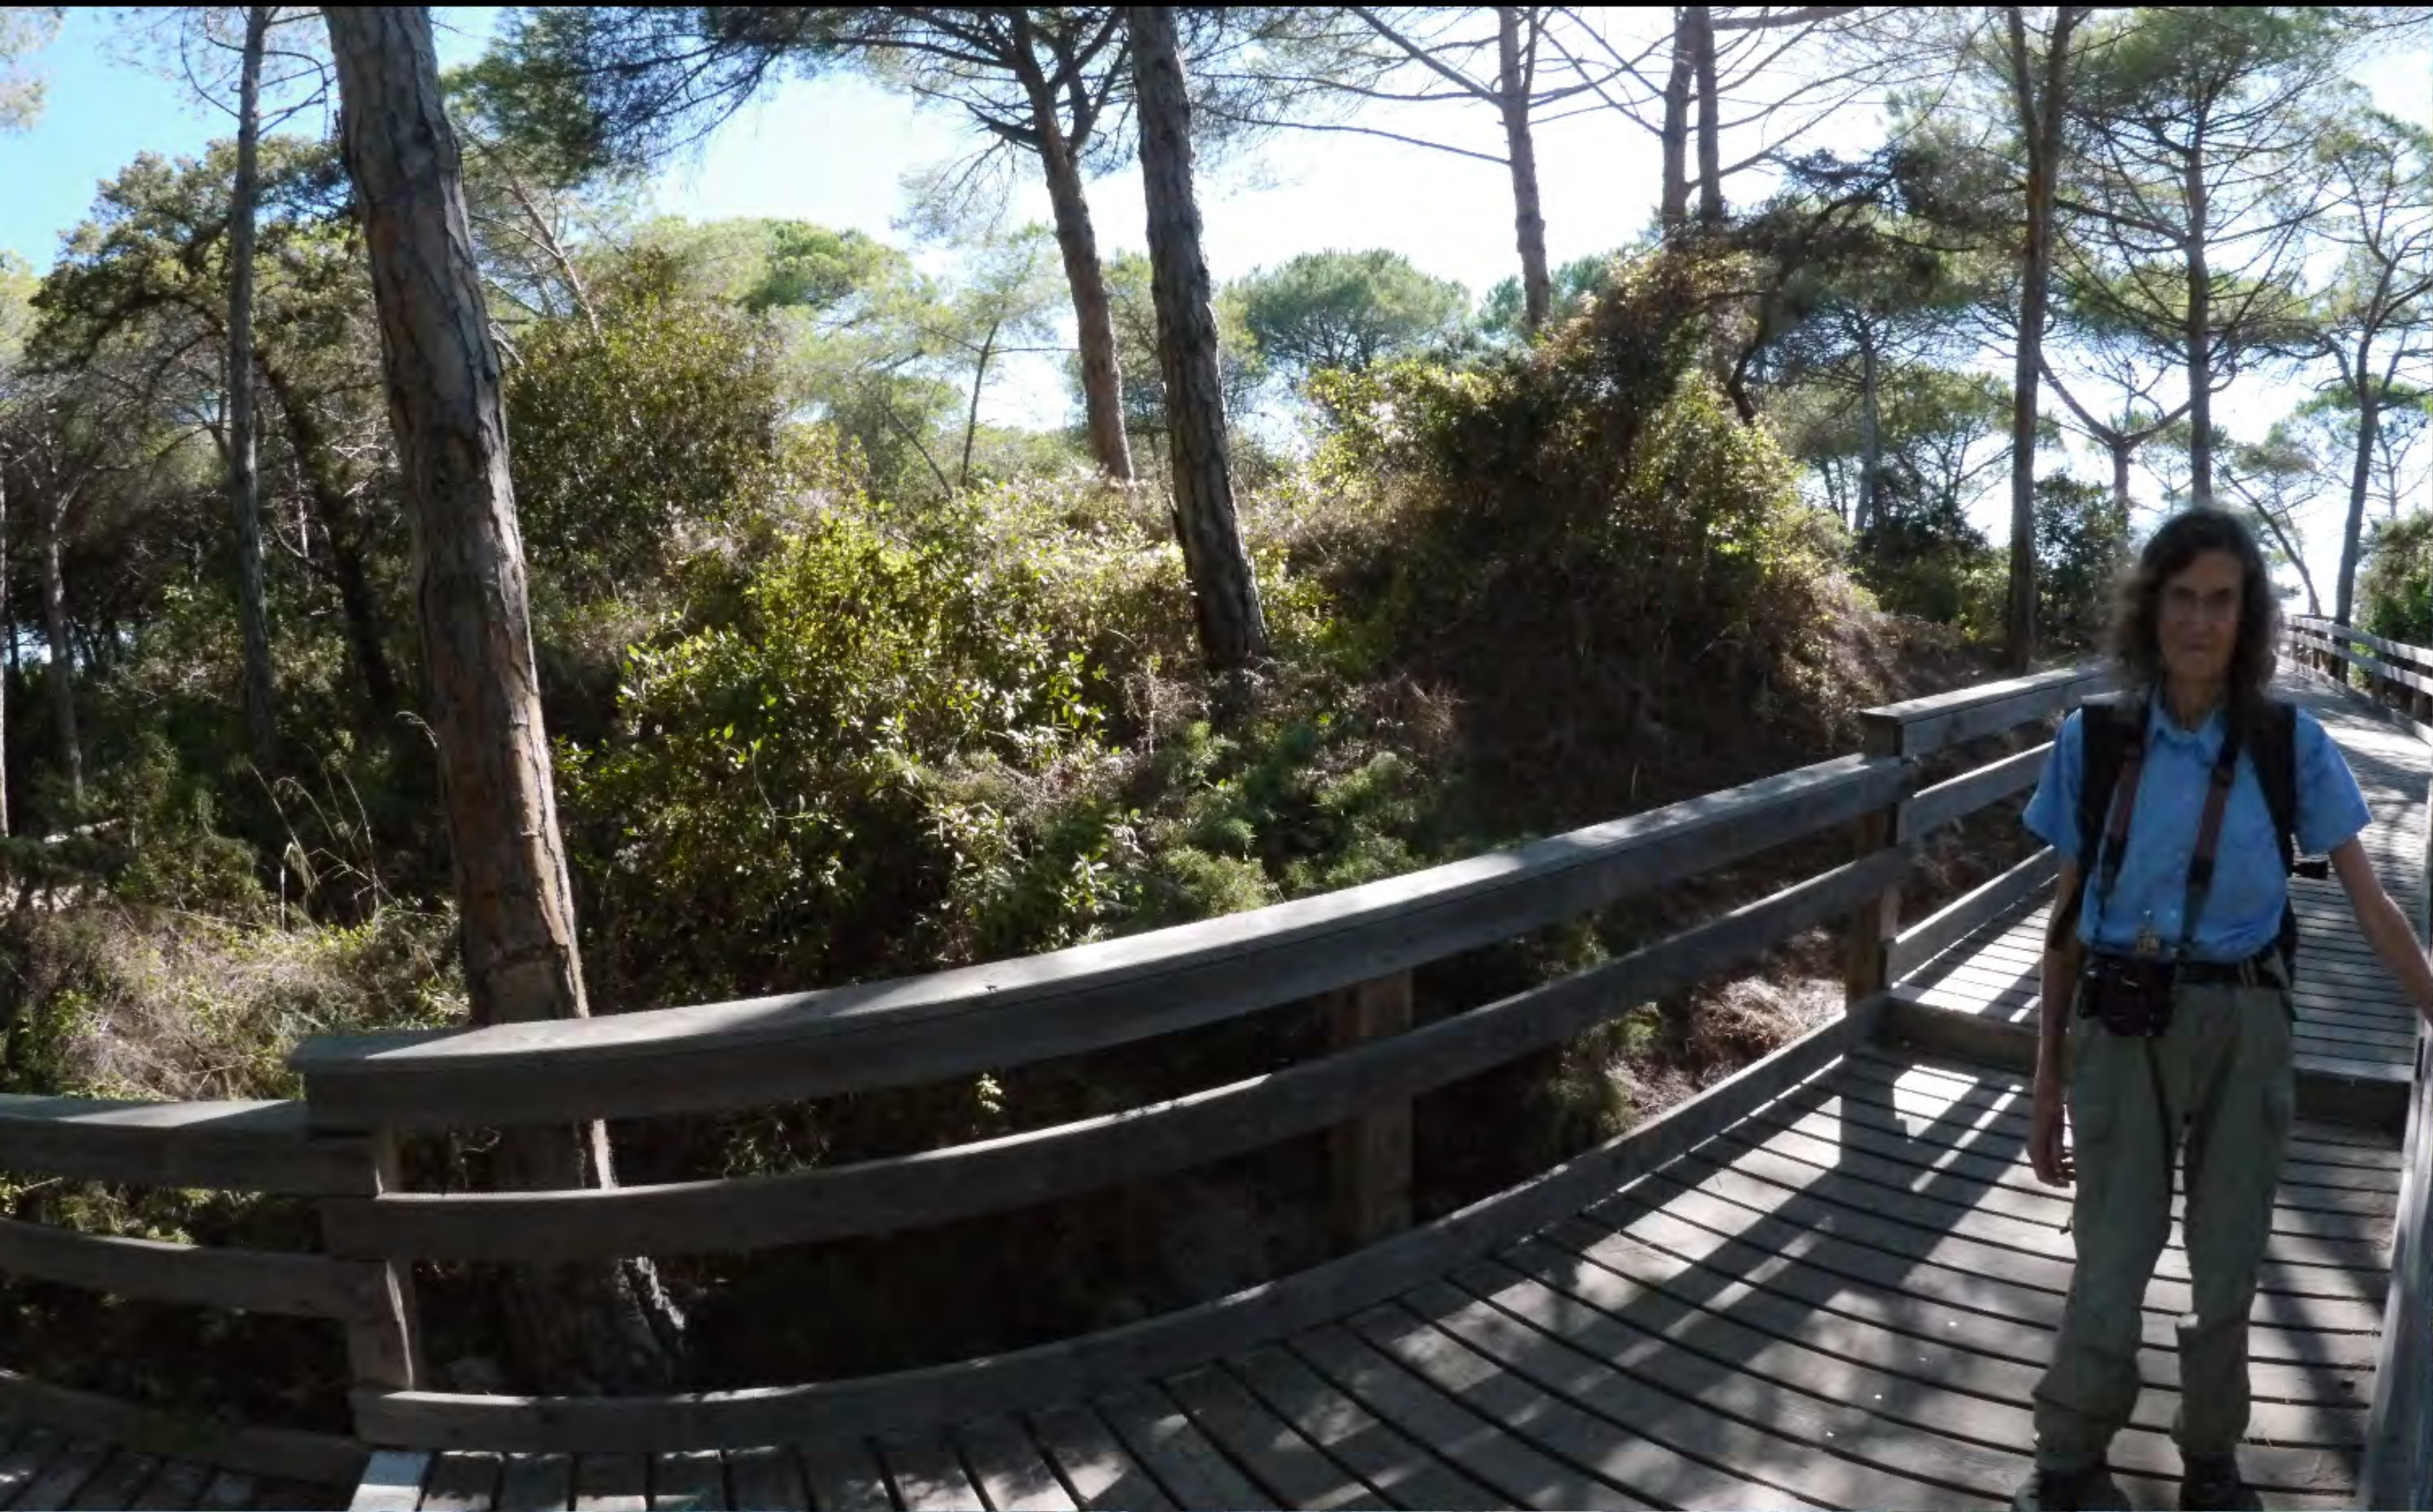

B

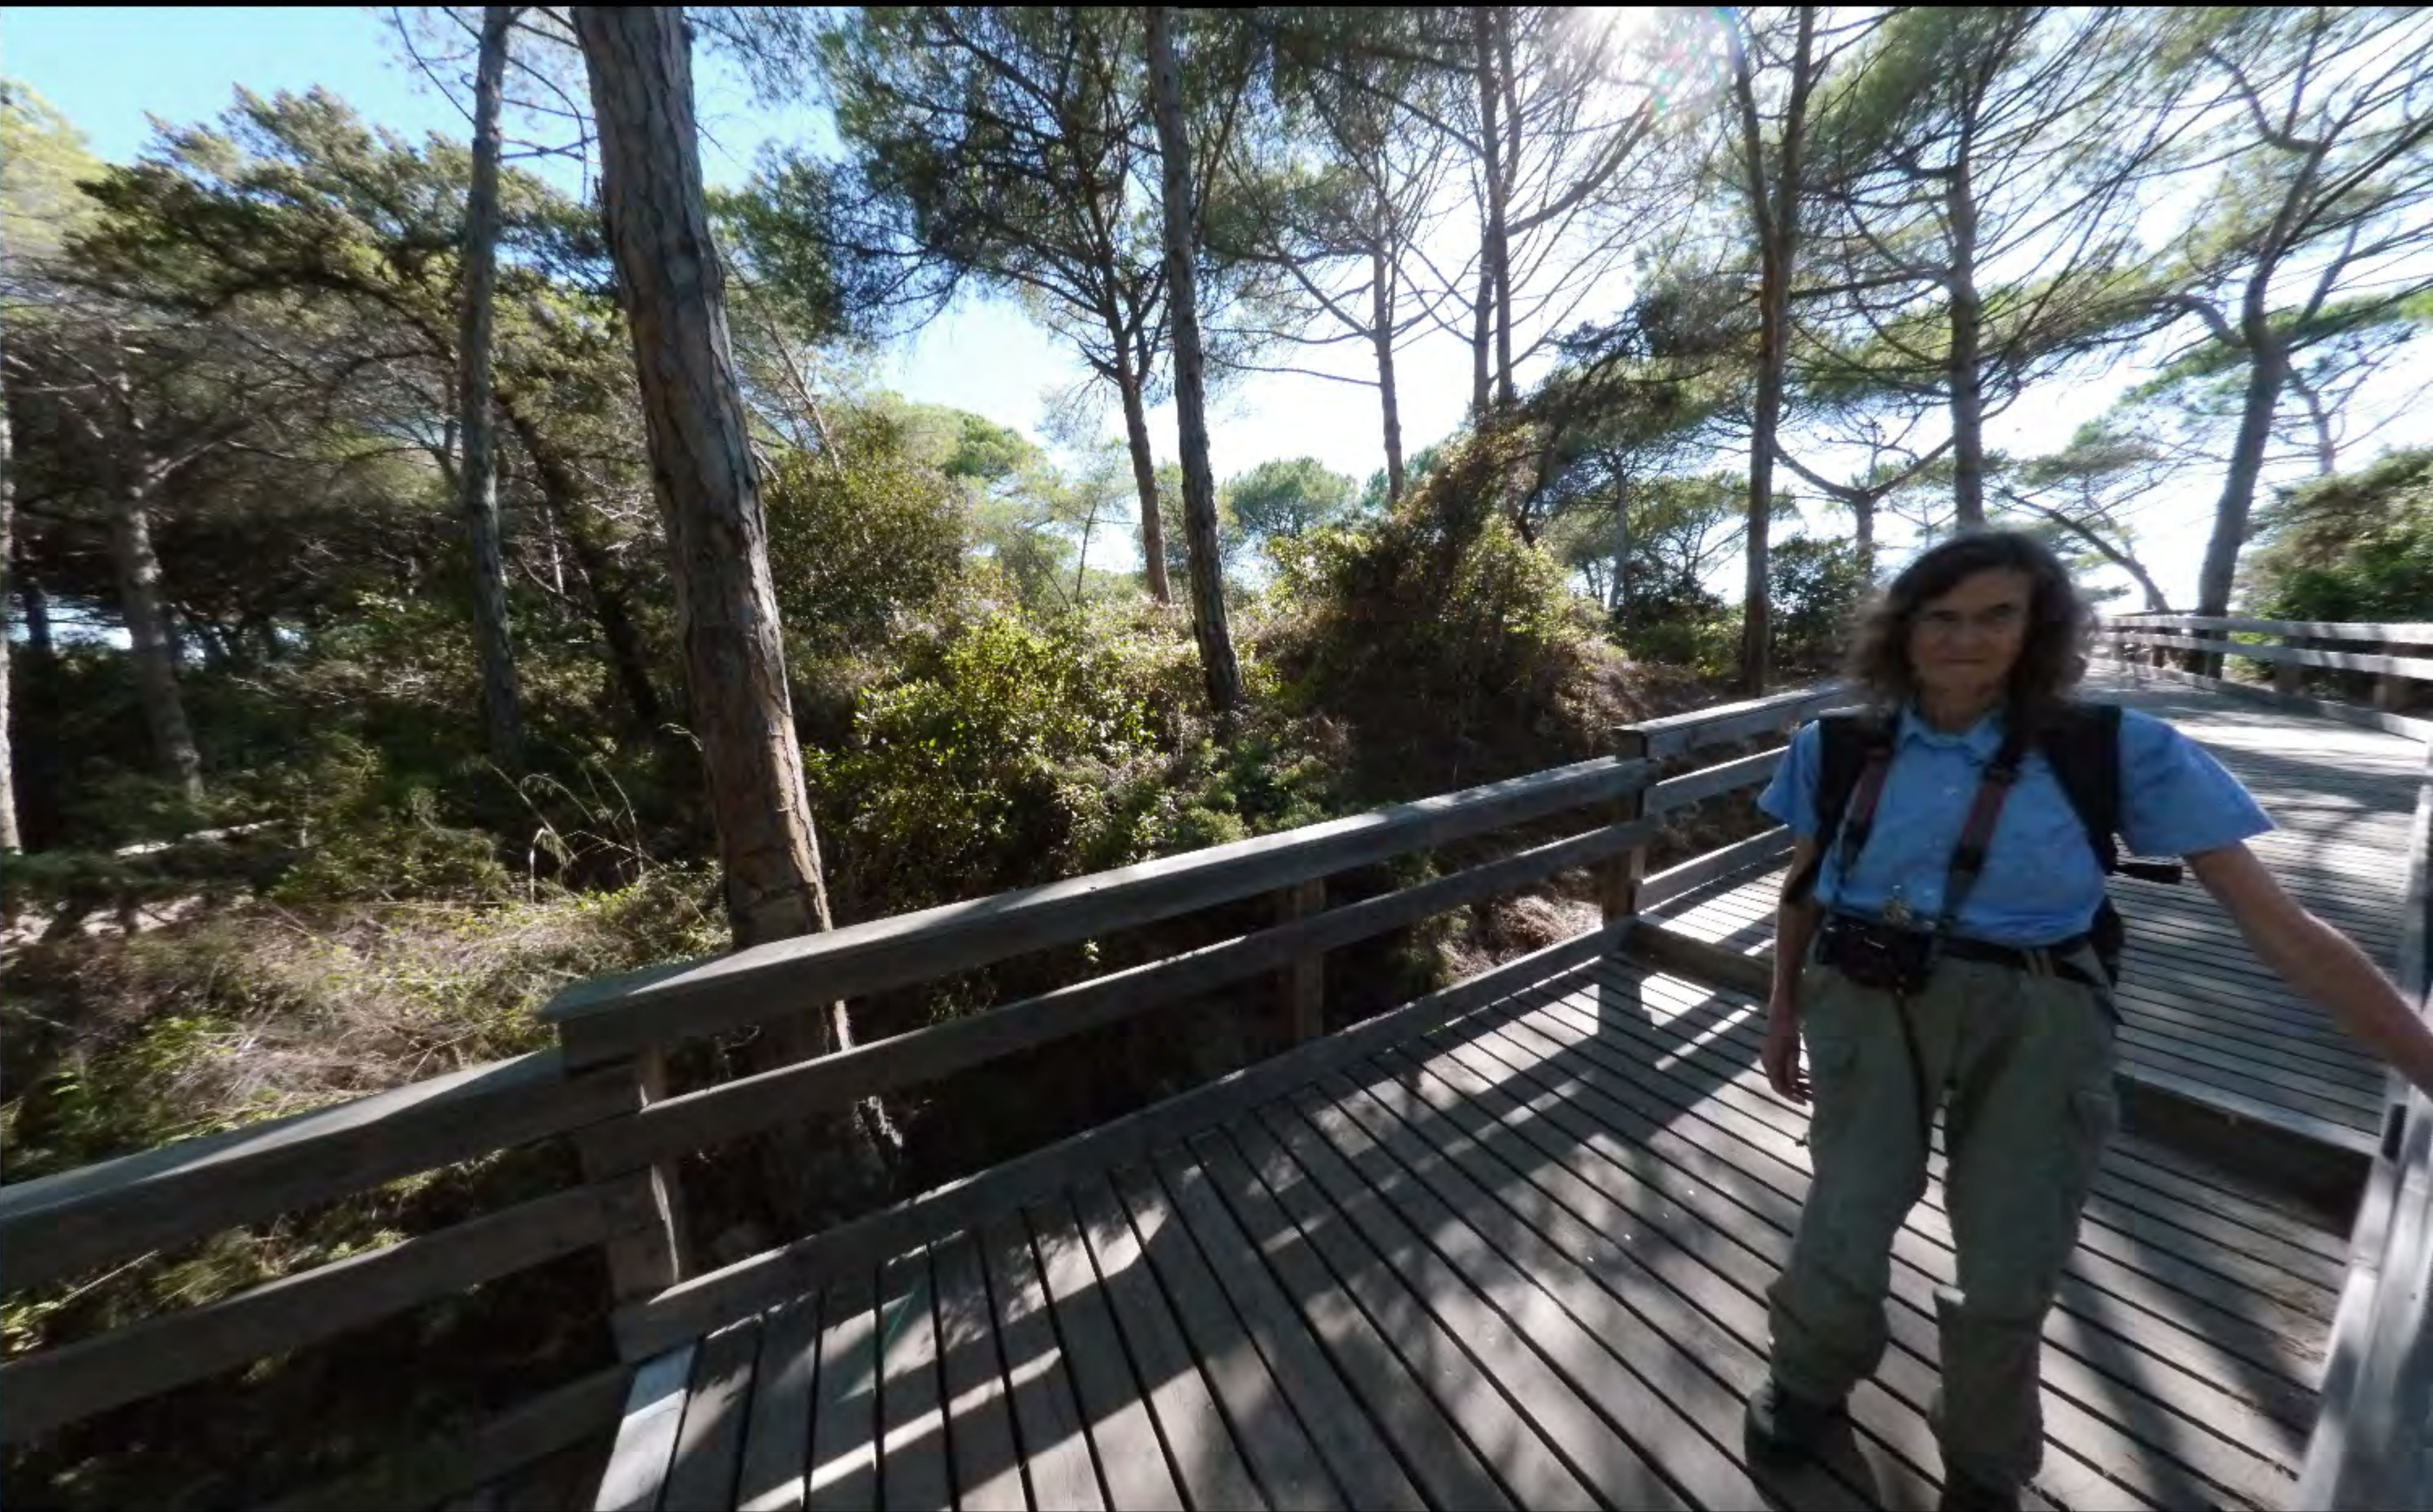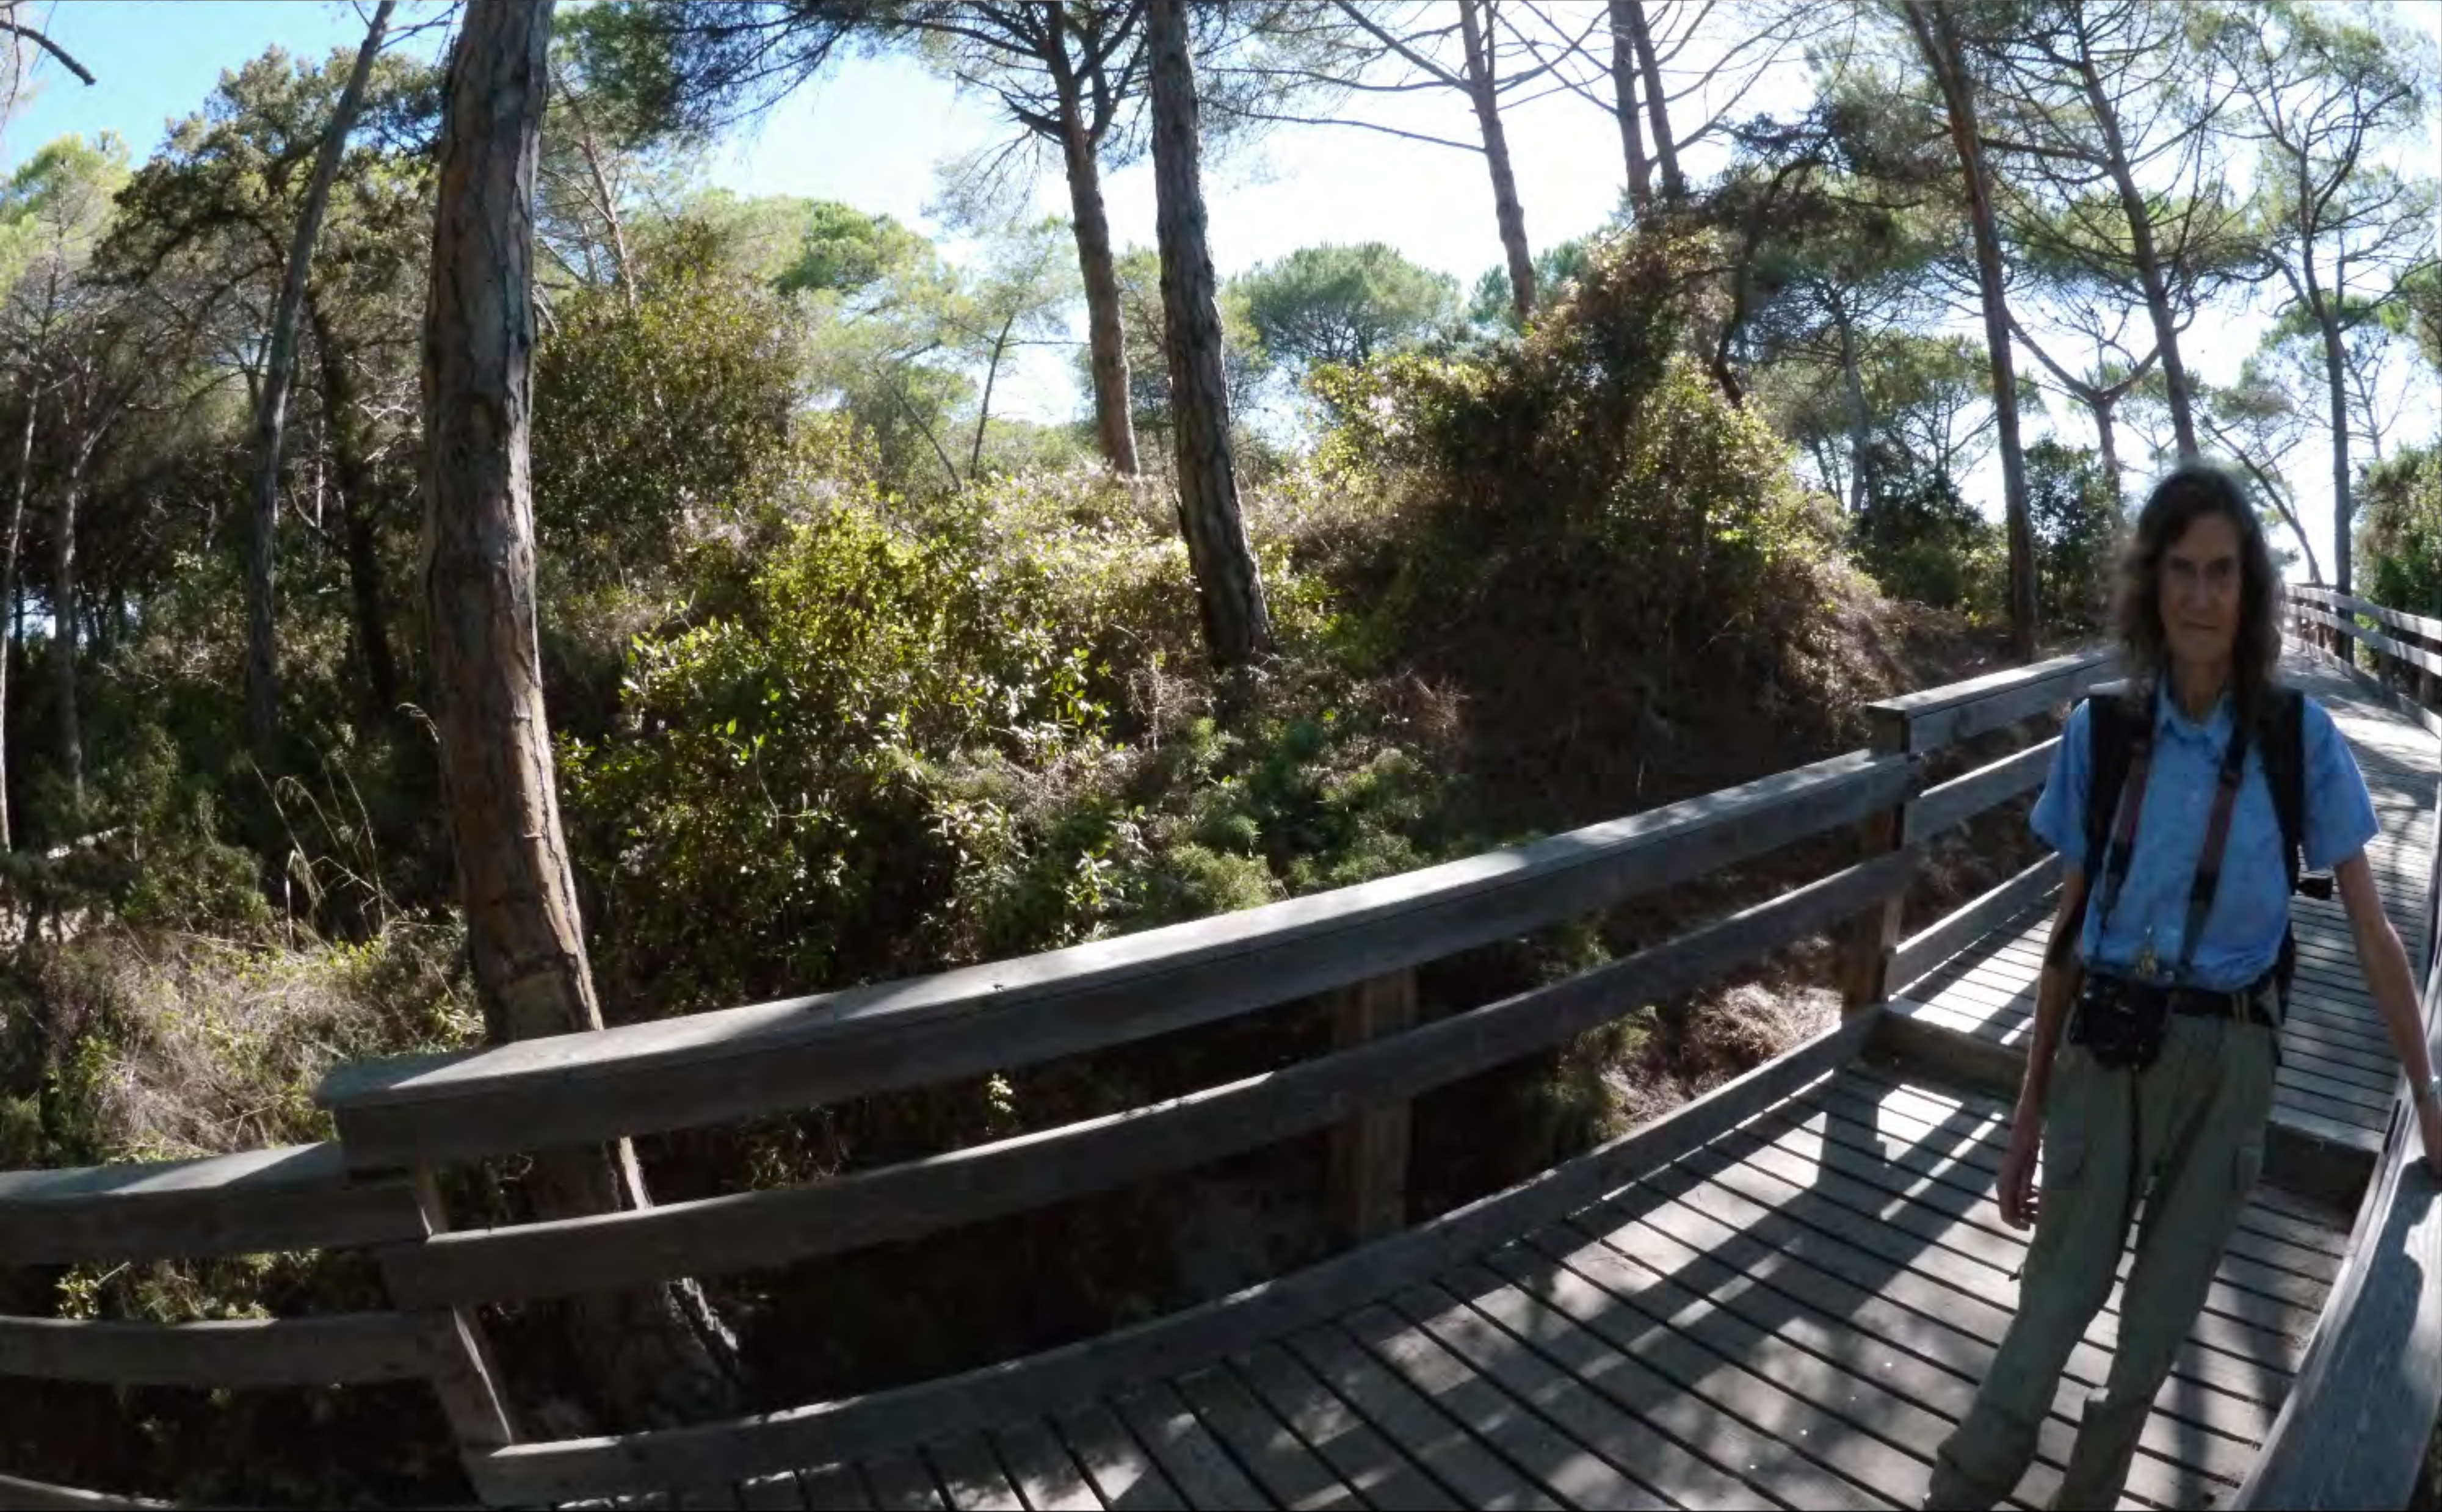

C

|   |   |
|---|---|
| A | B |
| C |   |



A

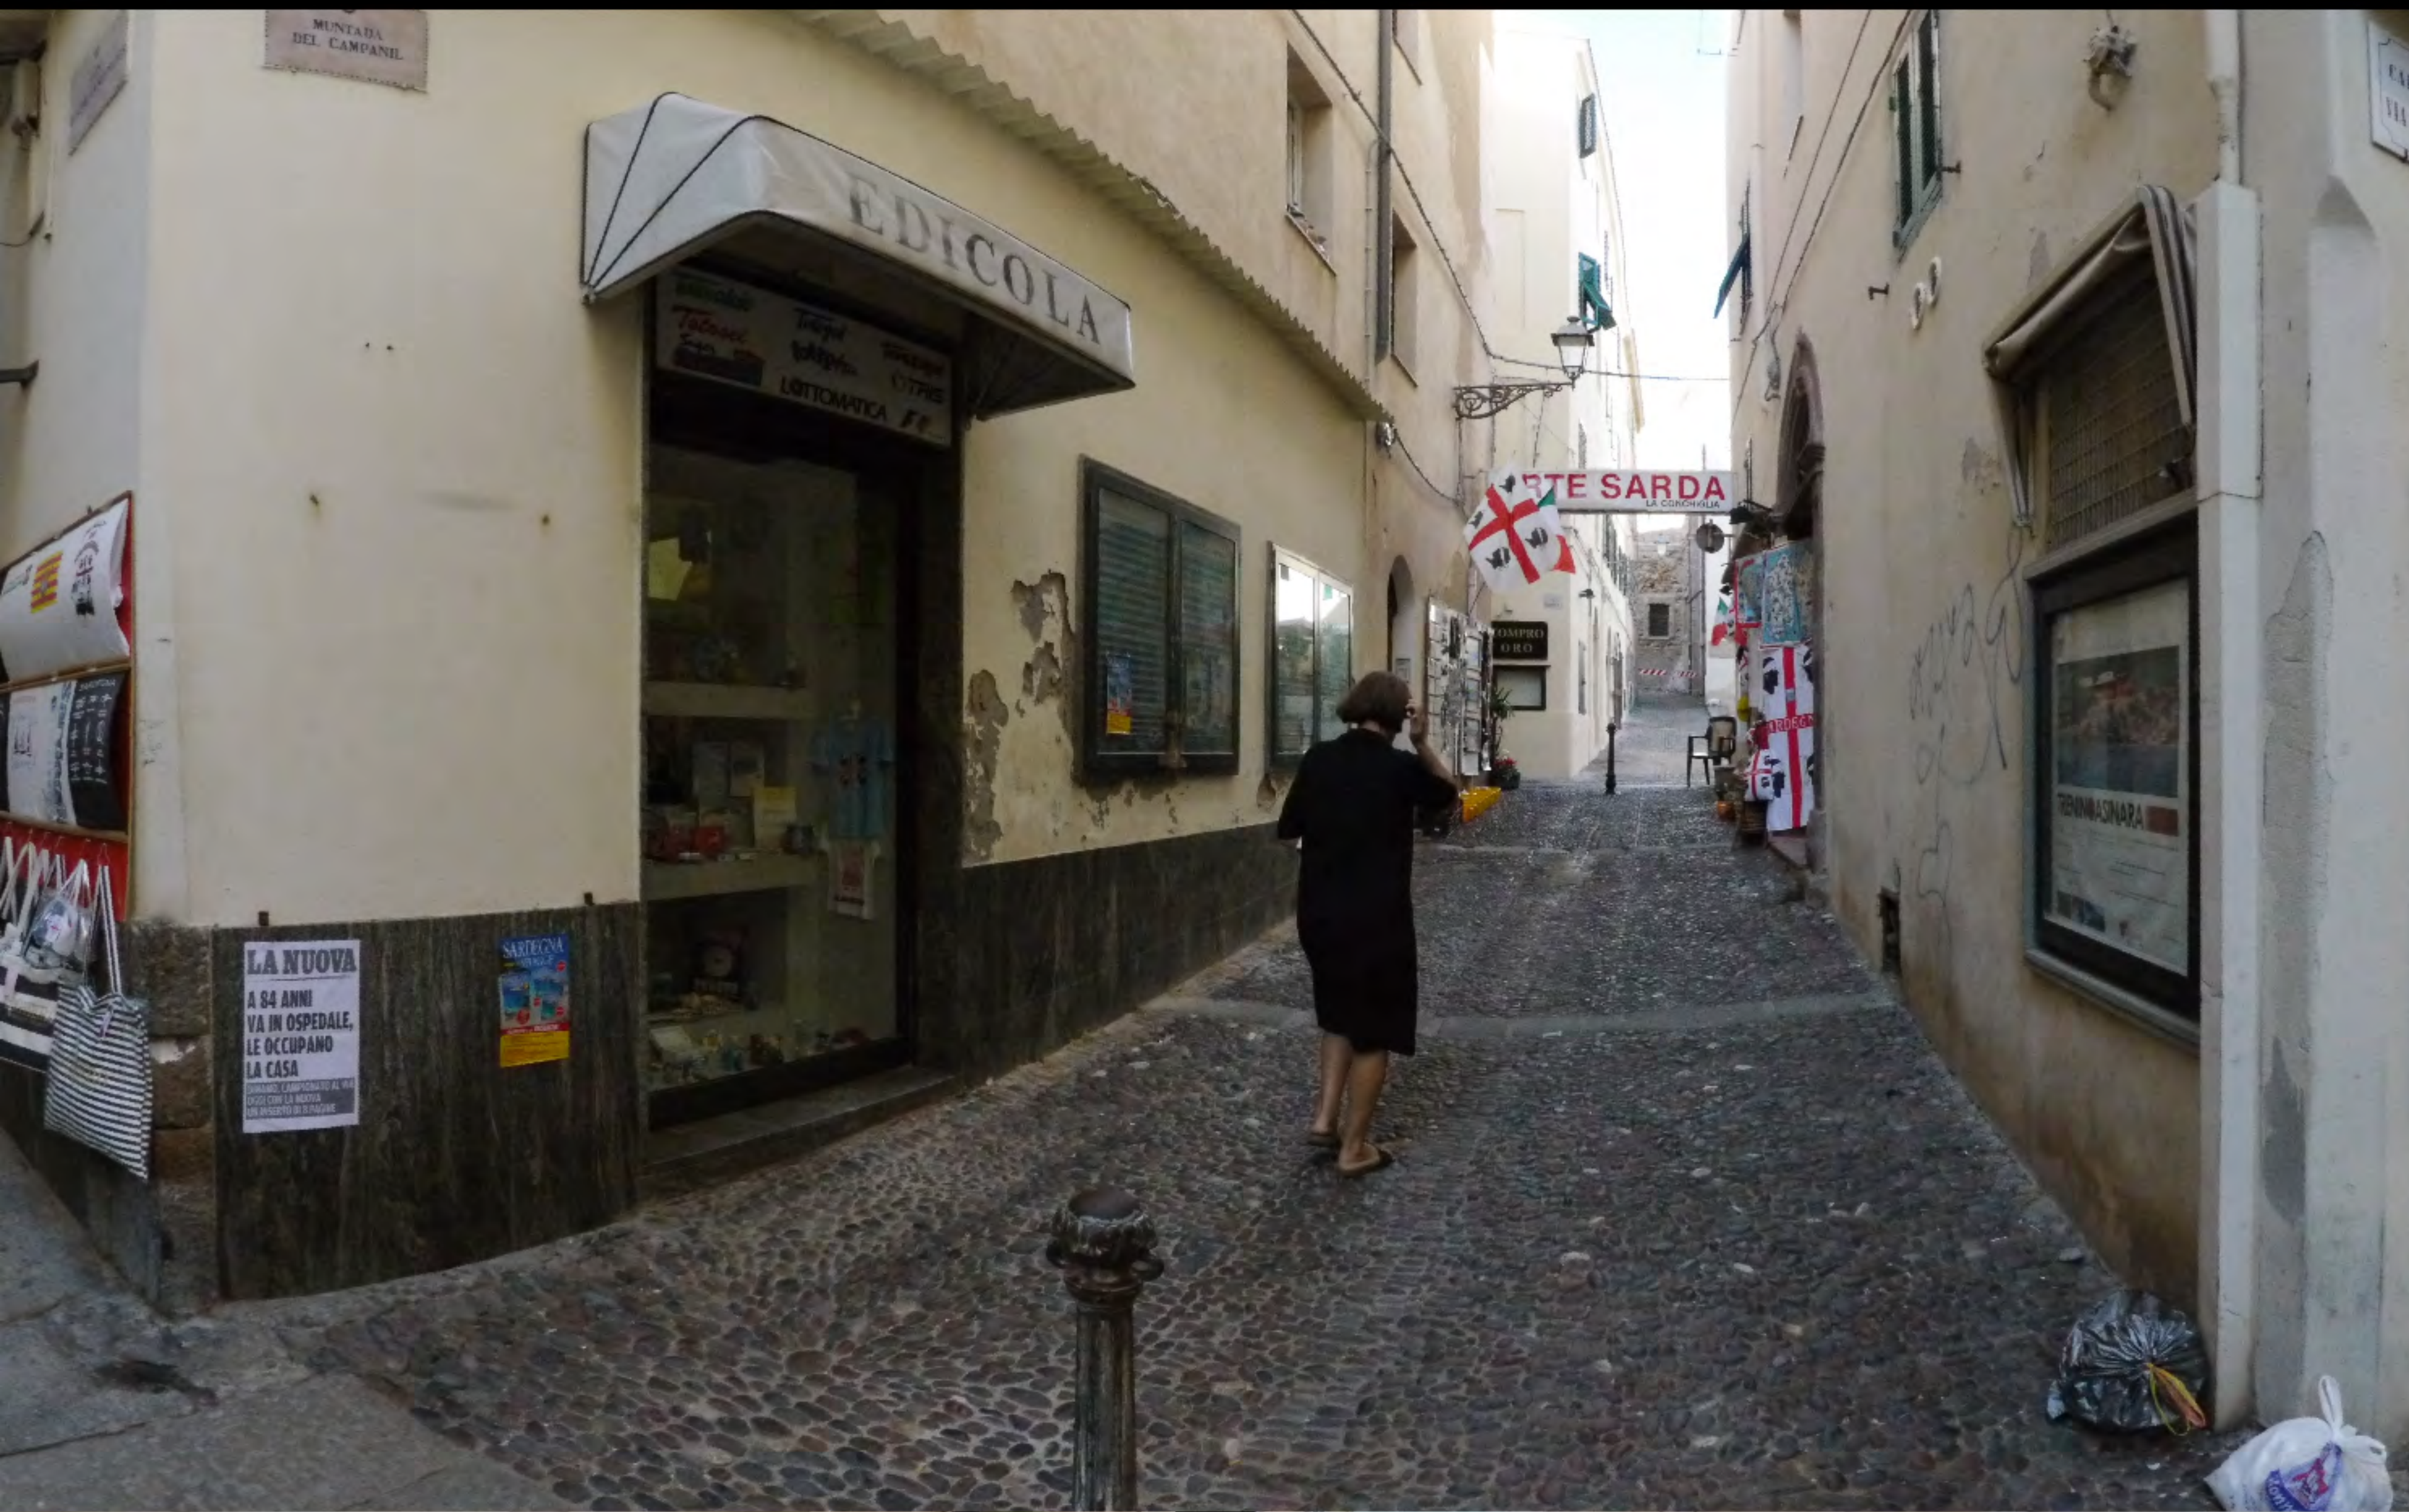

B

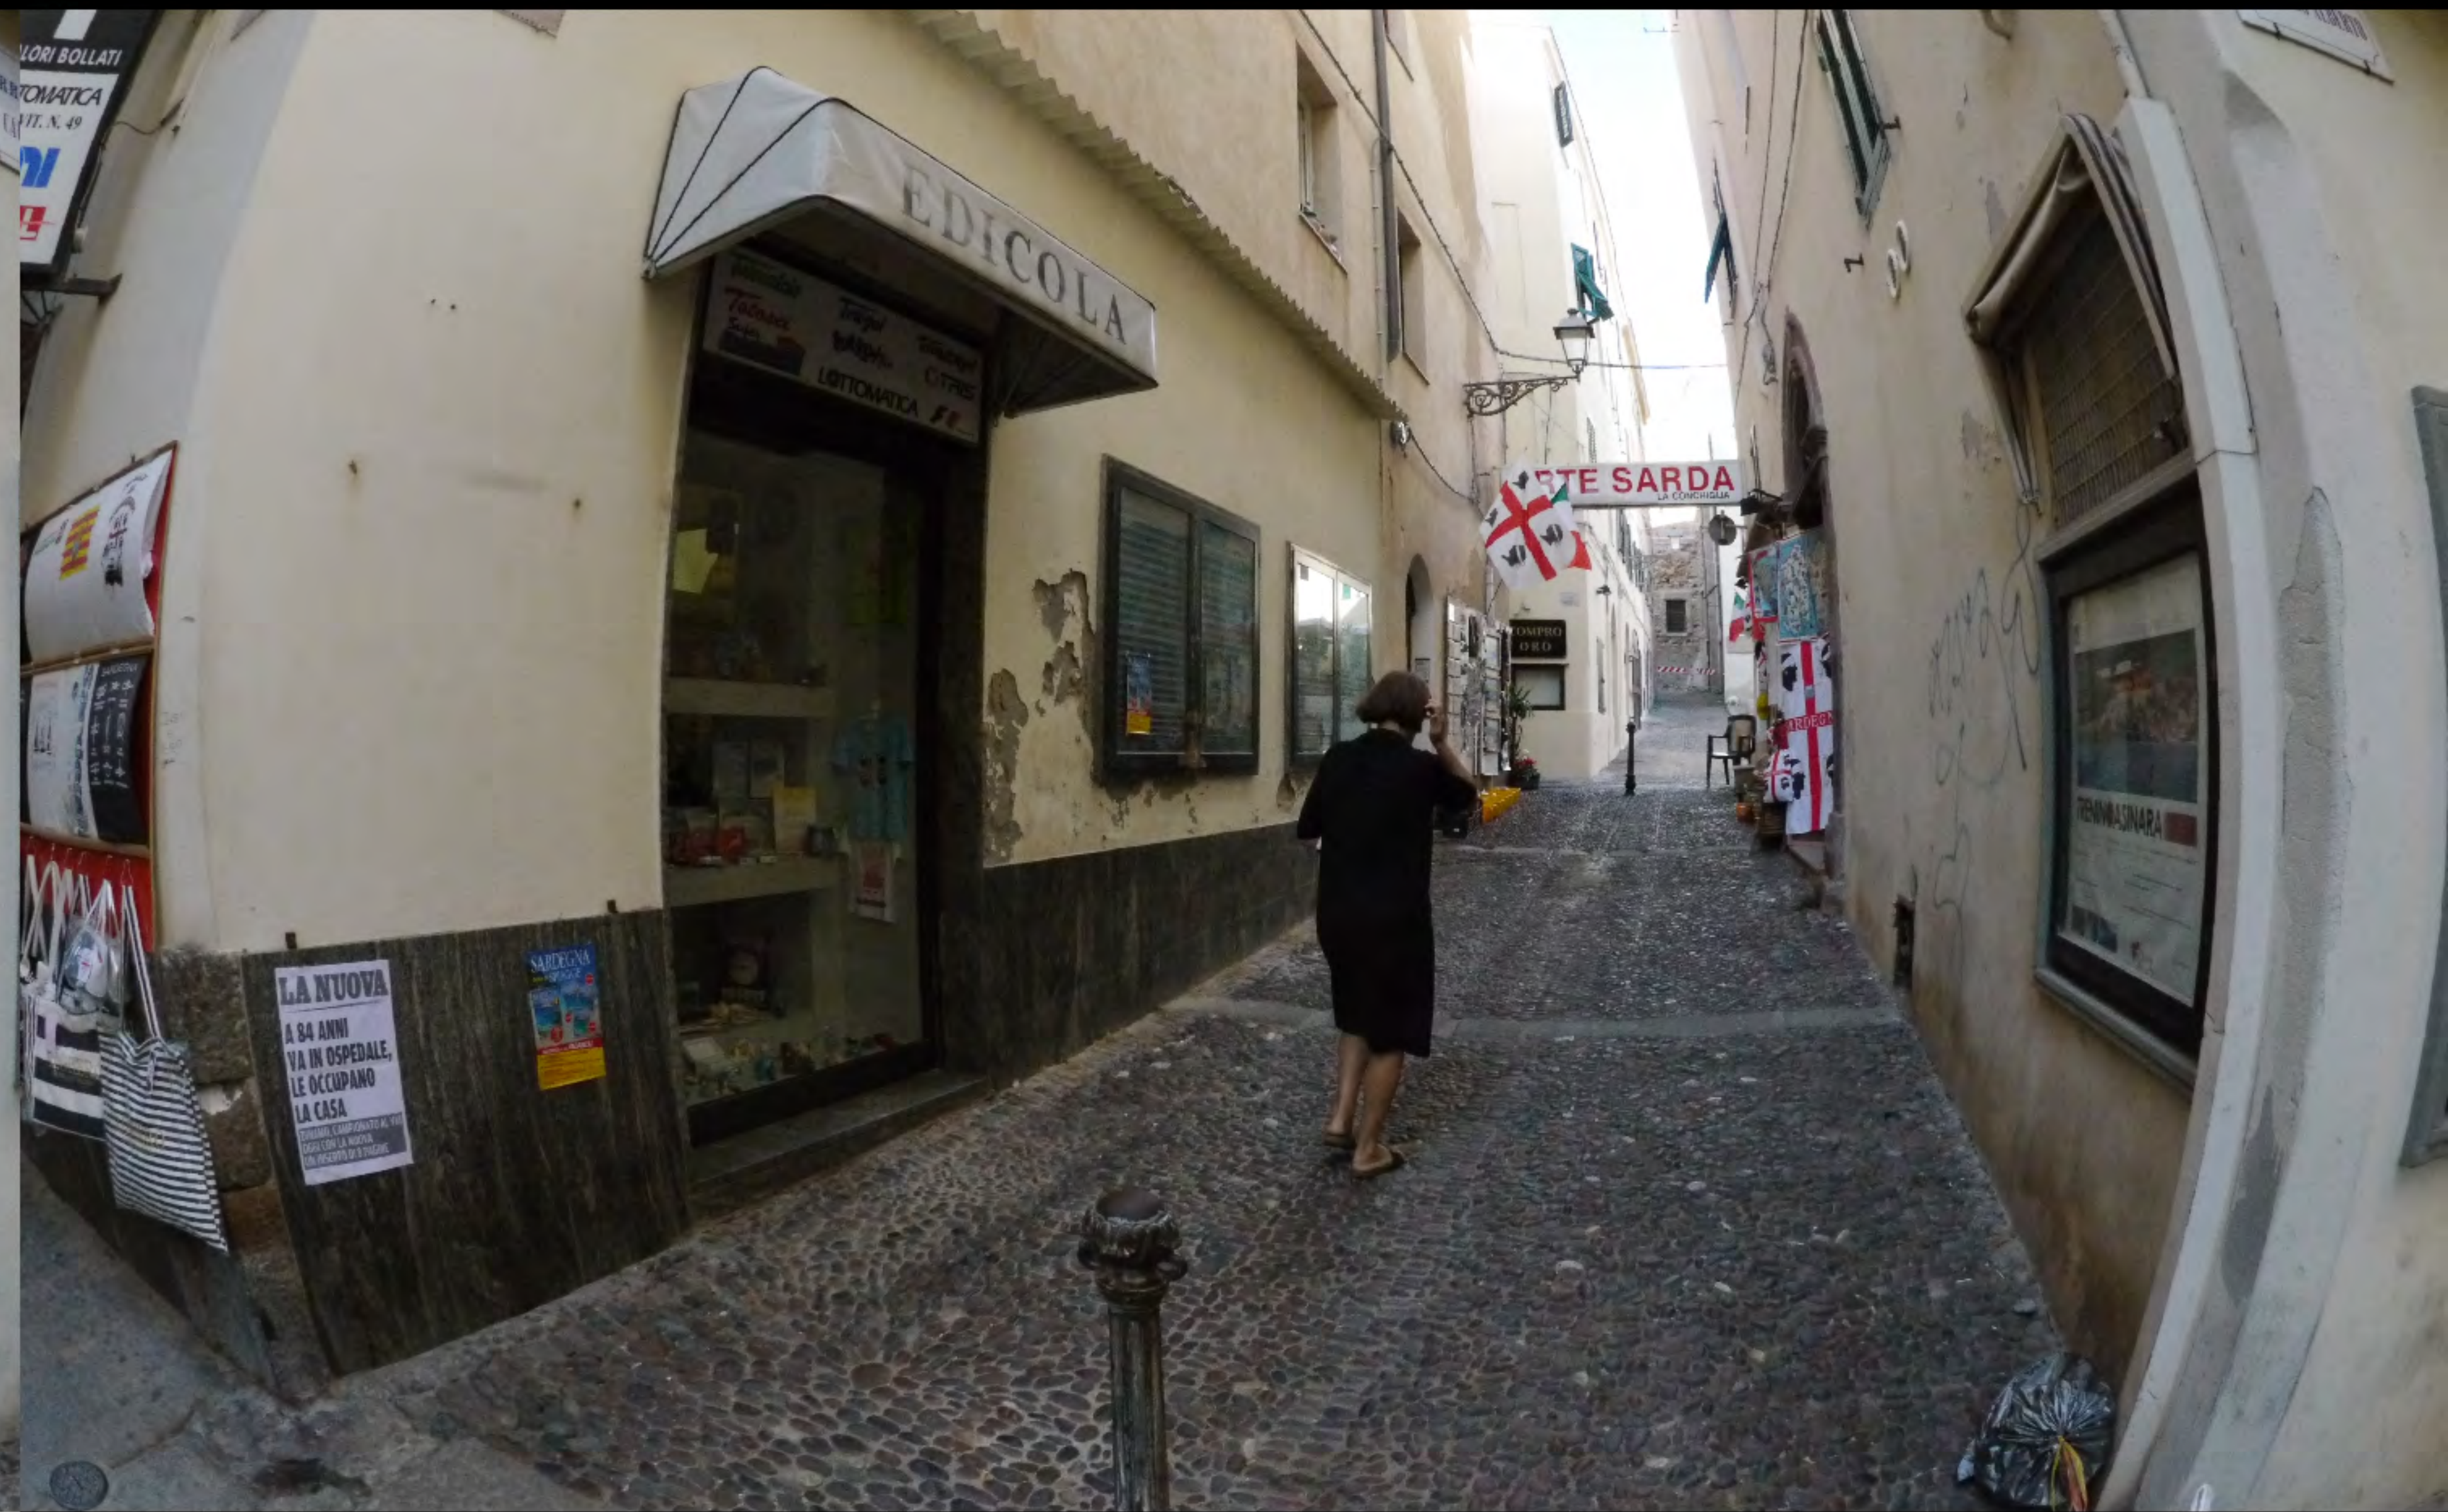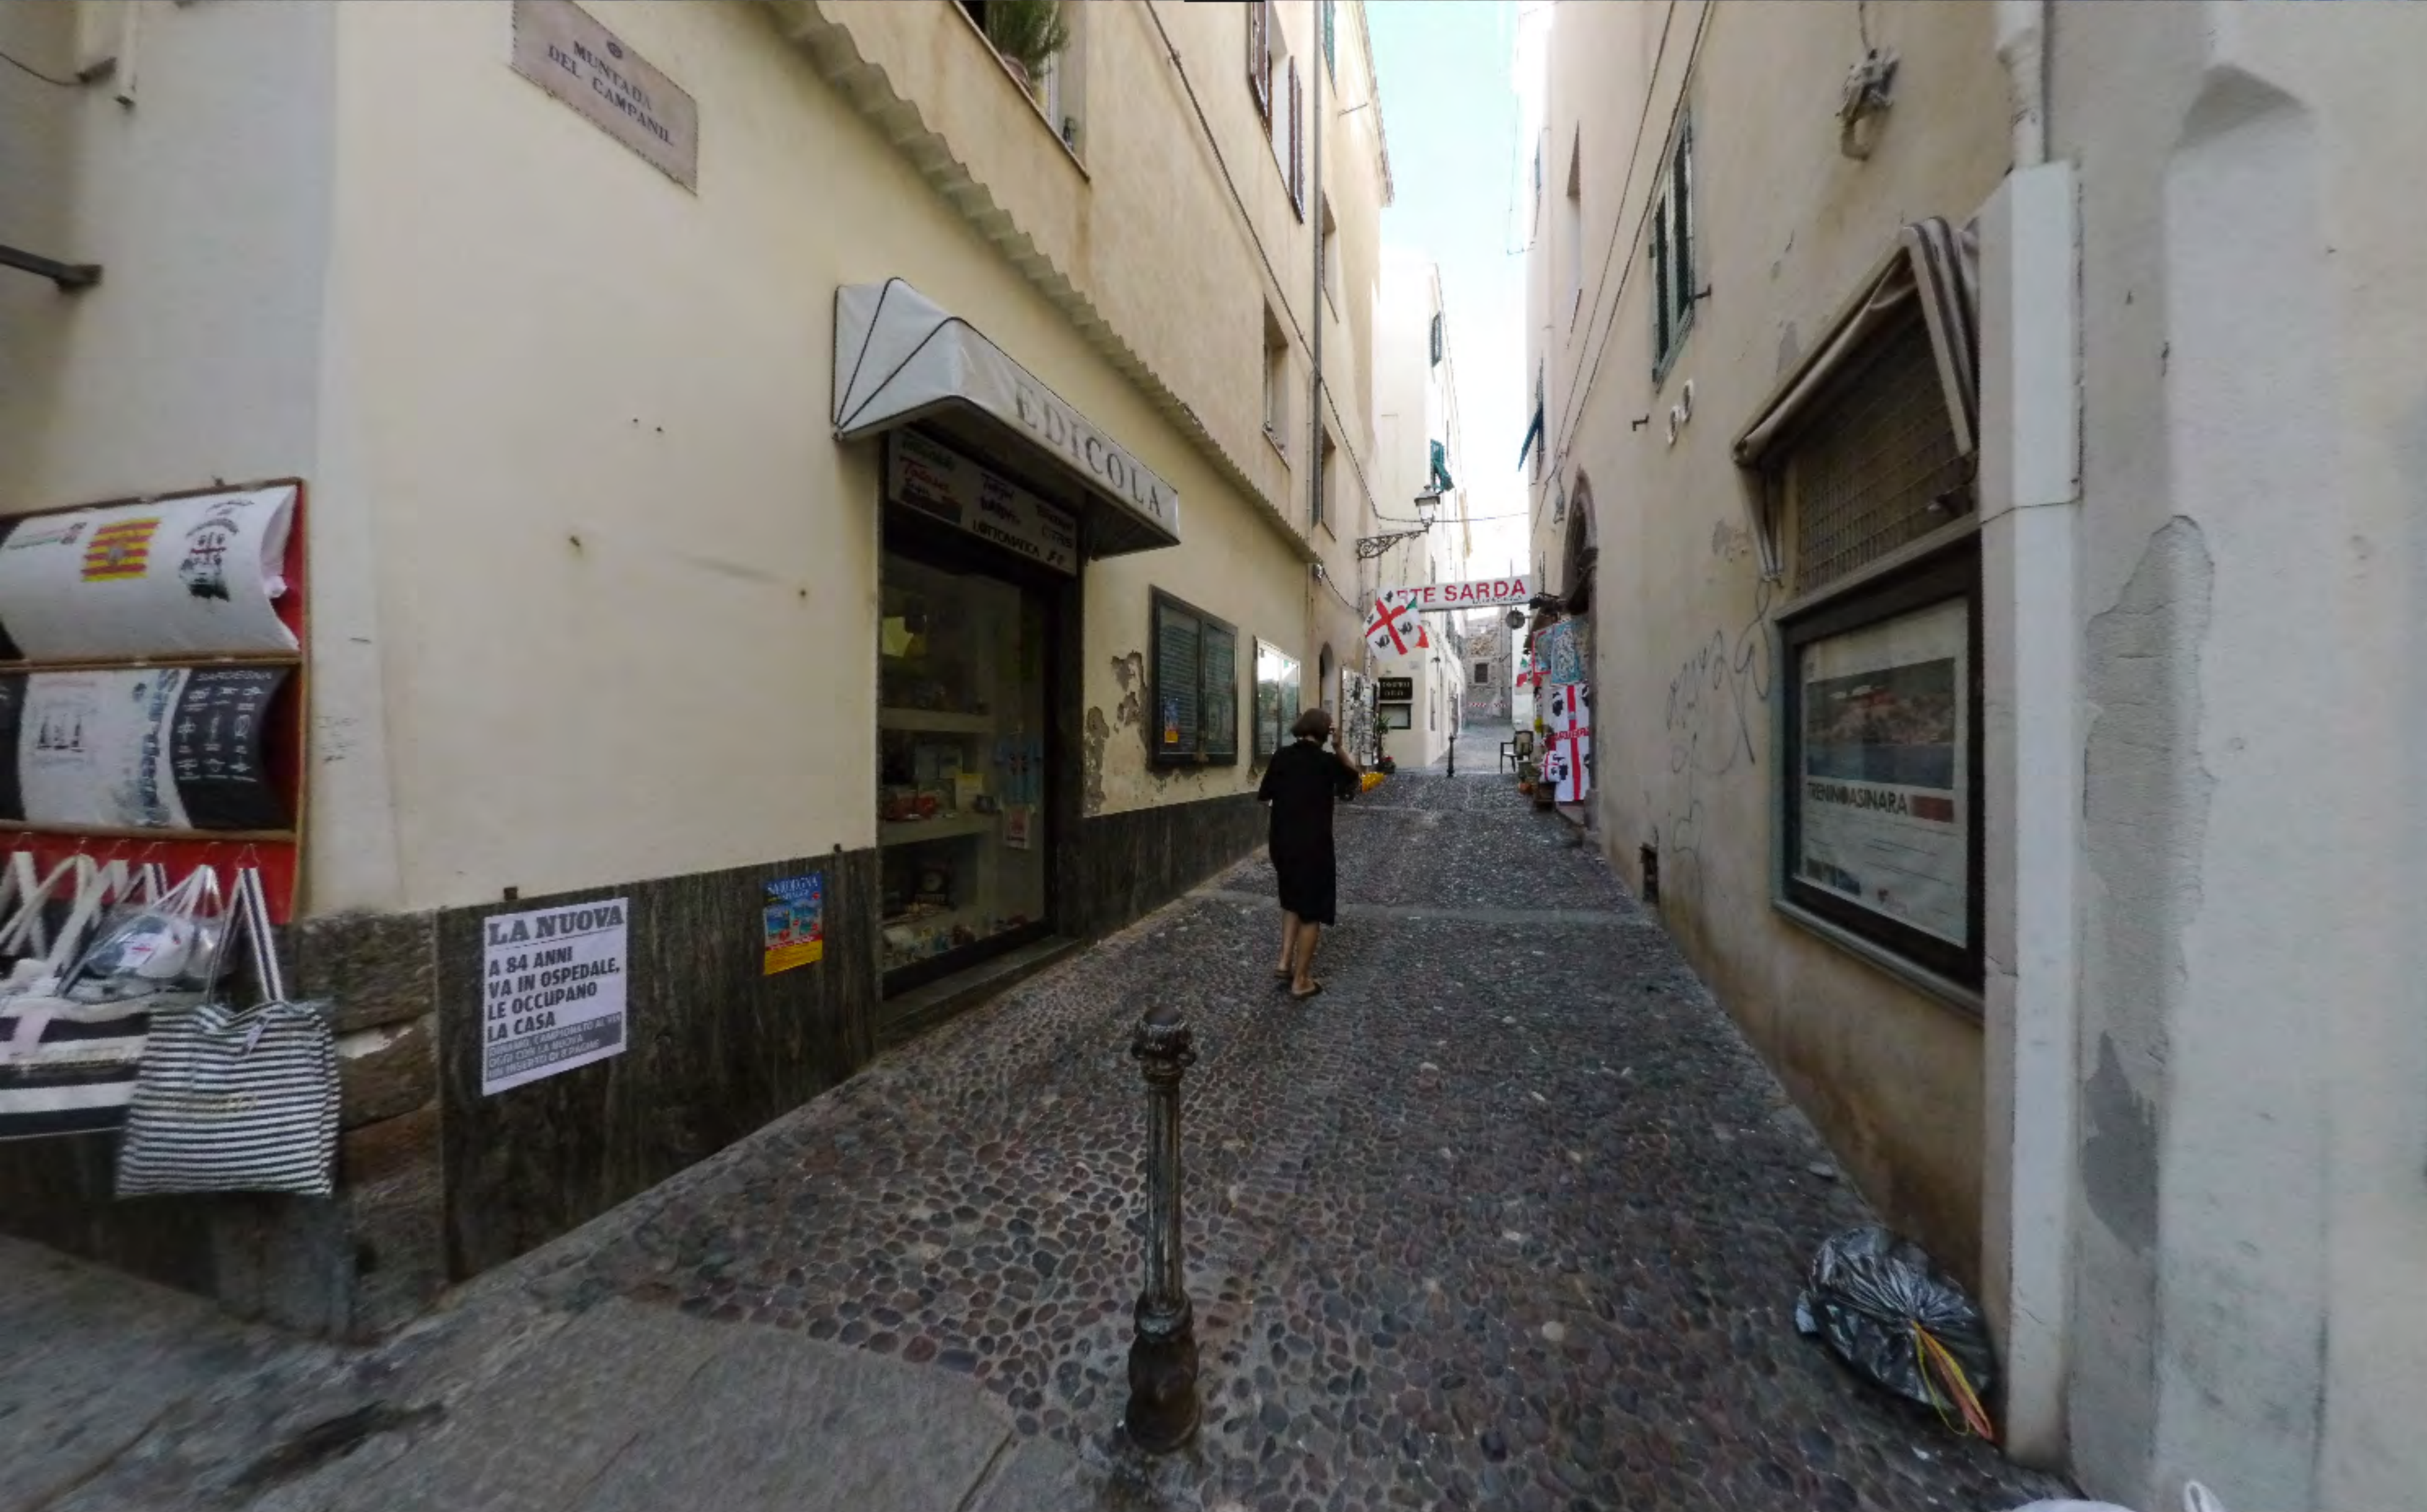

C

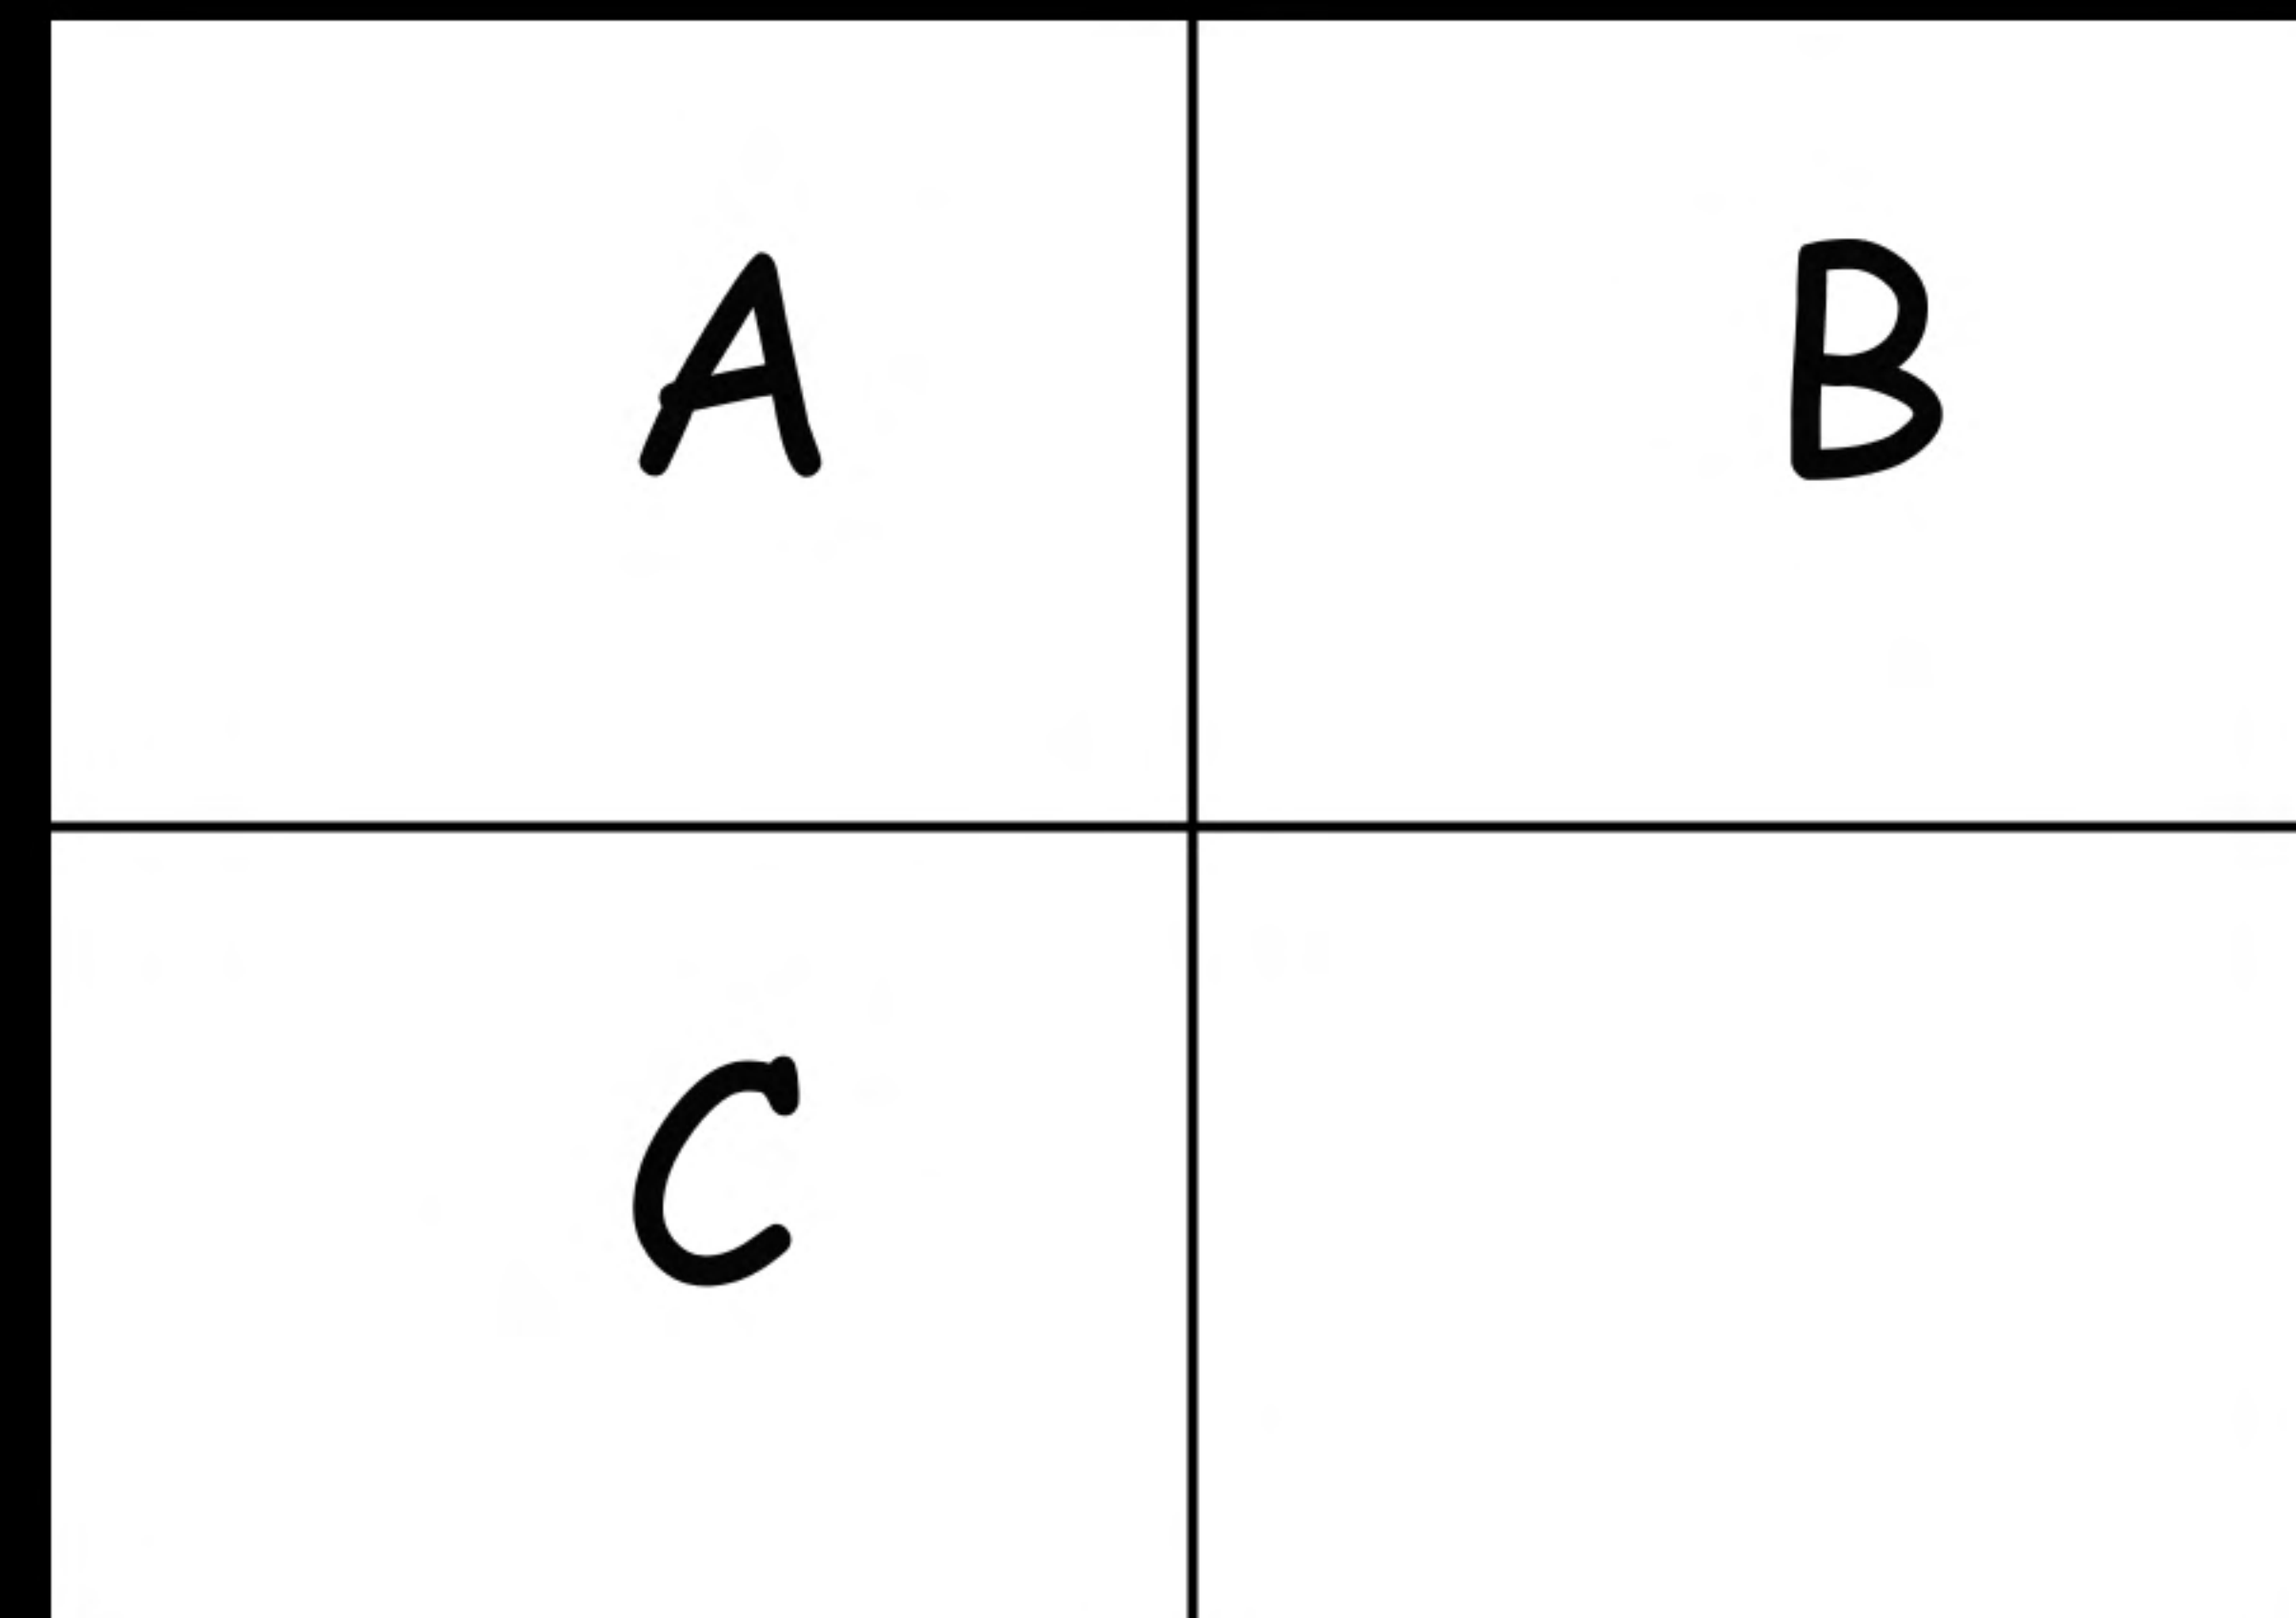



A

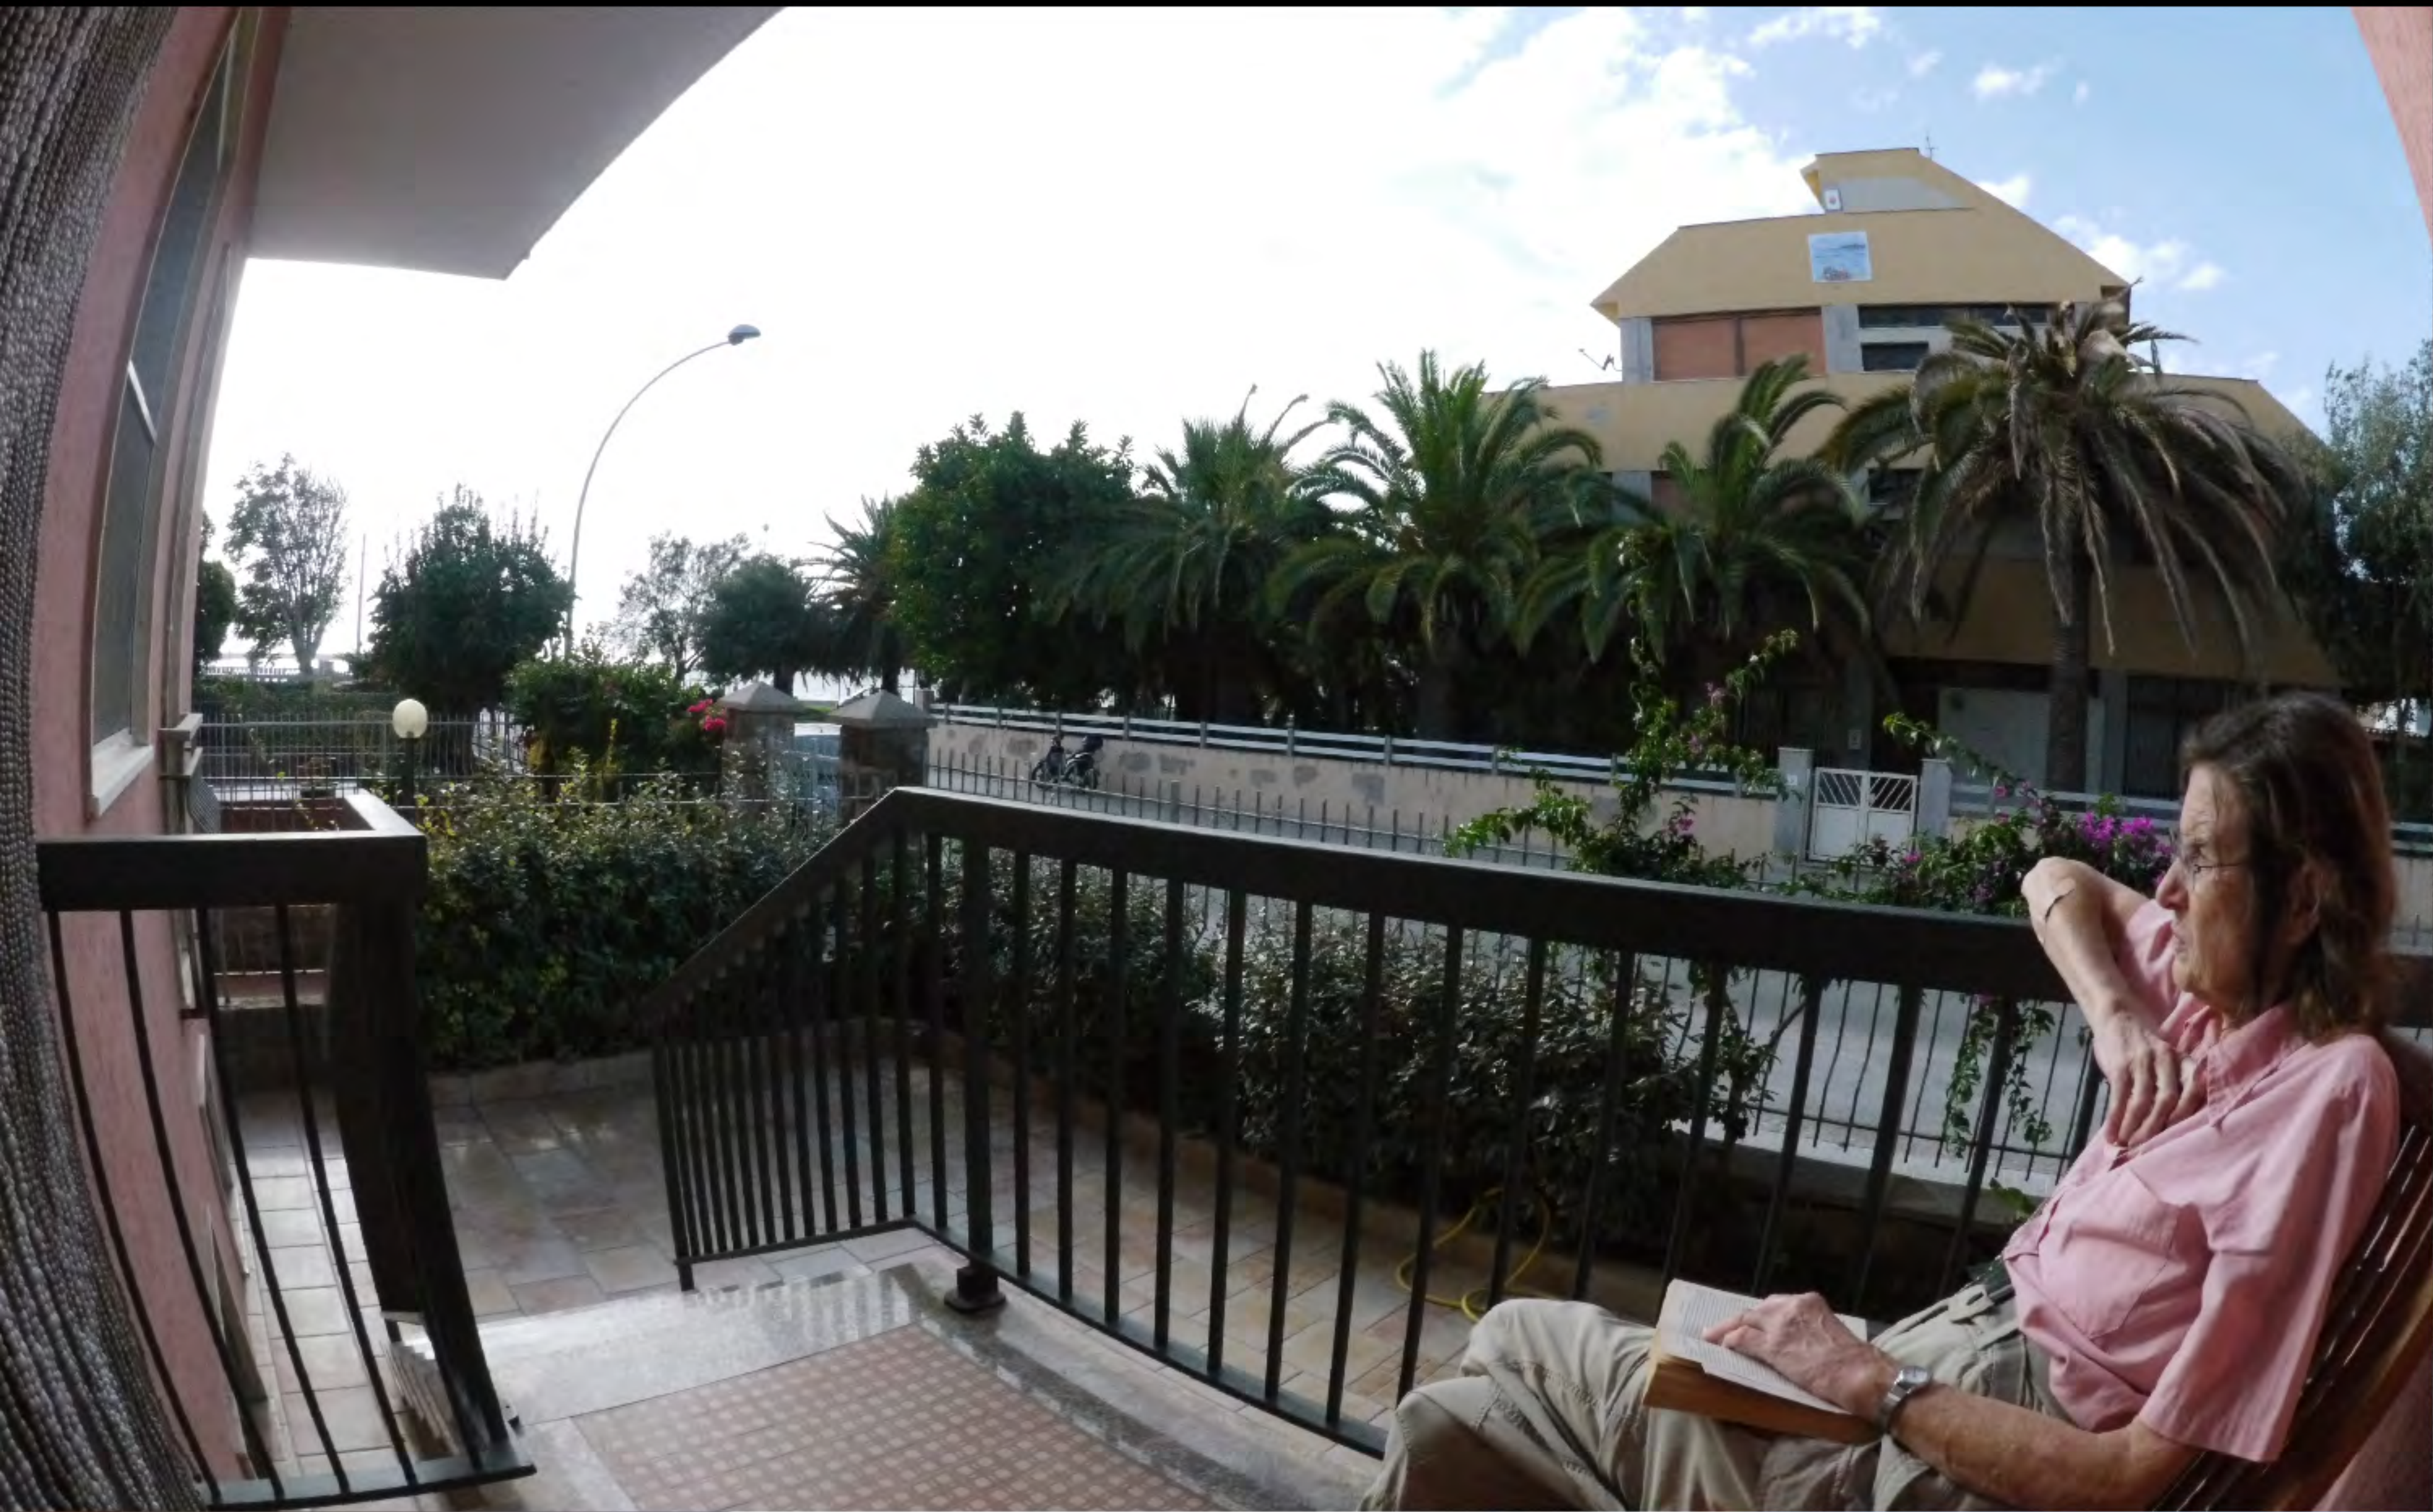

B

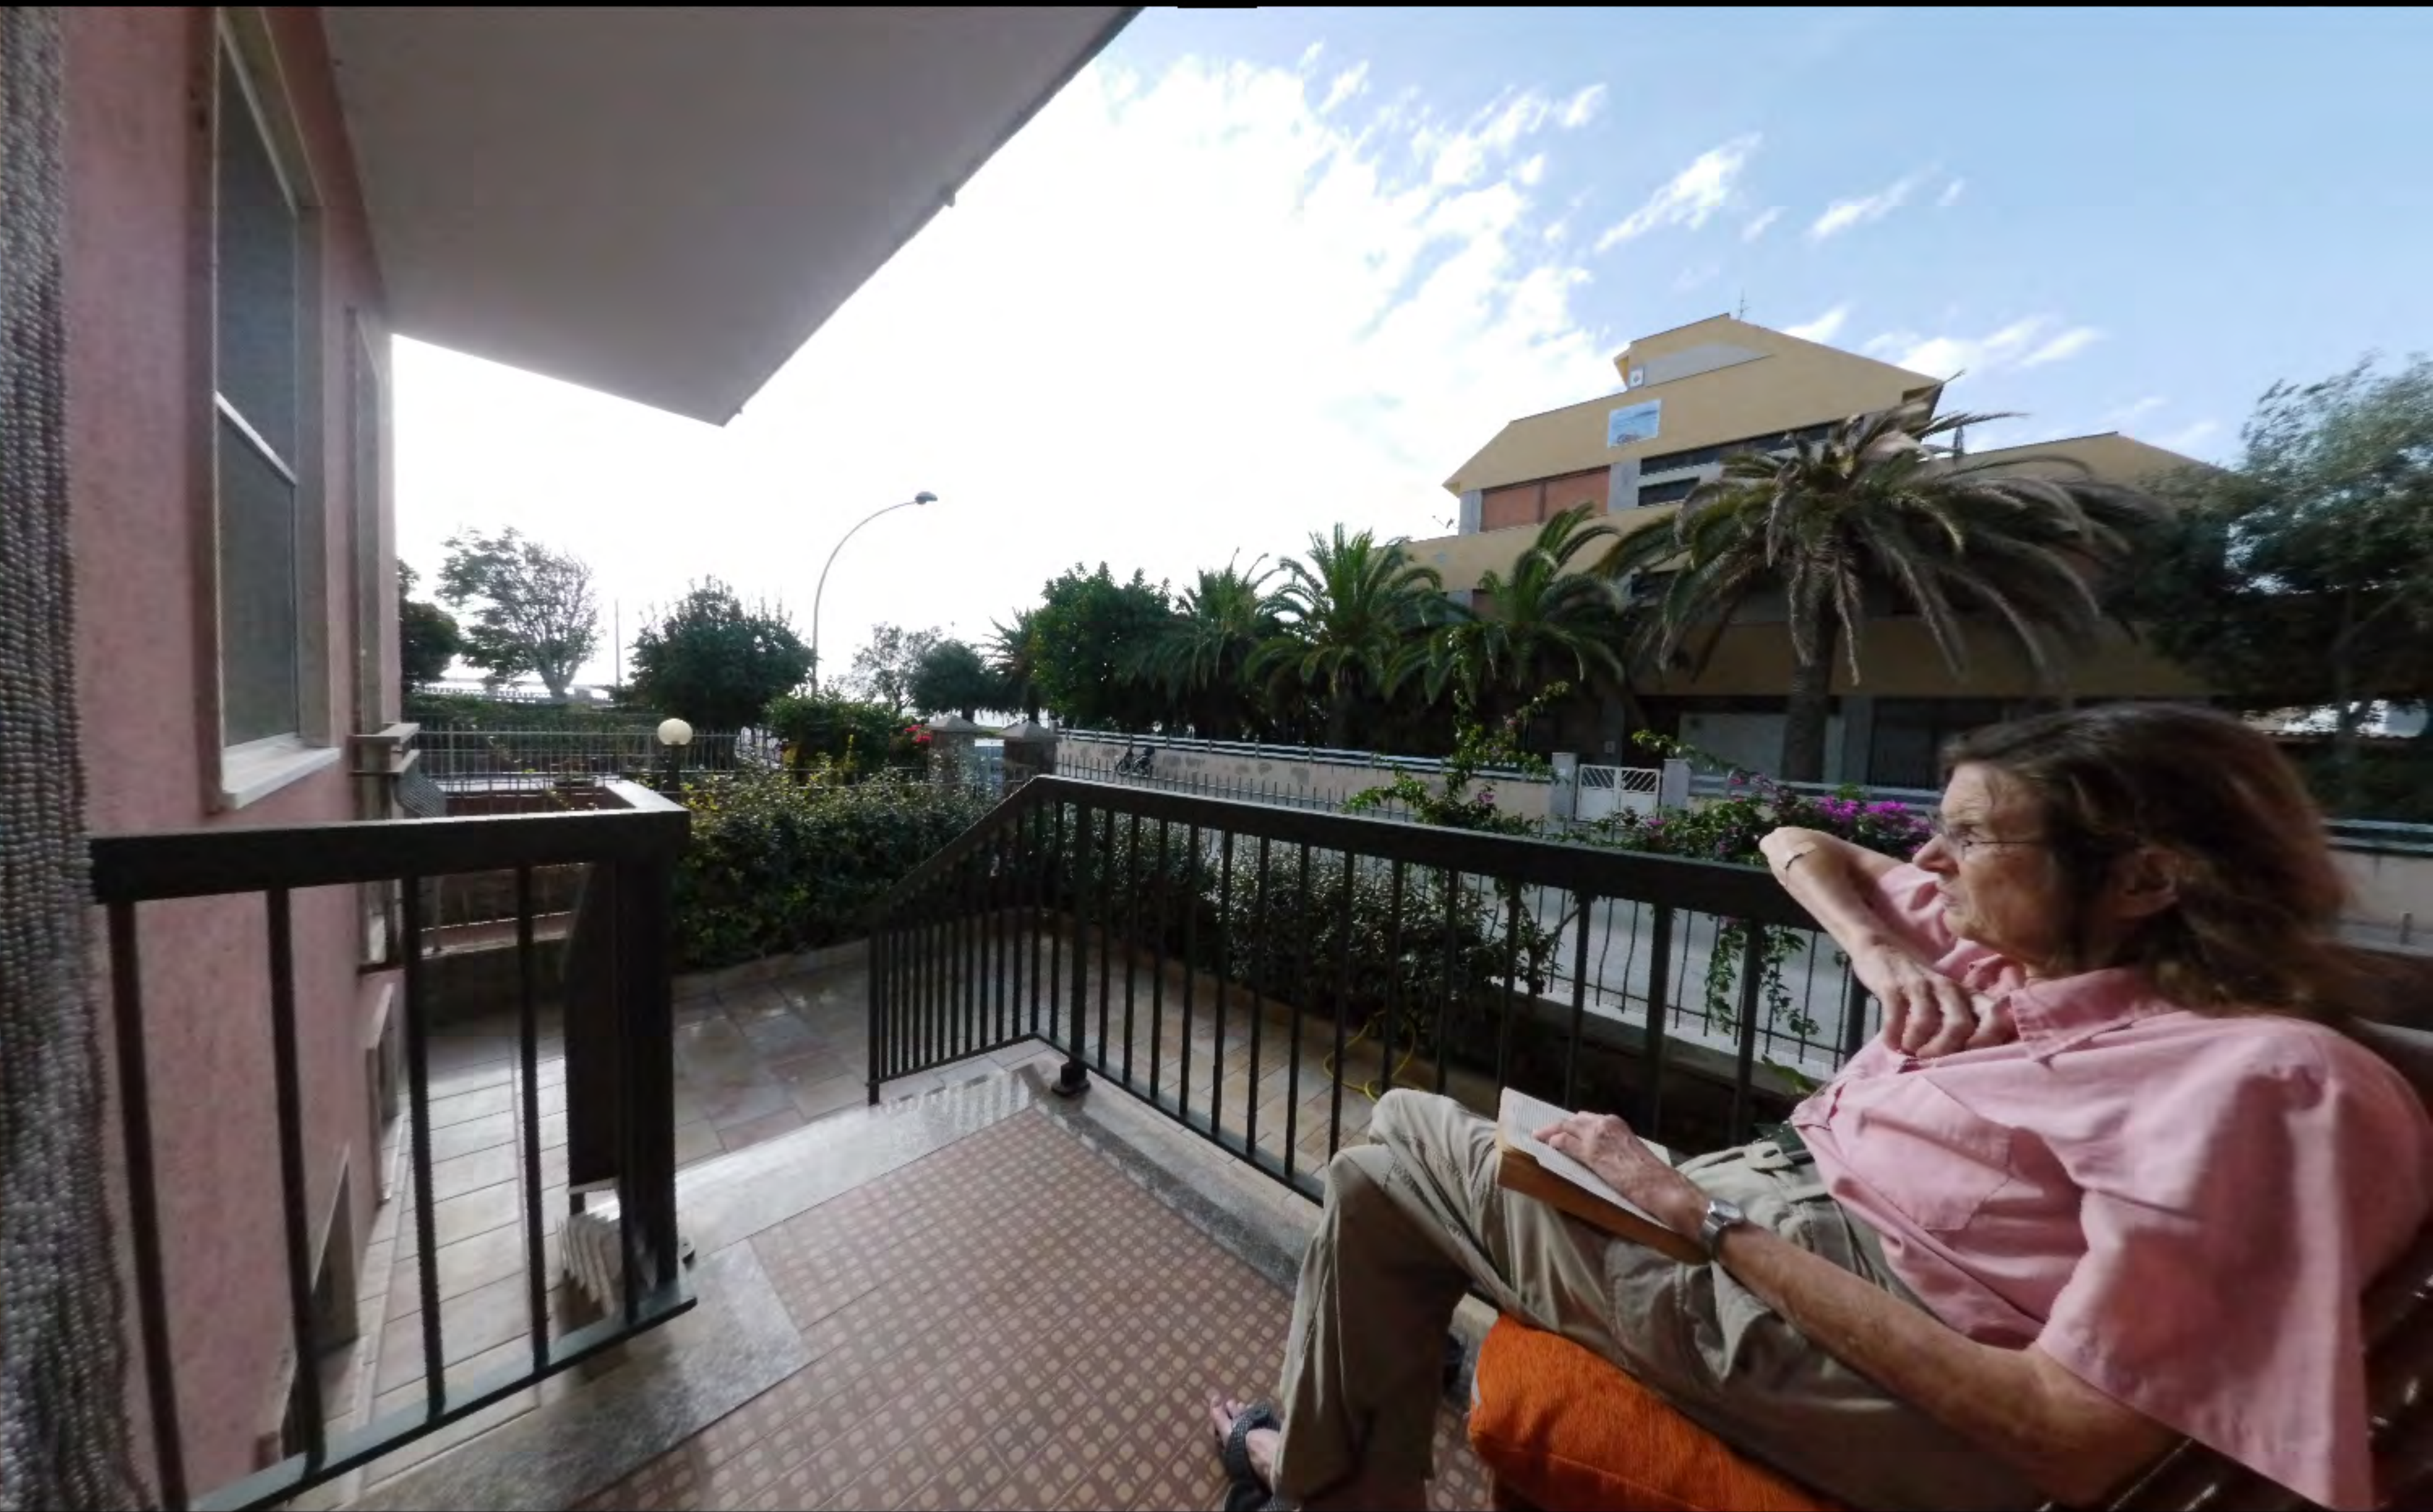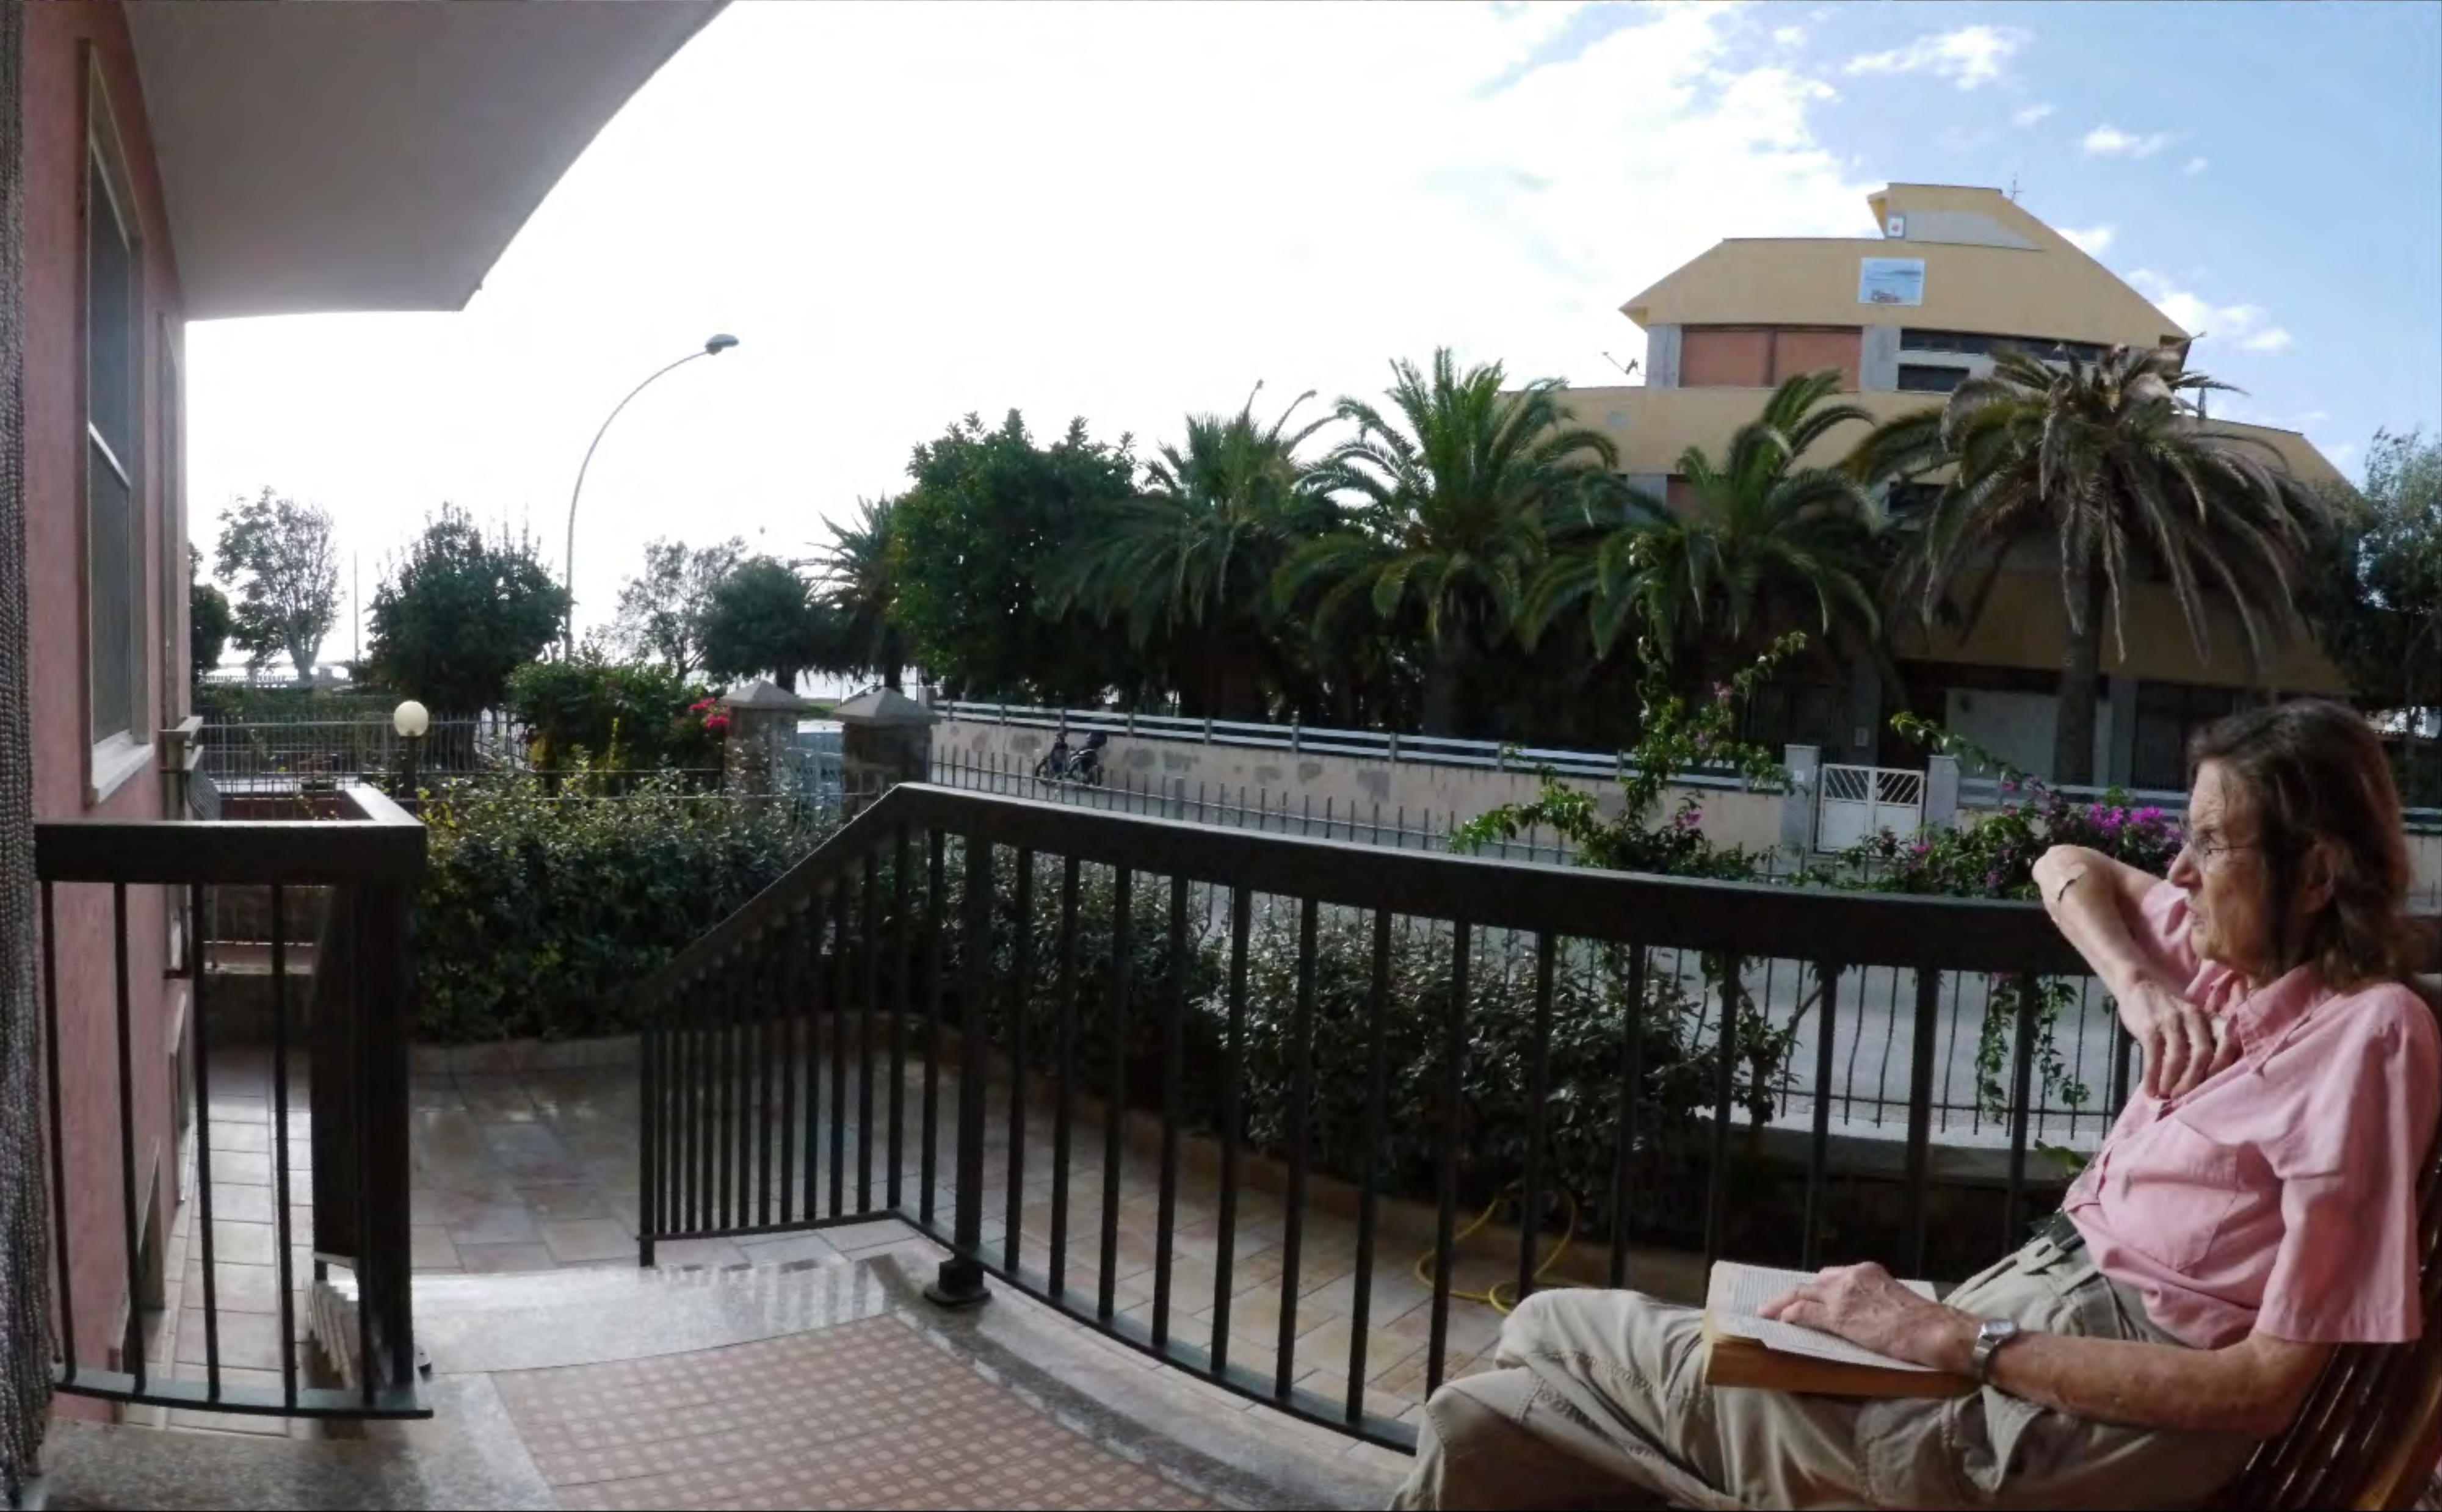

C

|   |   |
|---|---|
| A | B |
| C |   |



A

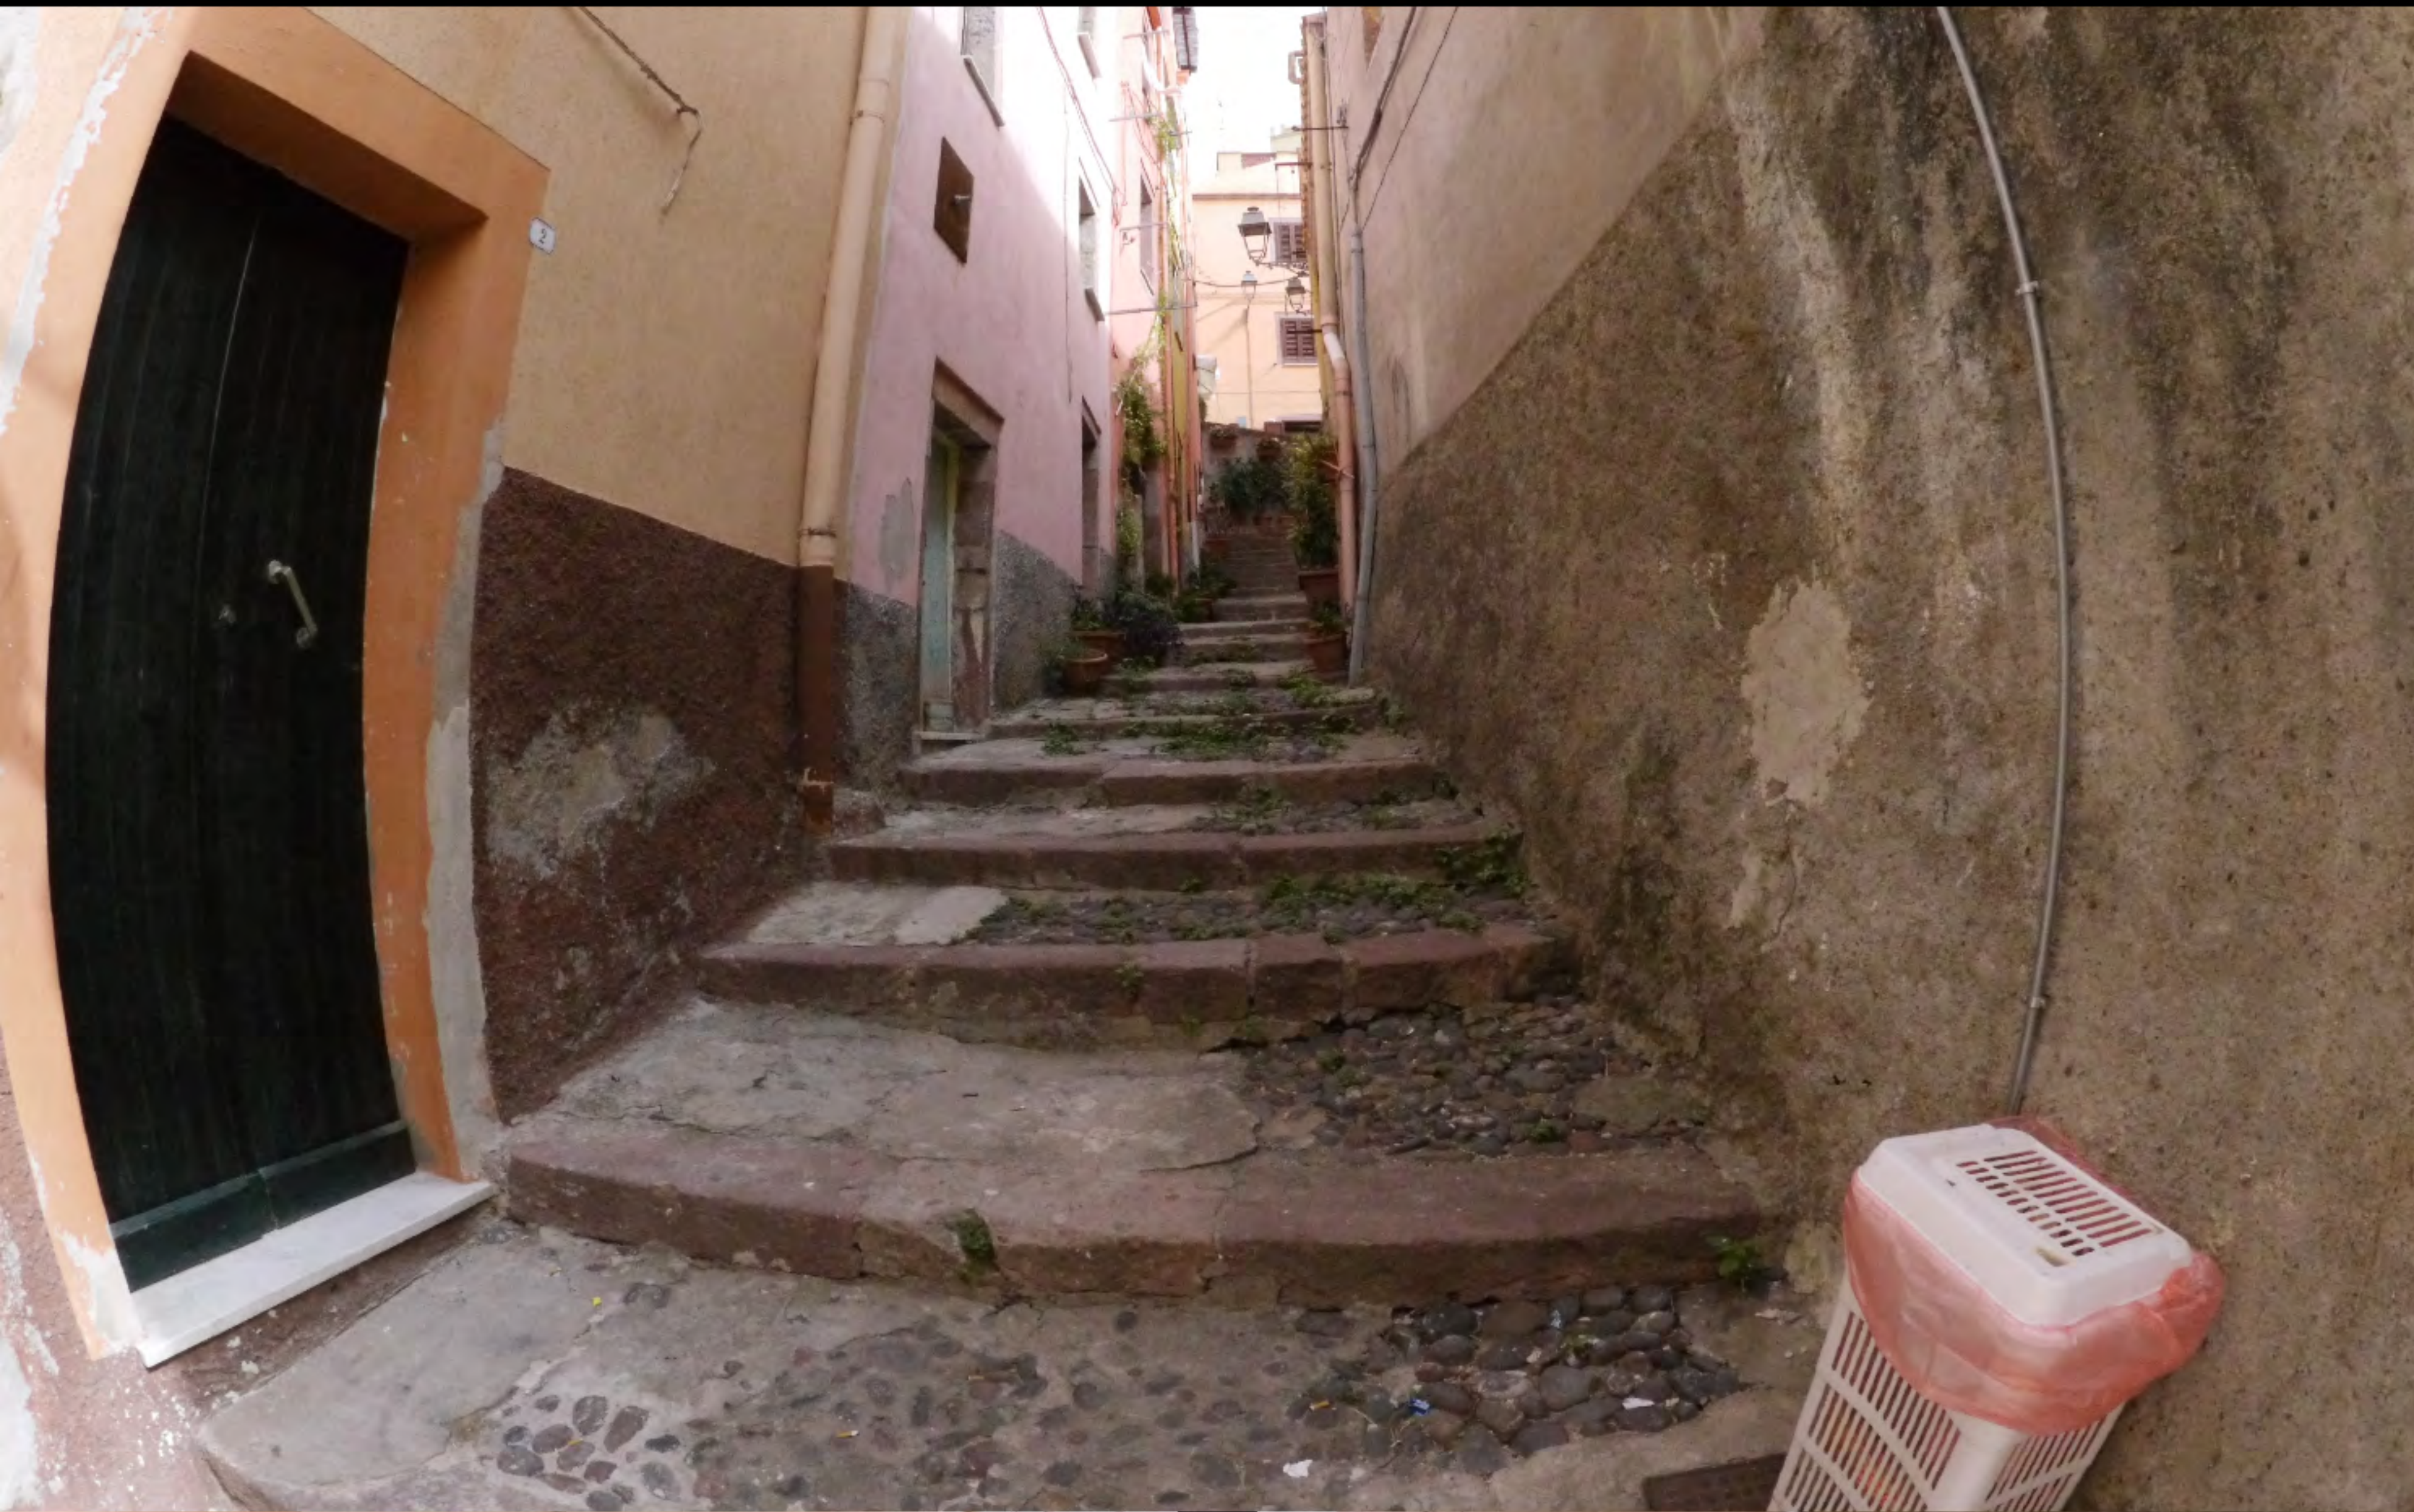

B

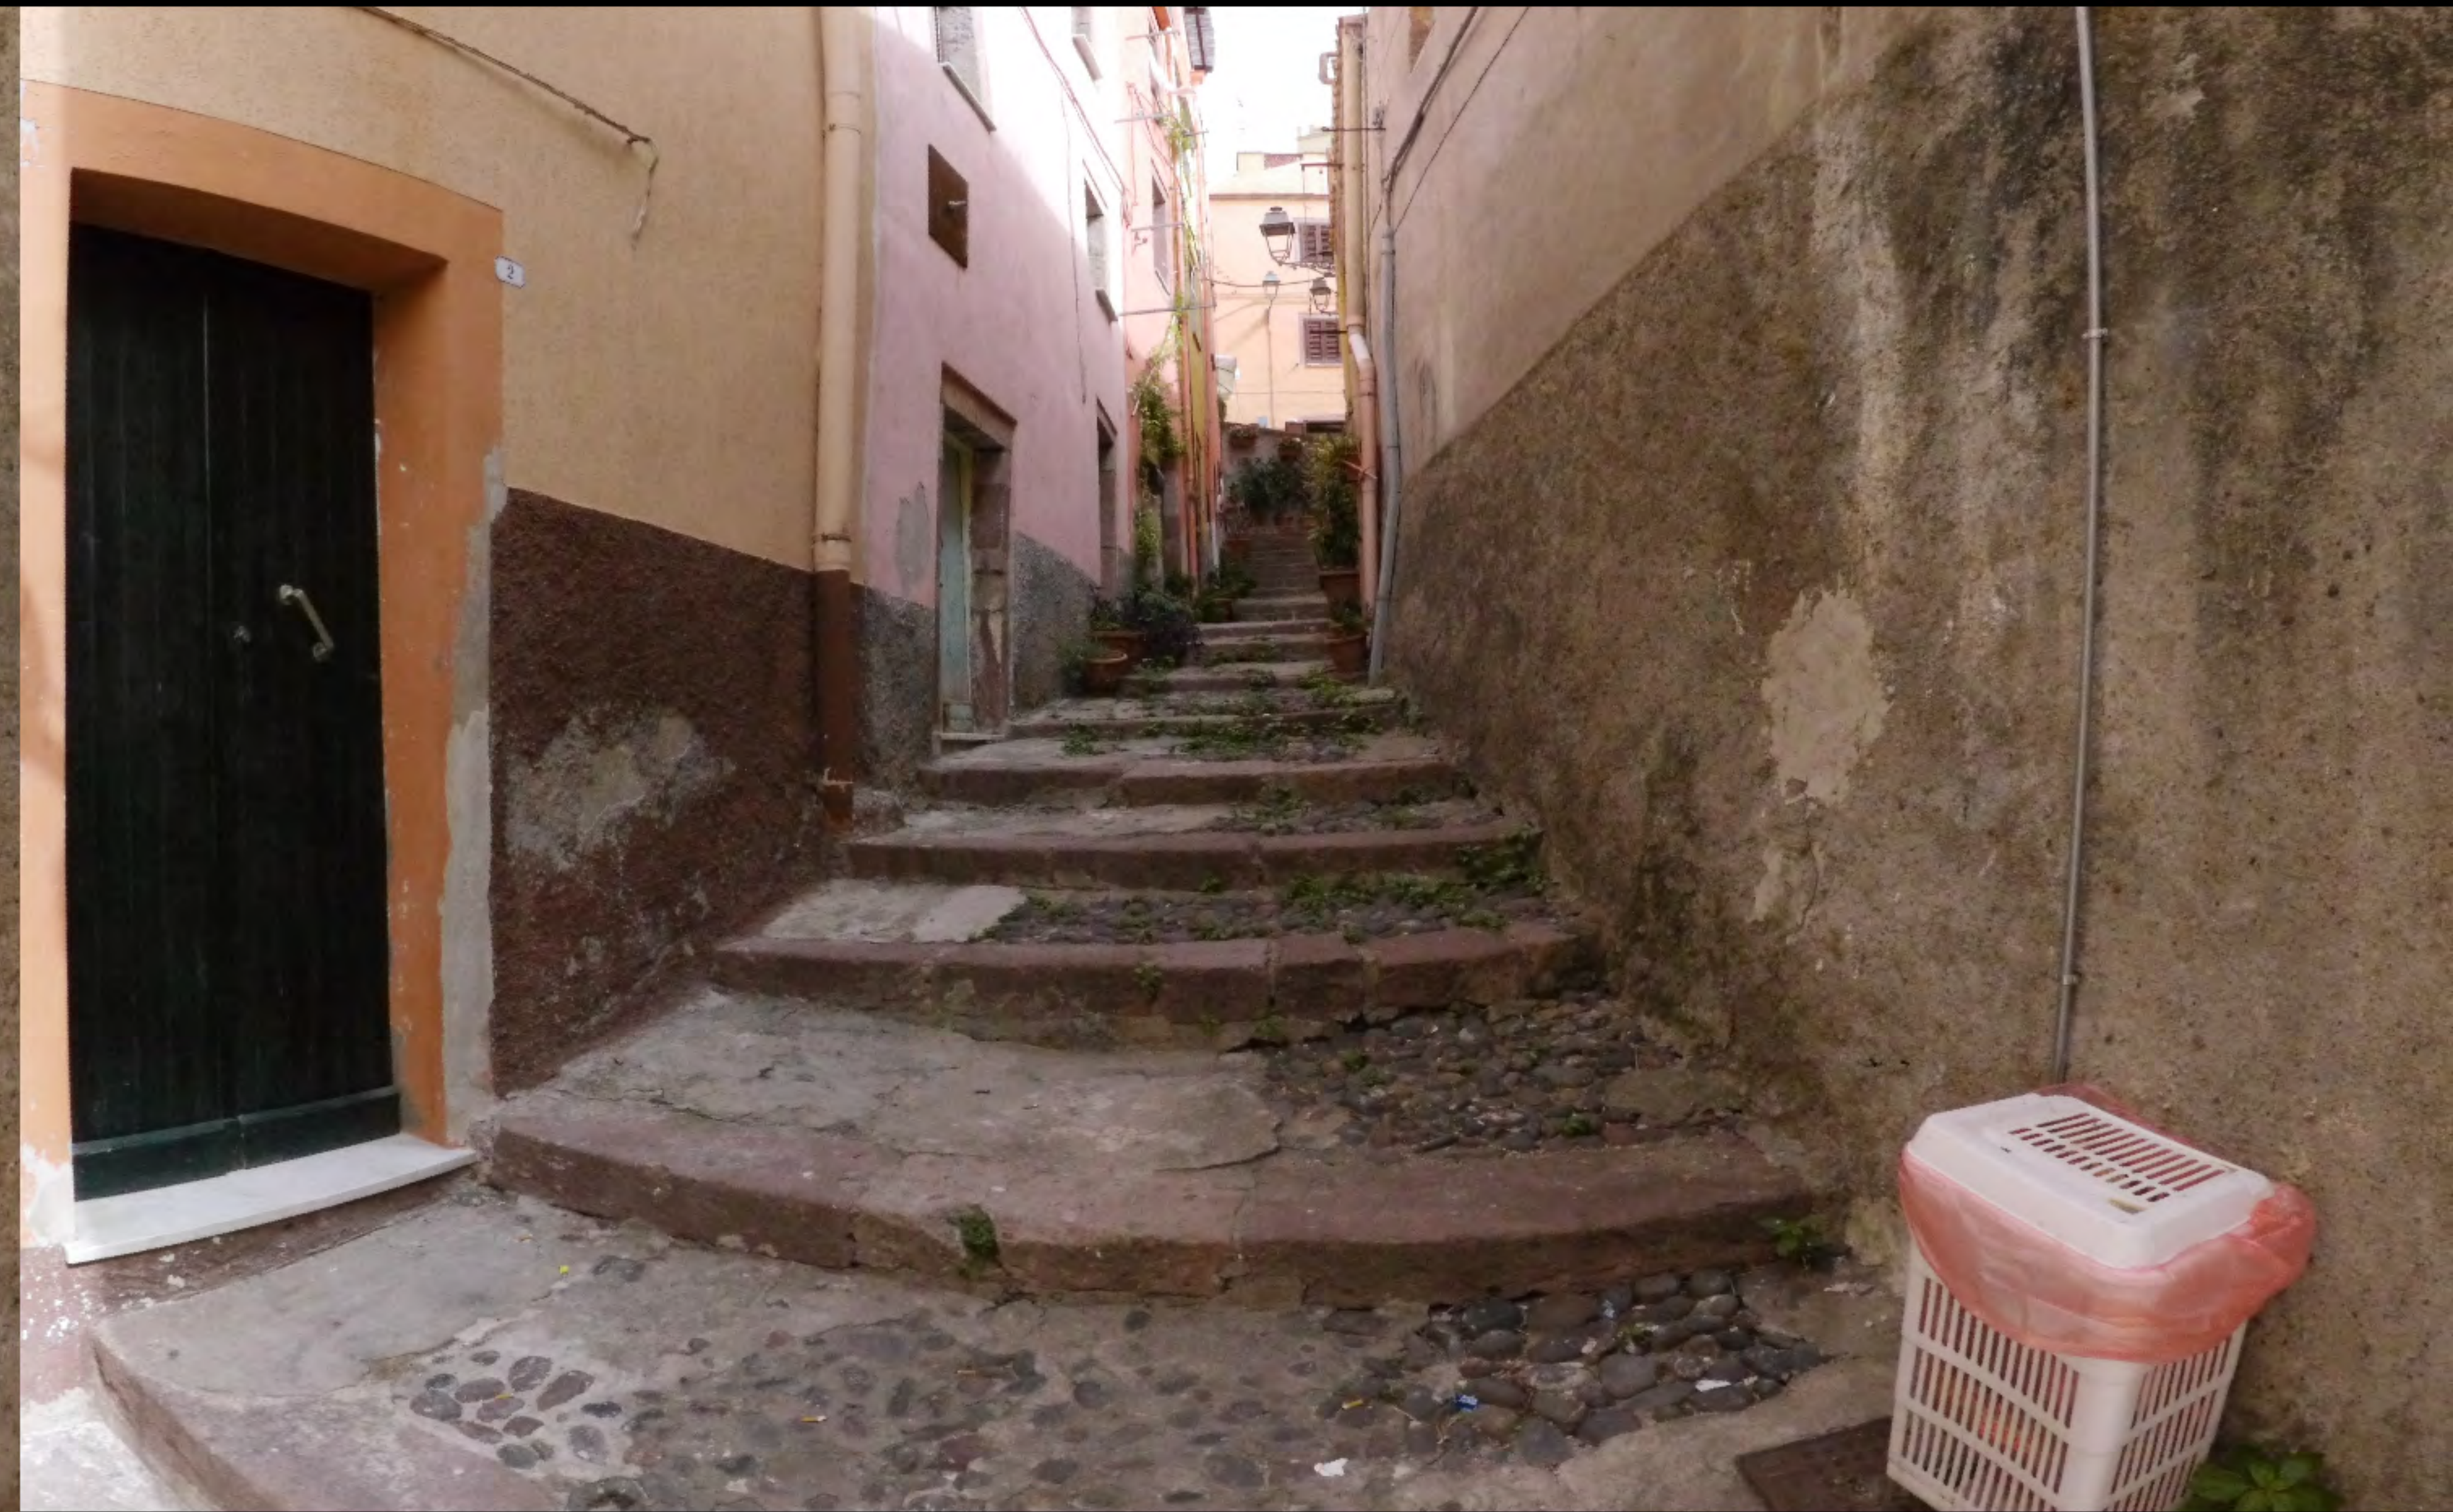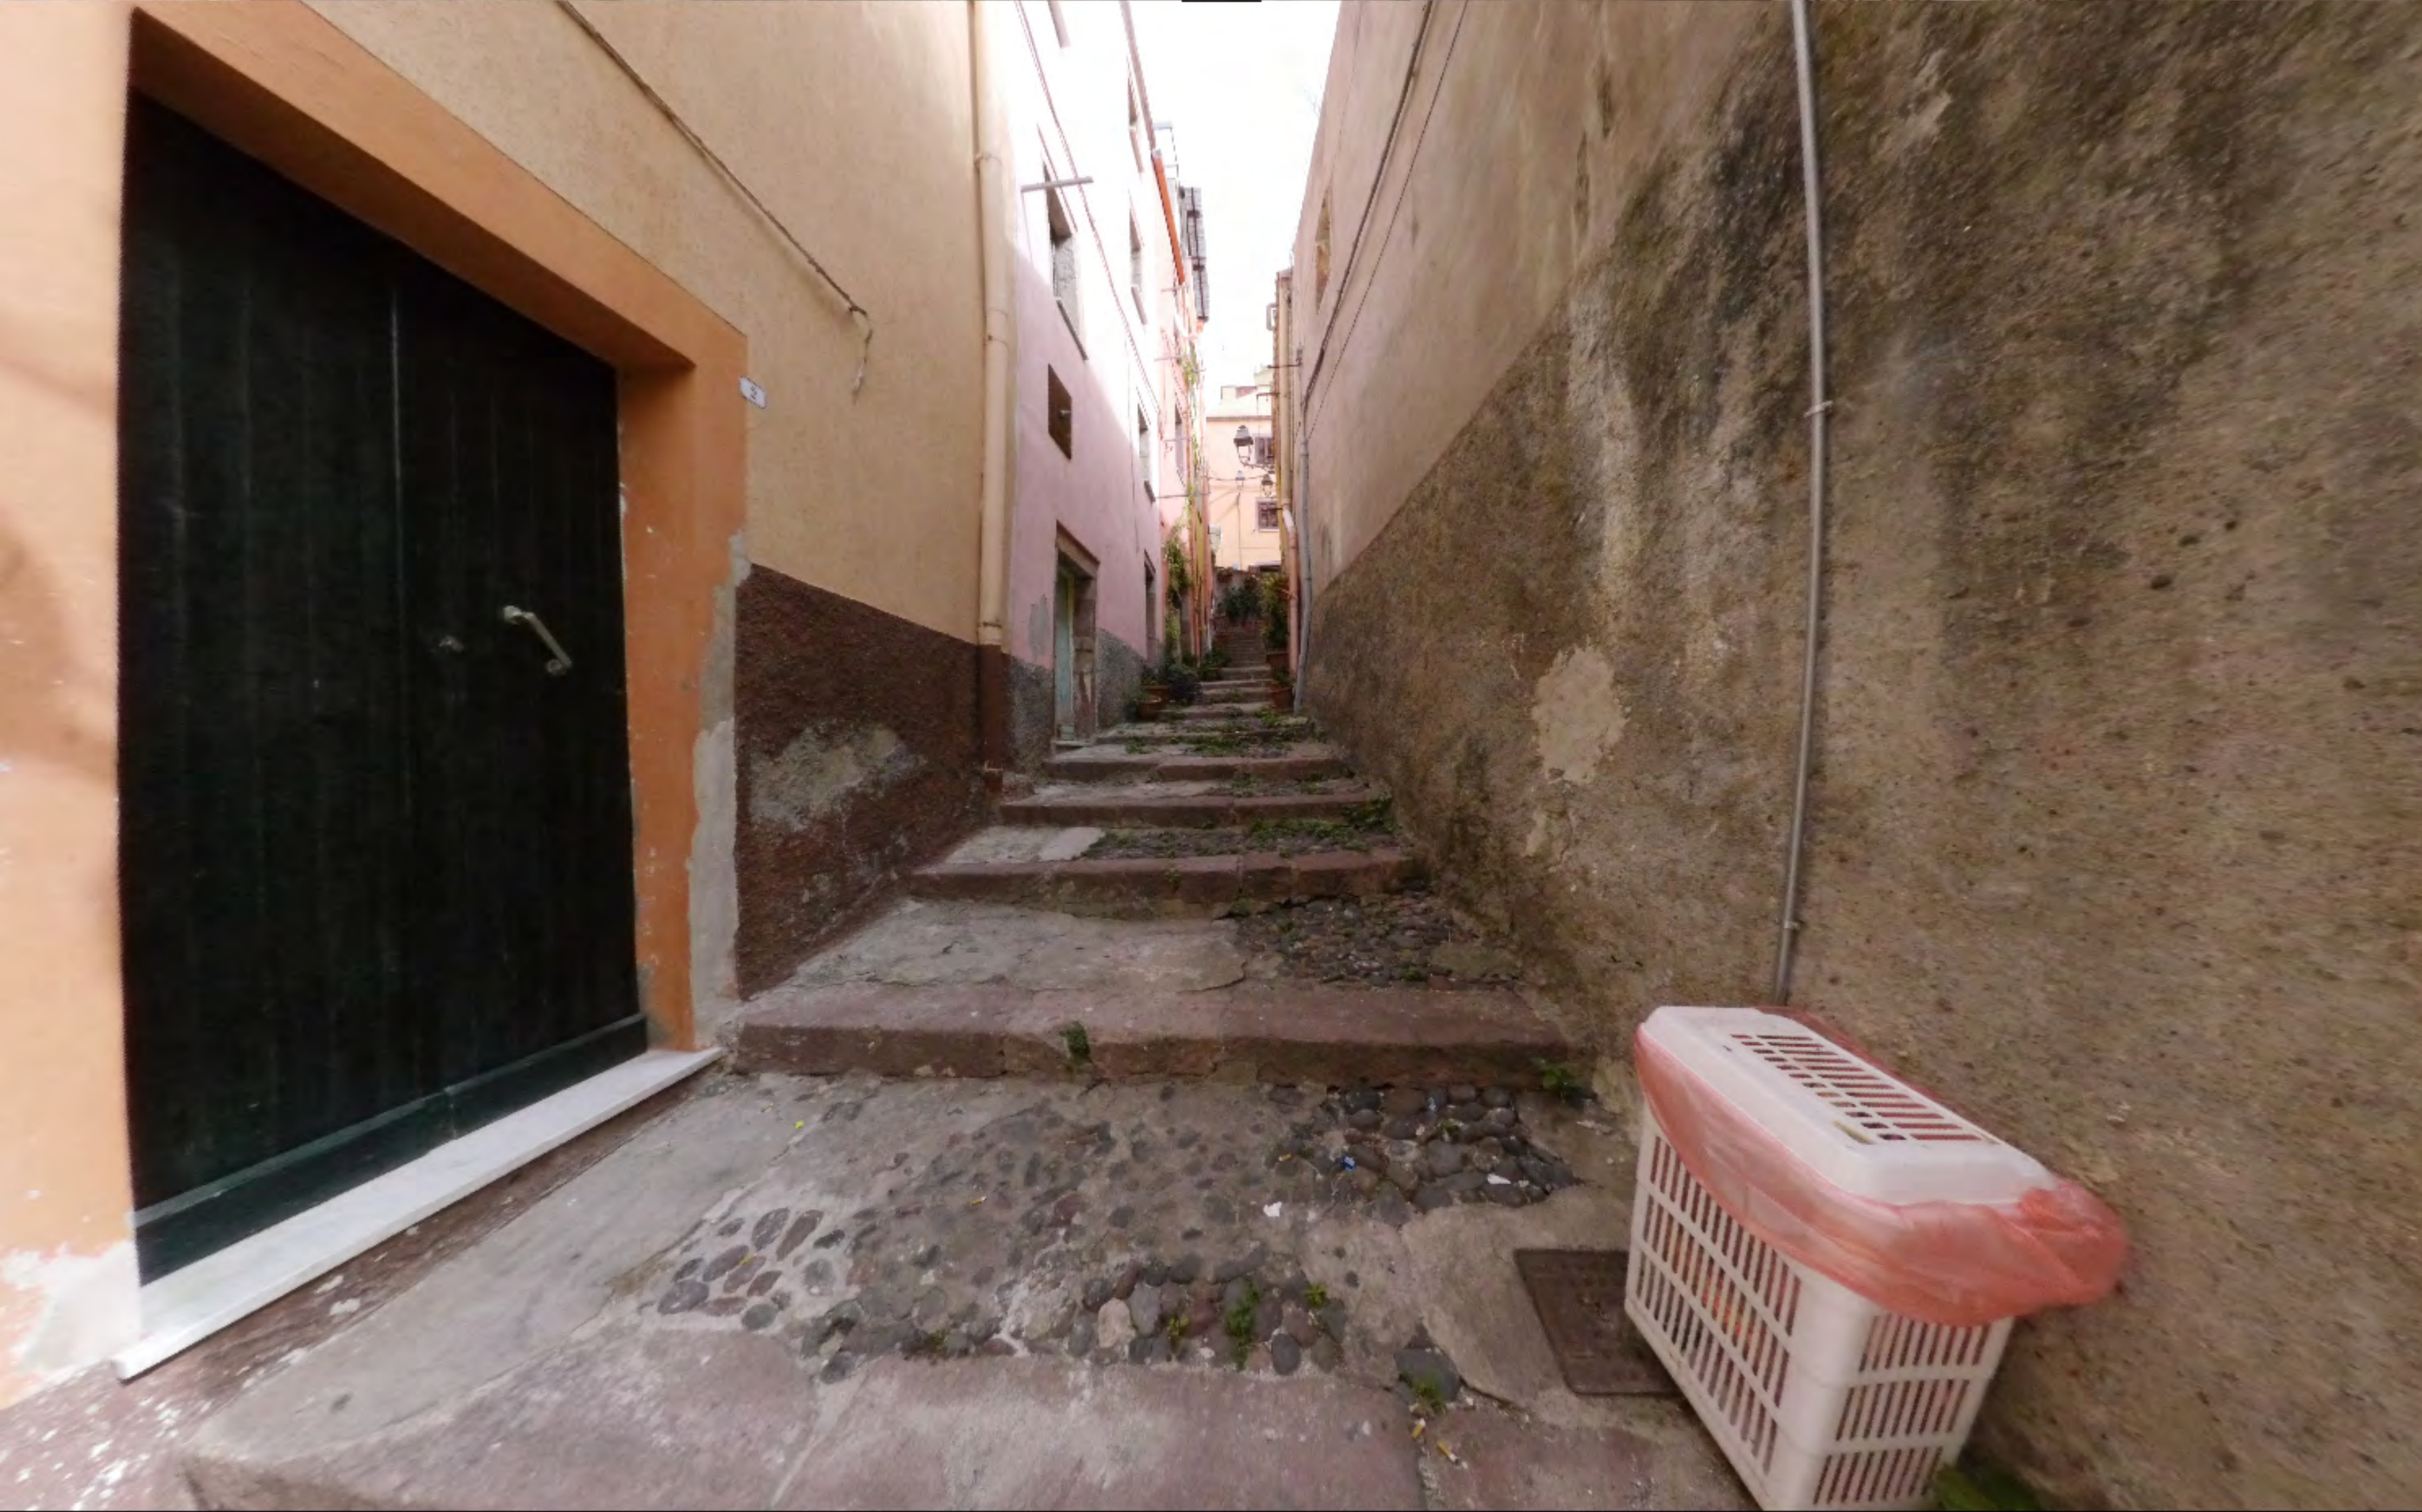

C

|   |   |
|---|---|
| A | B |
| C |   |



A

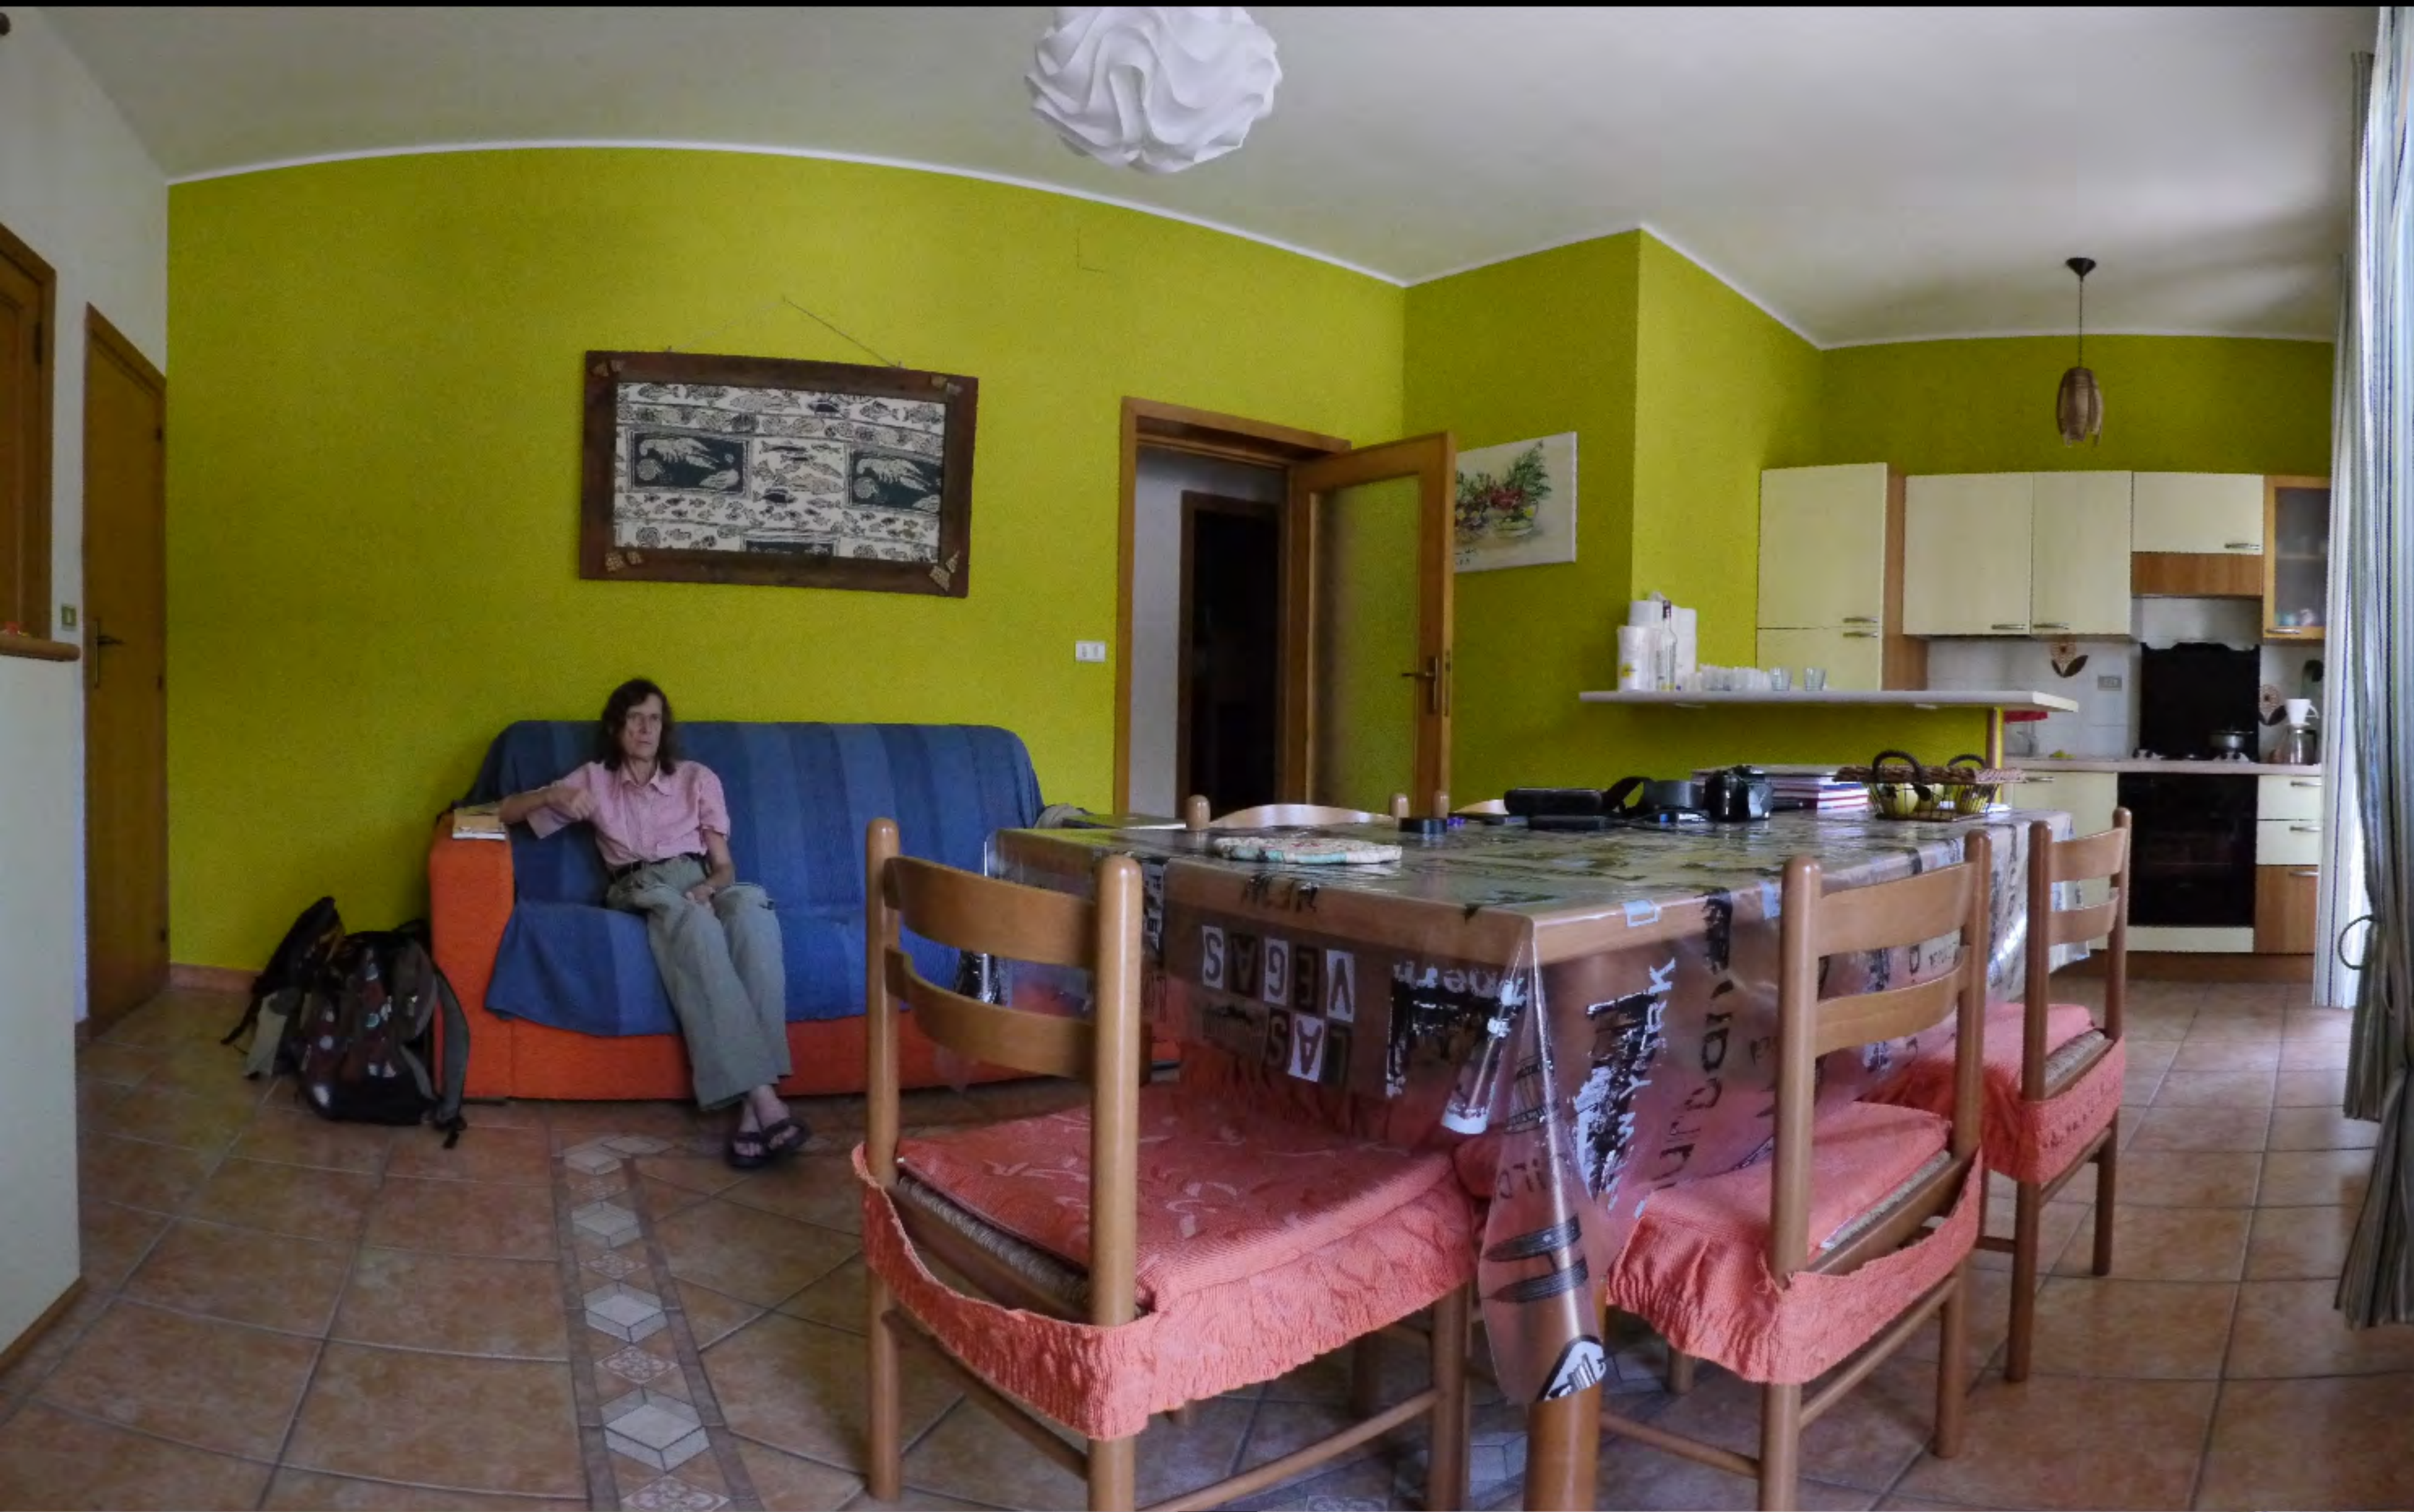

B

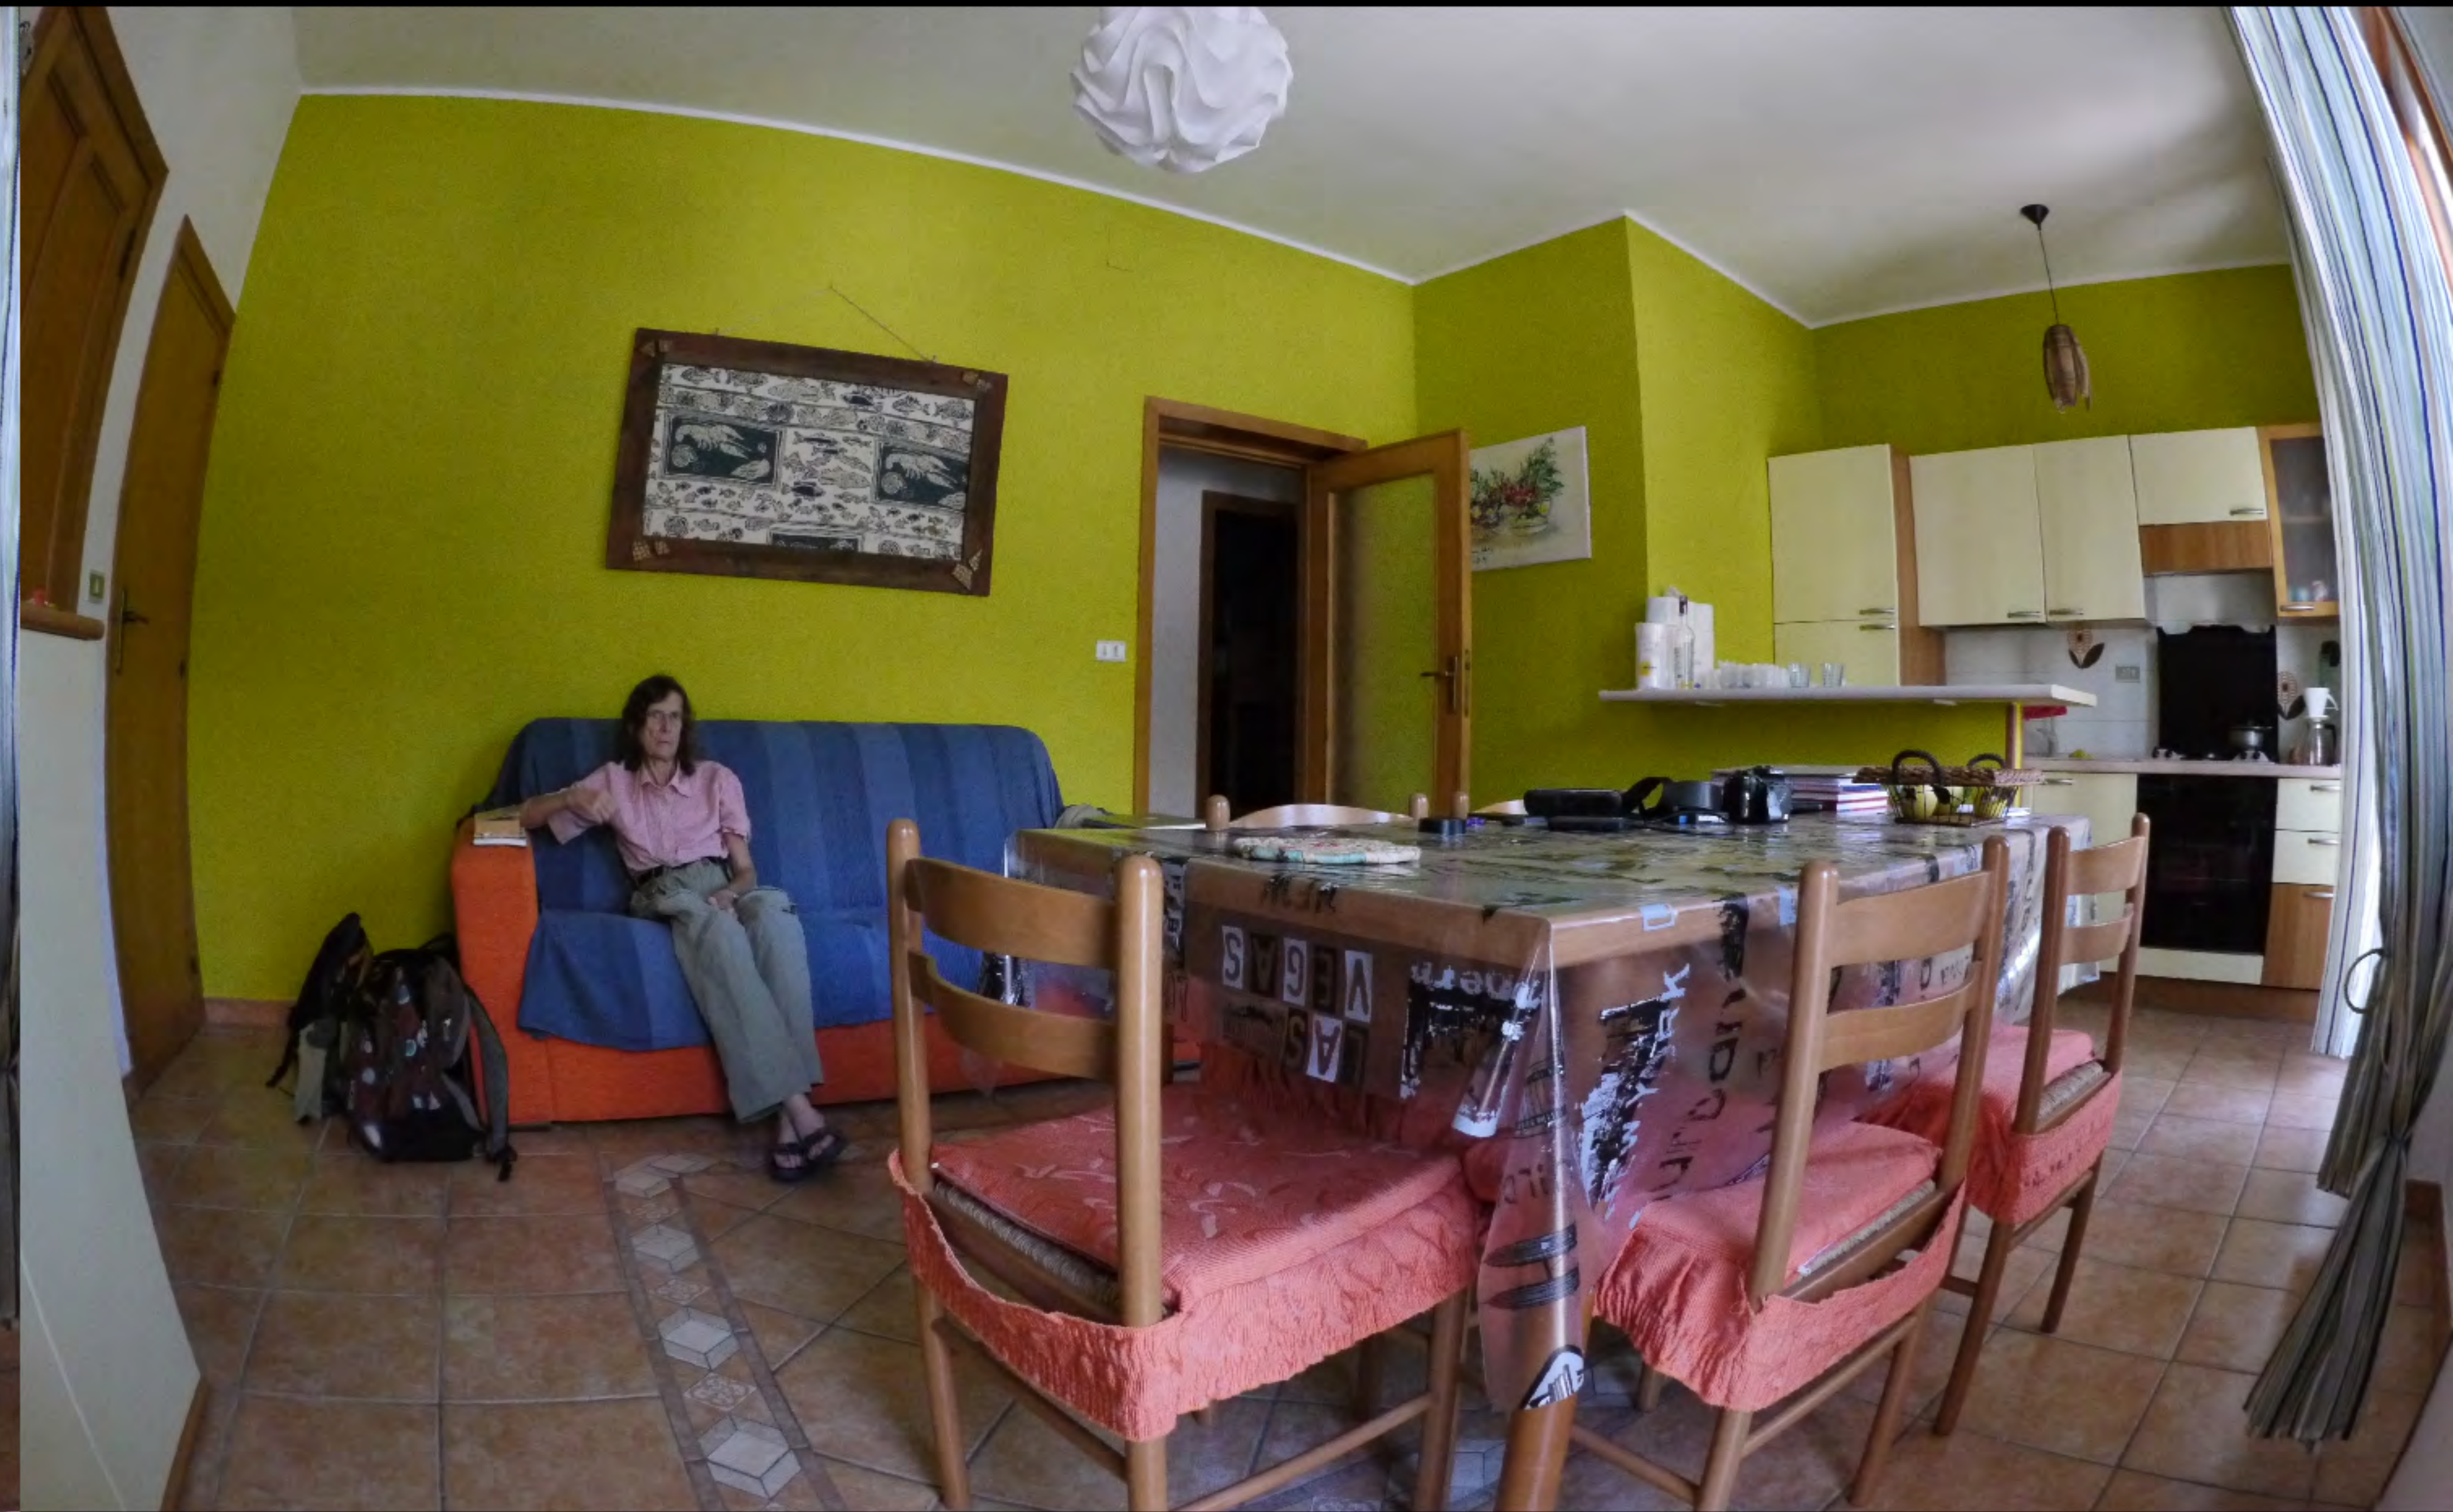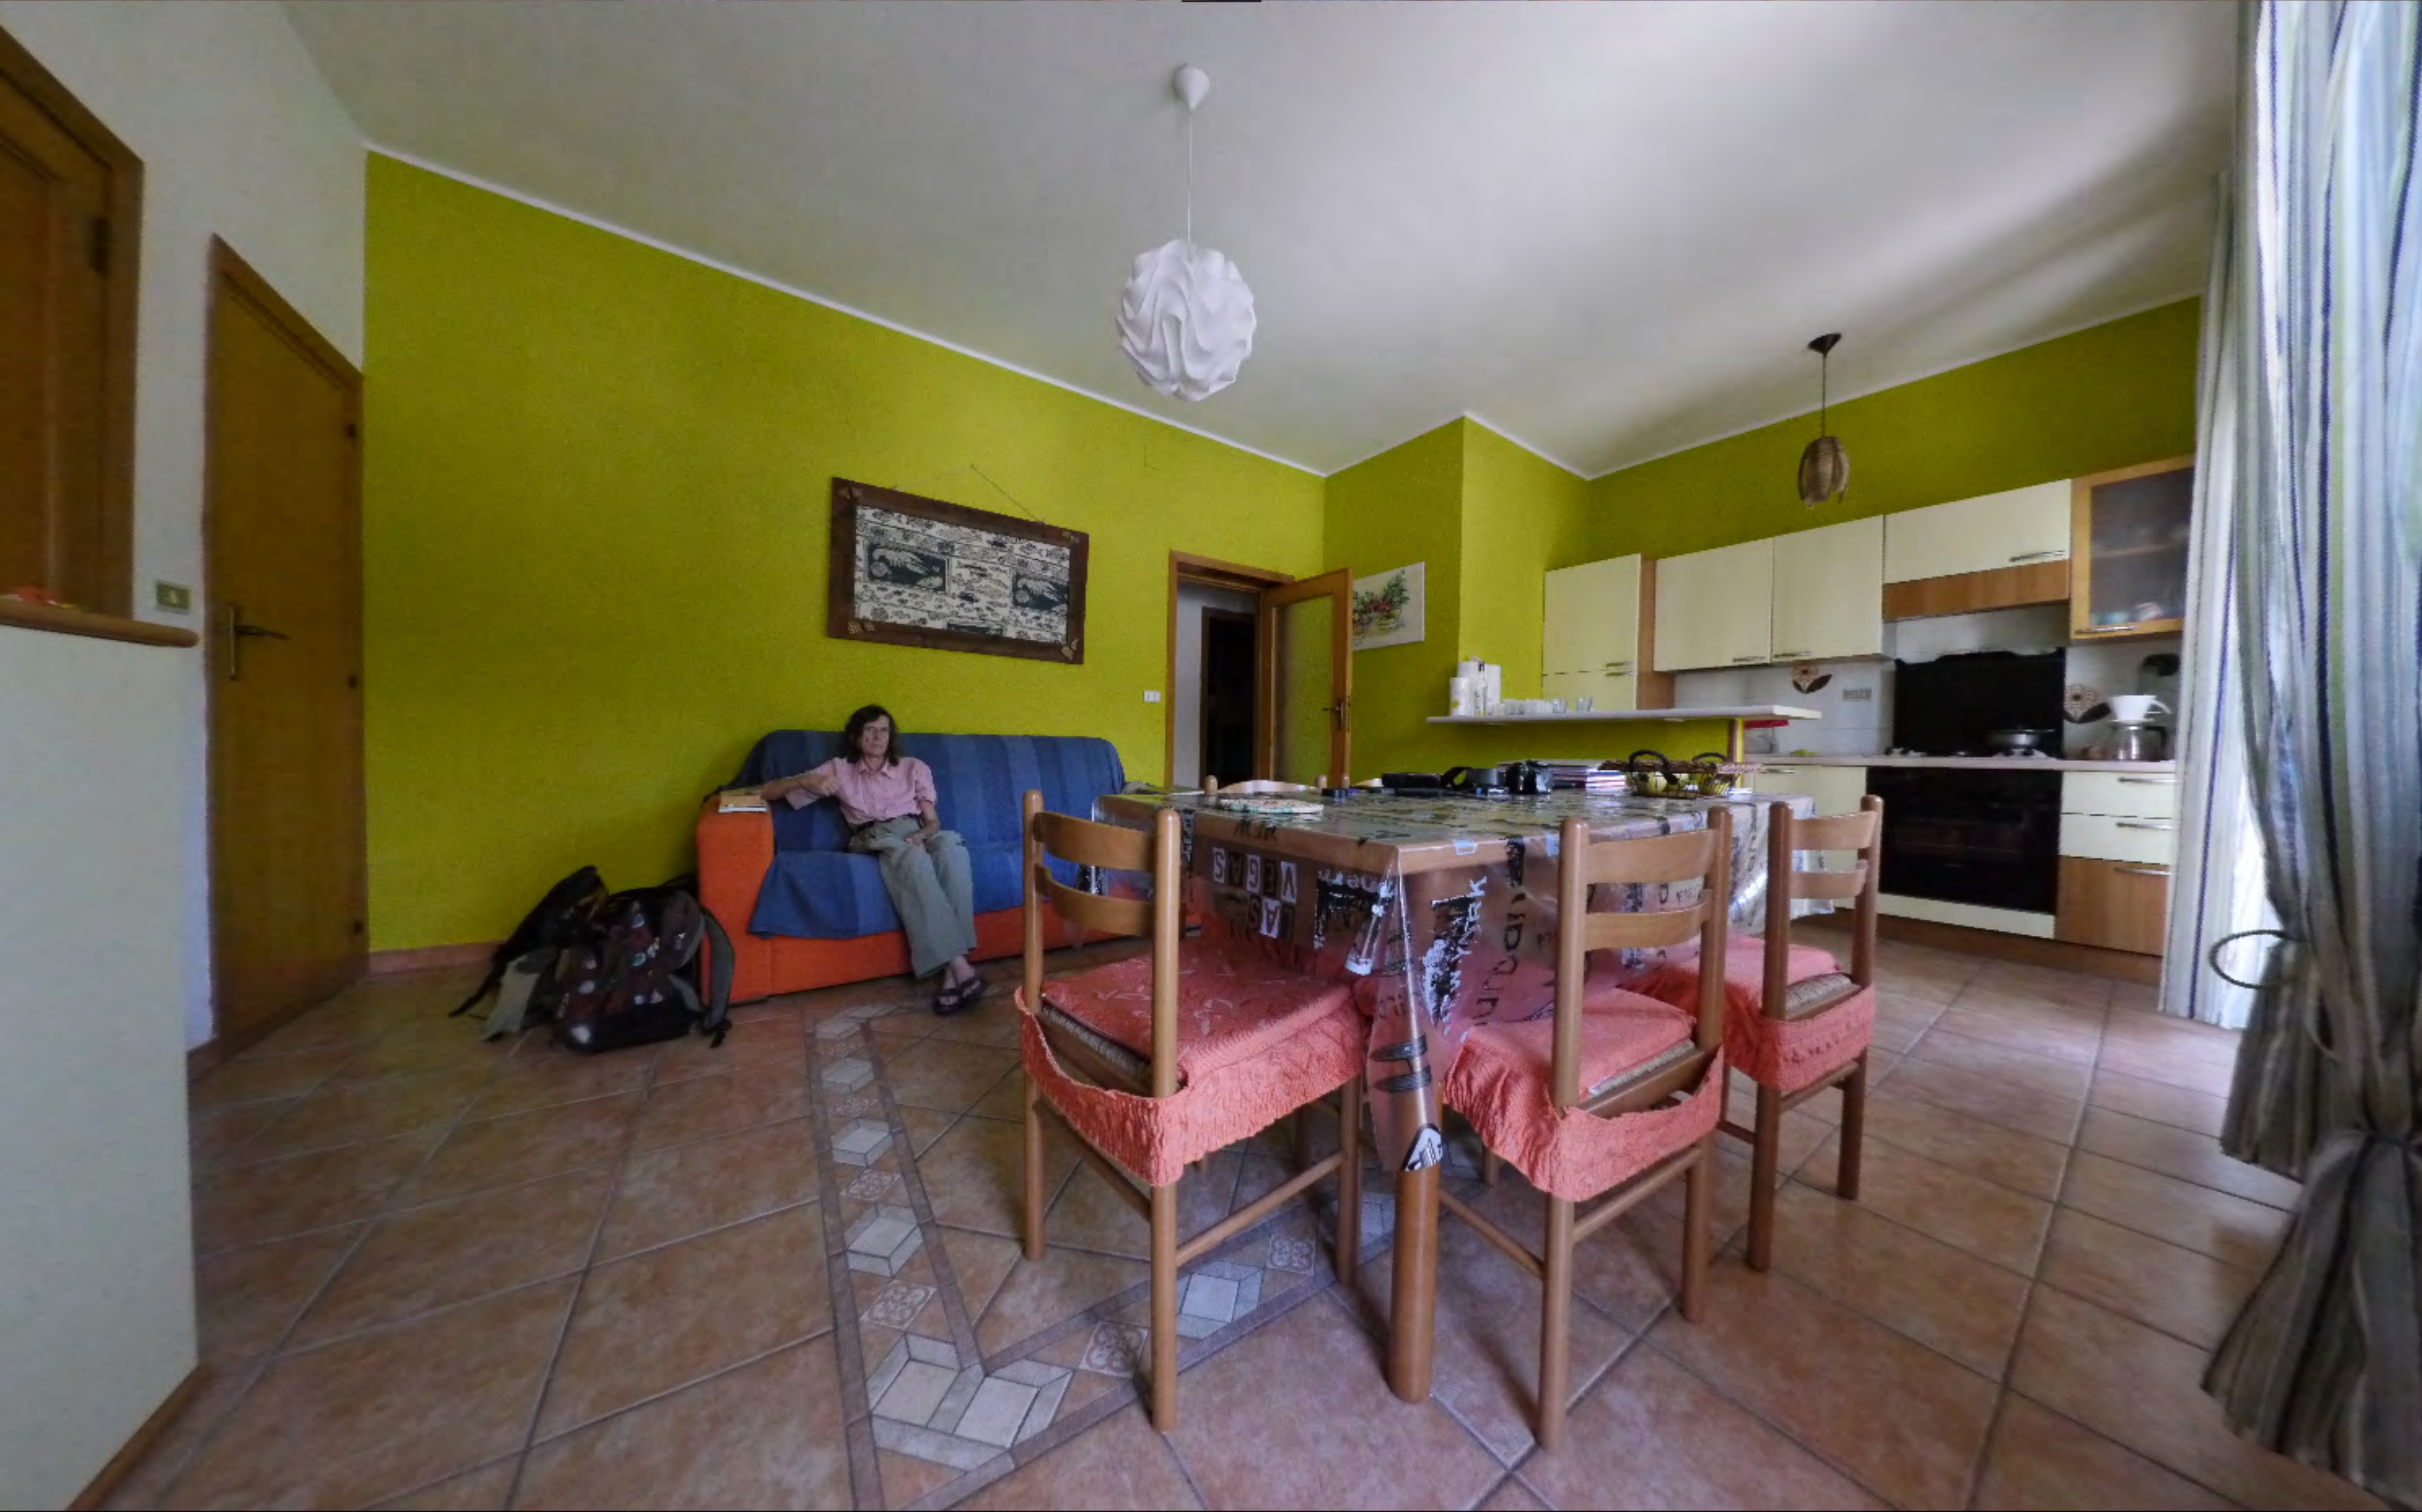

C

|   |   |
|---|---|
| A | B |
| C |   |



A

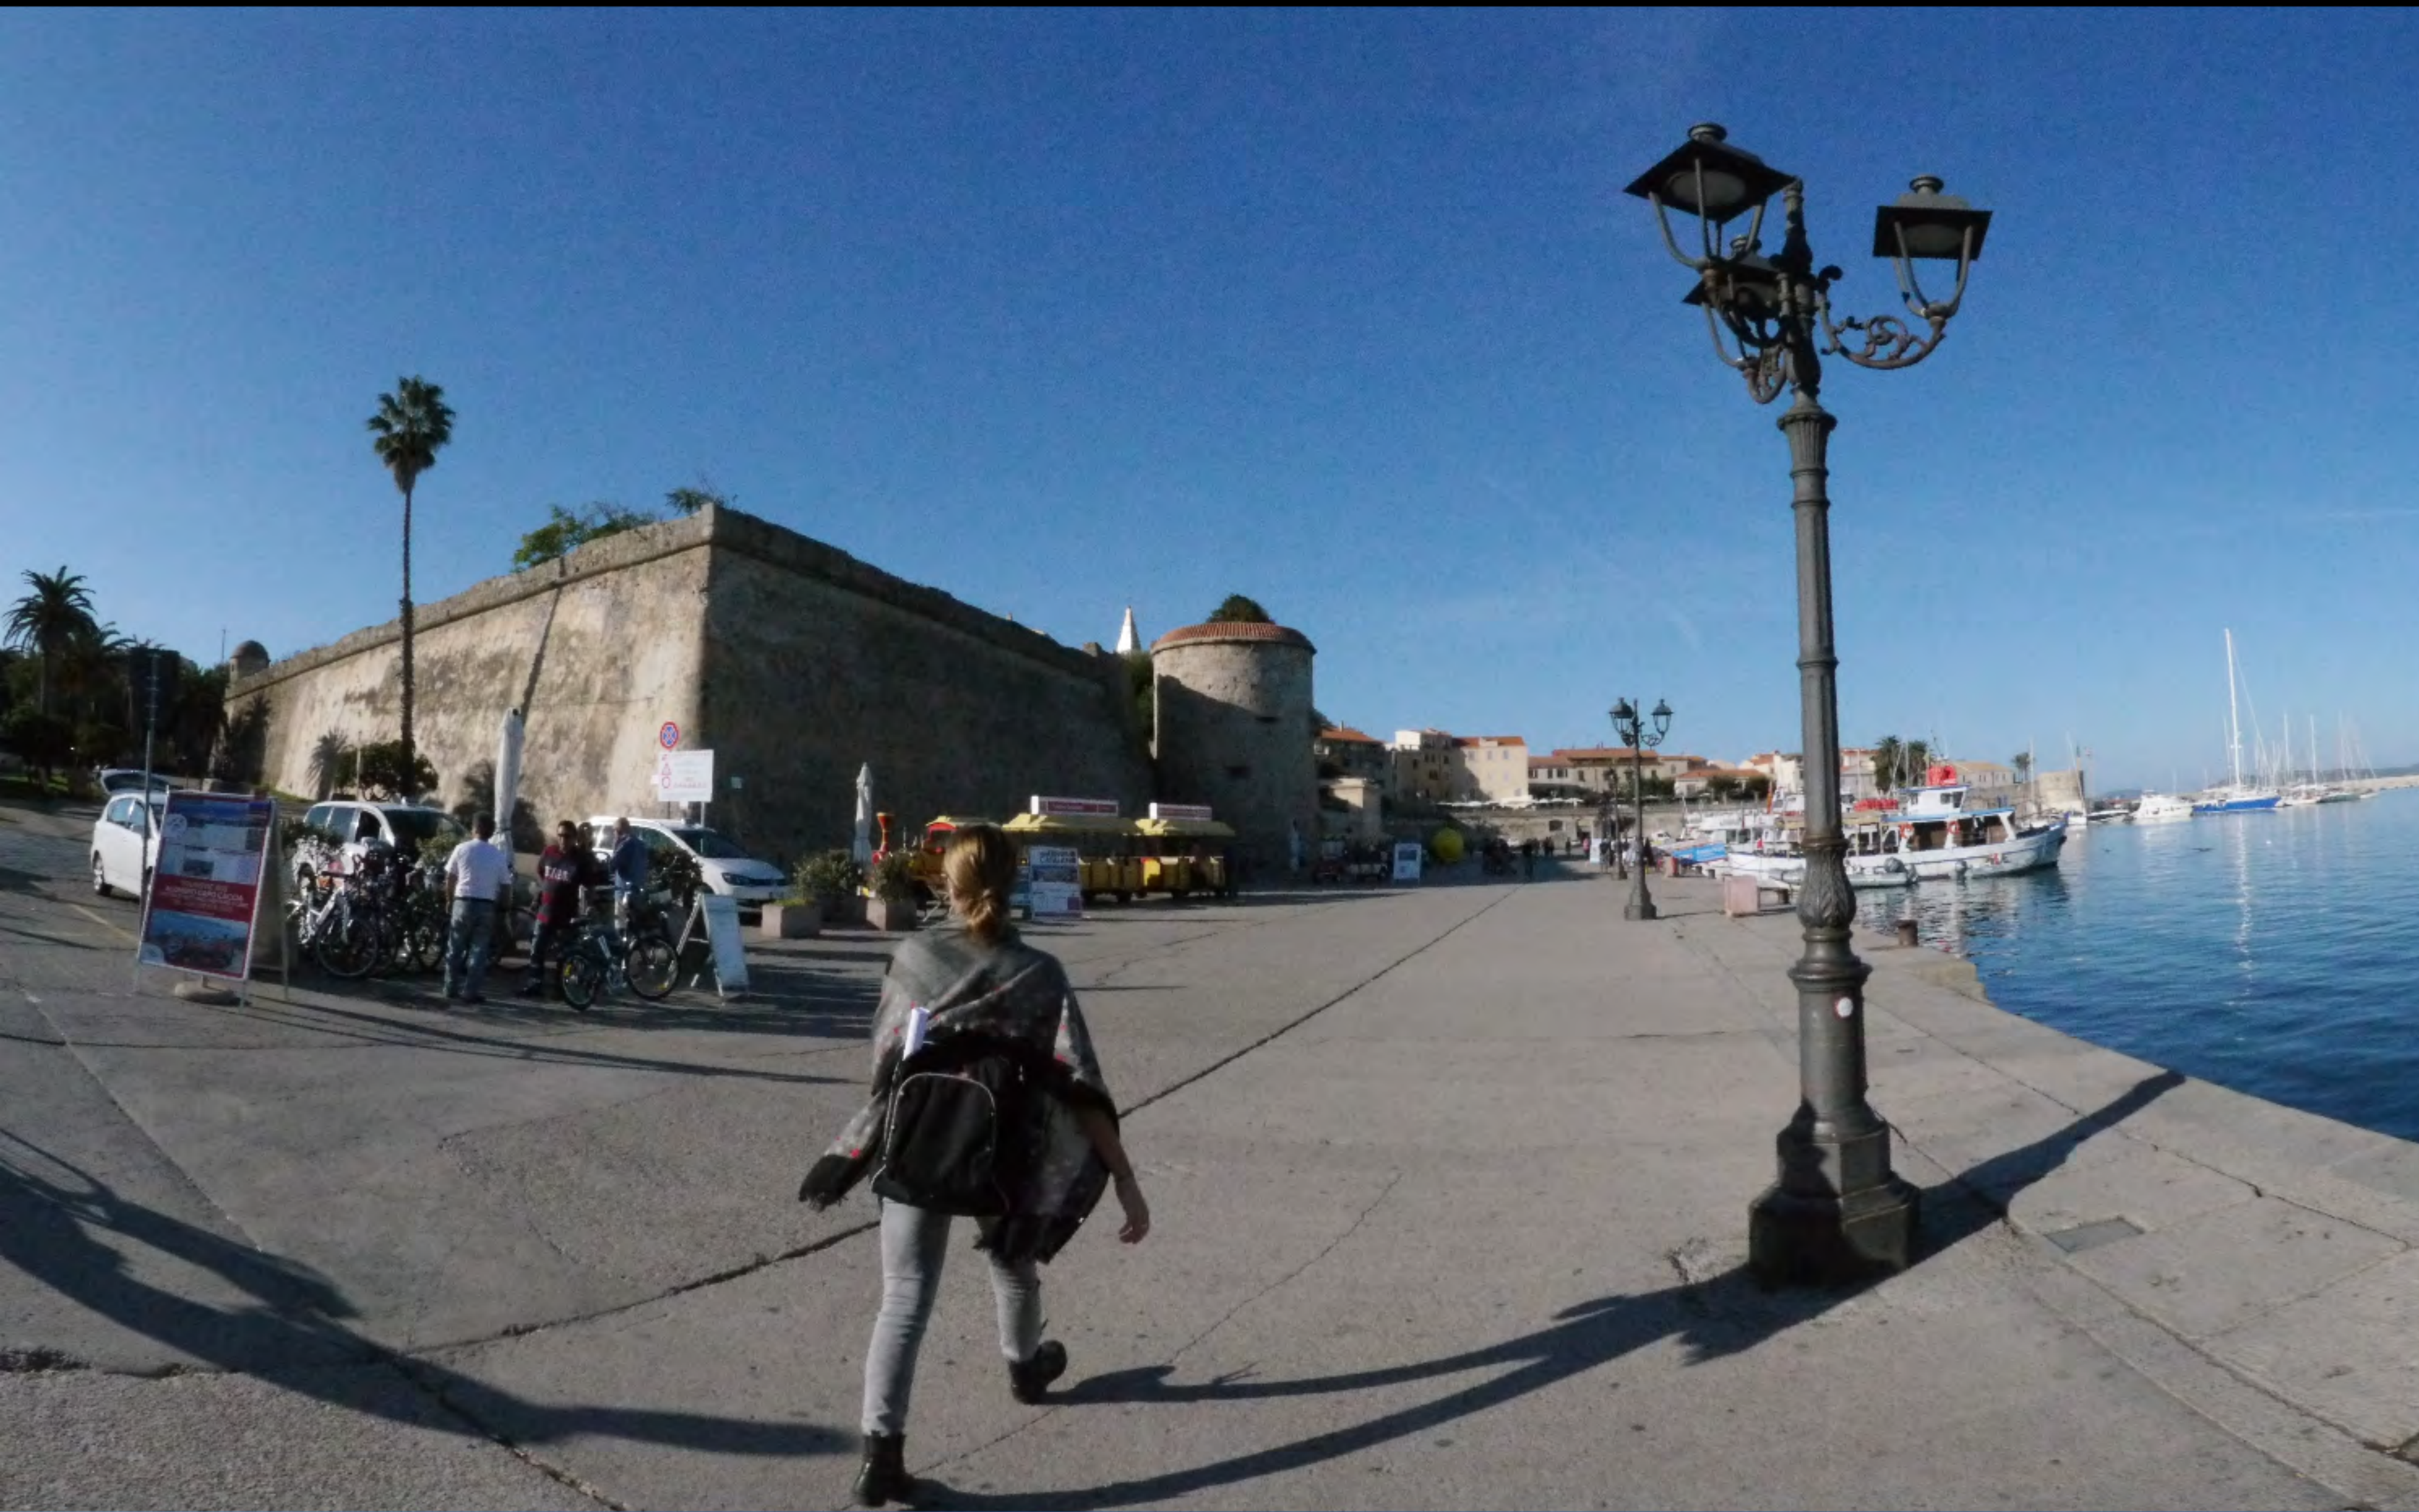

B

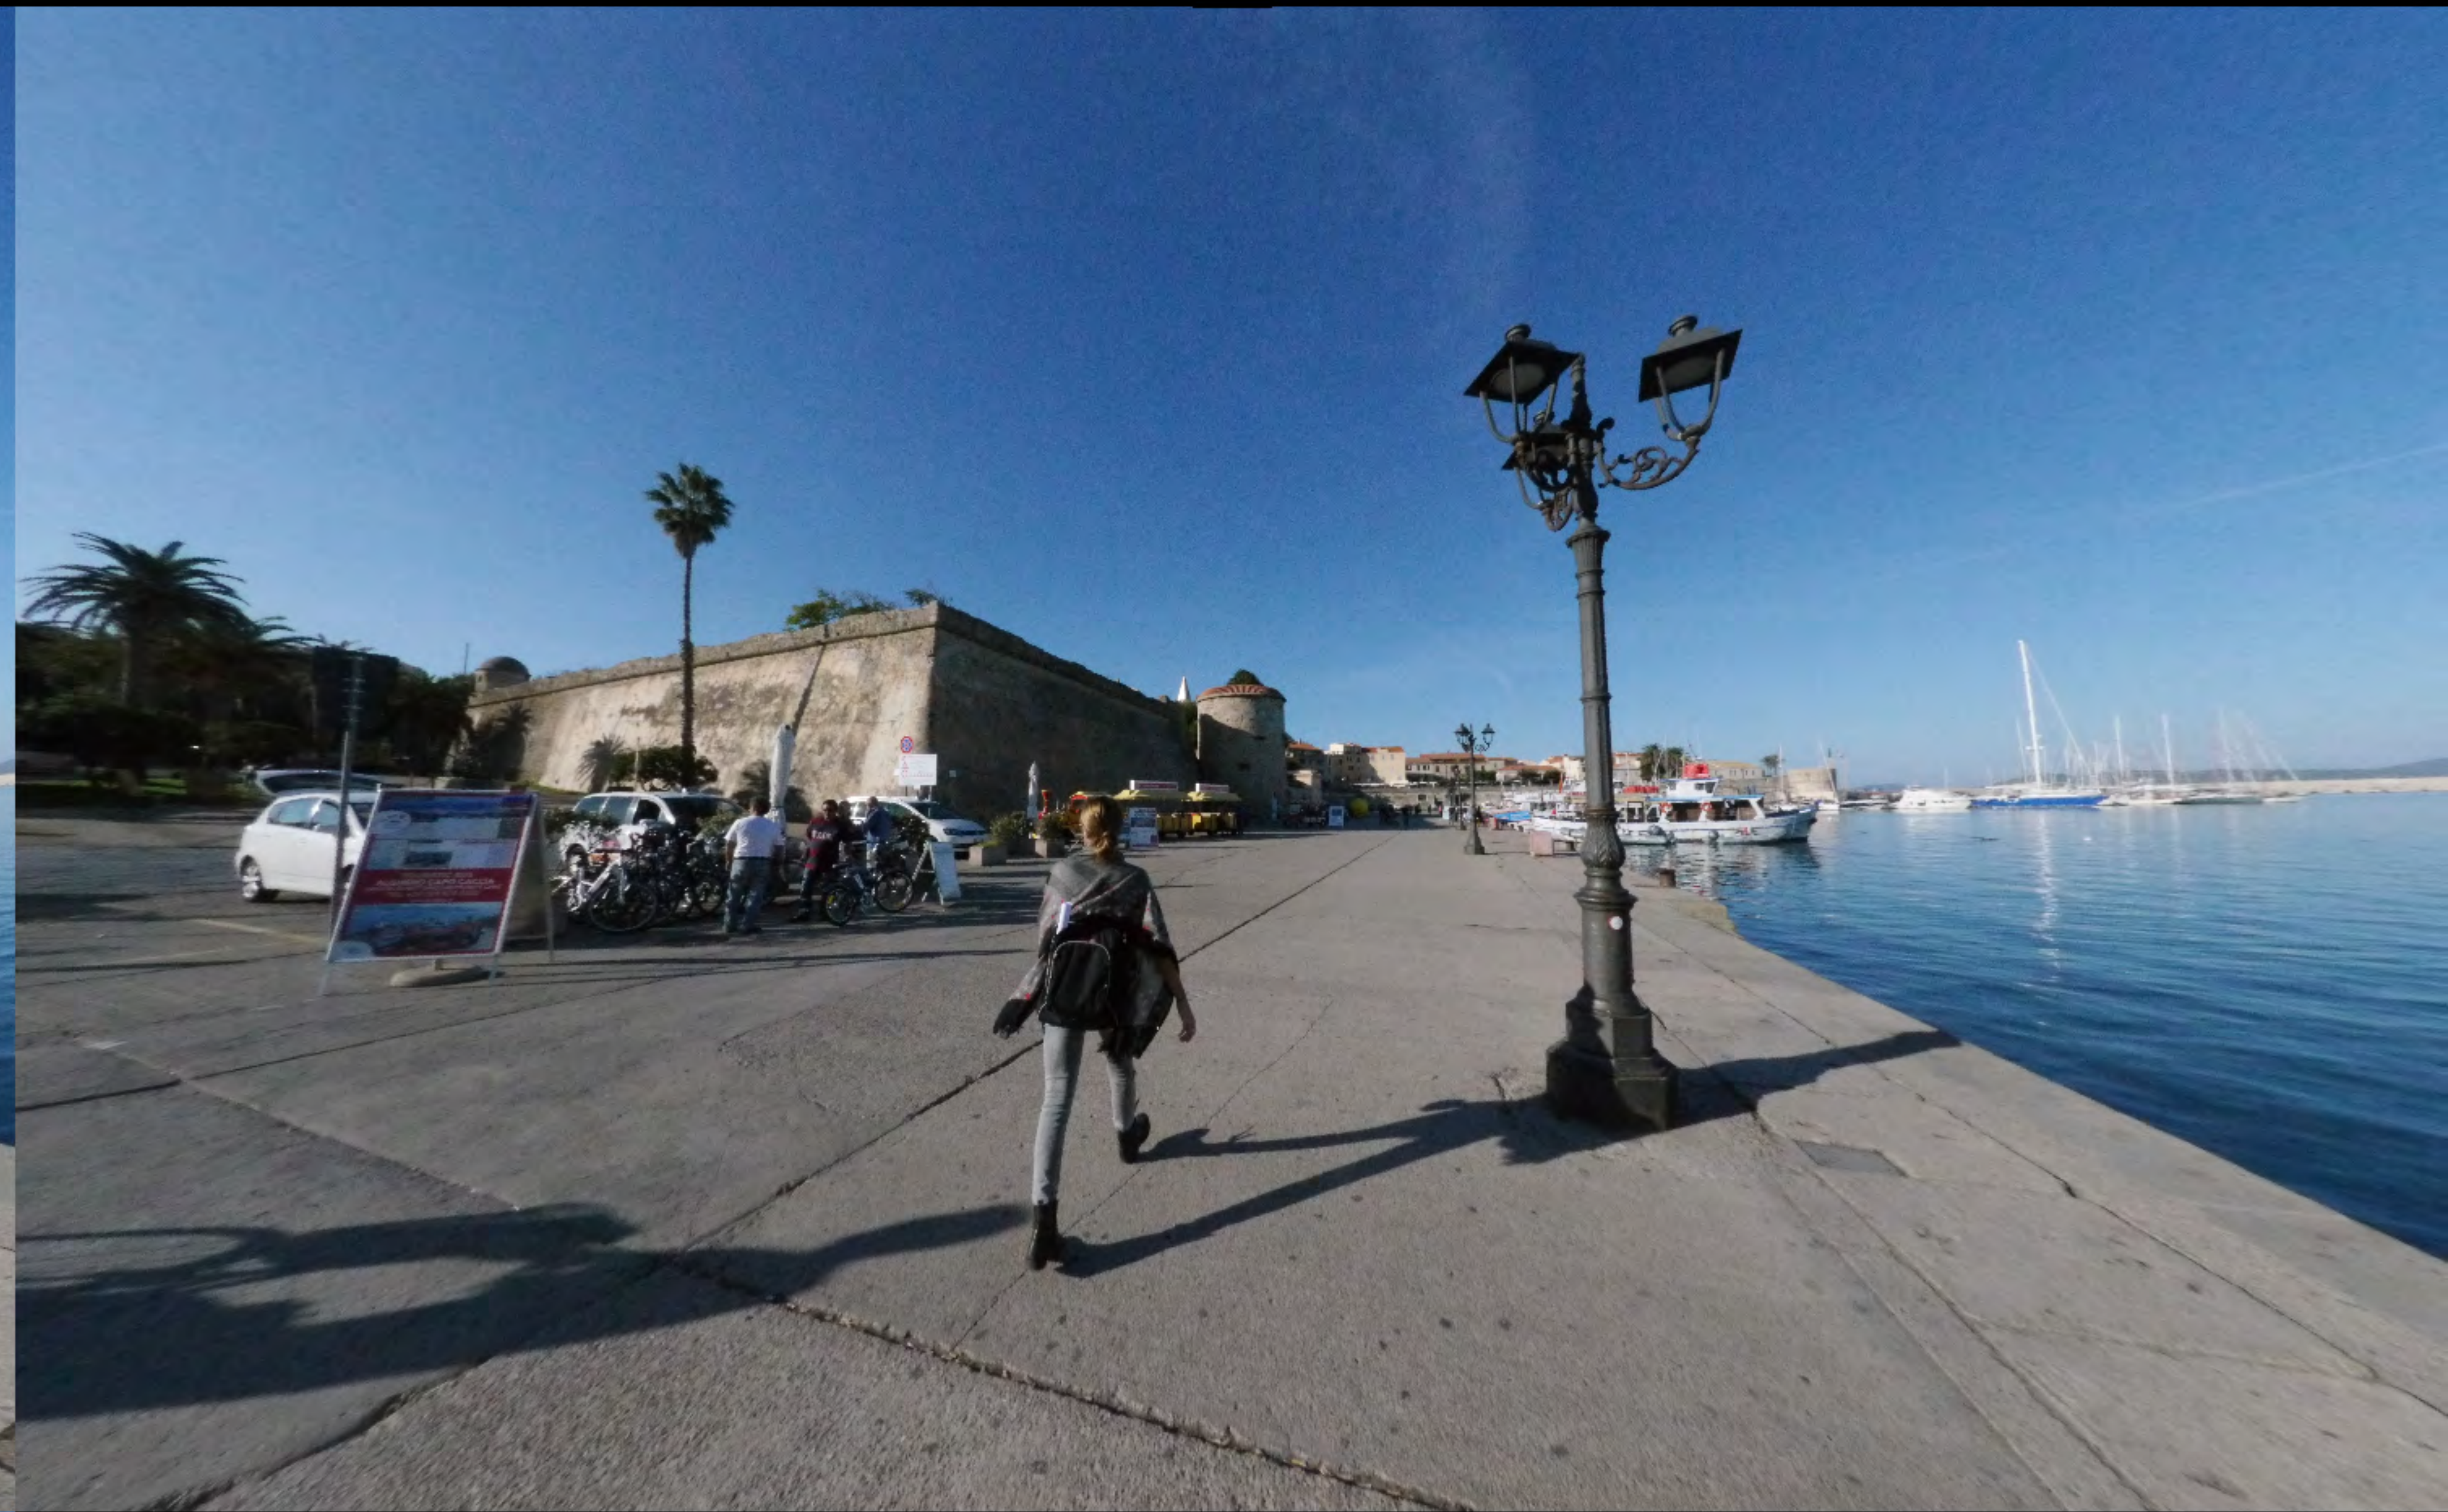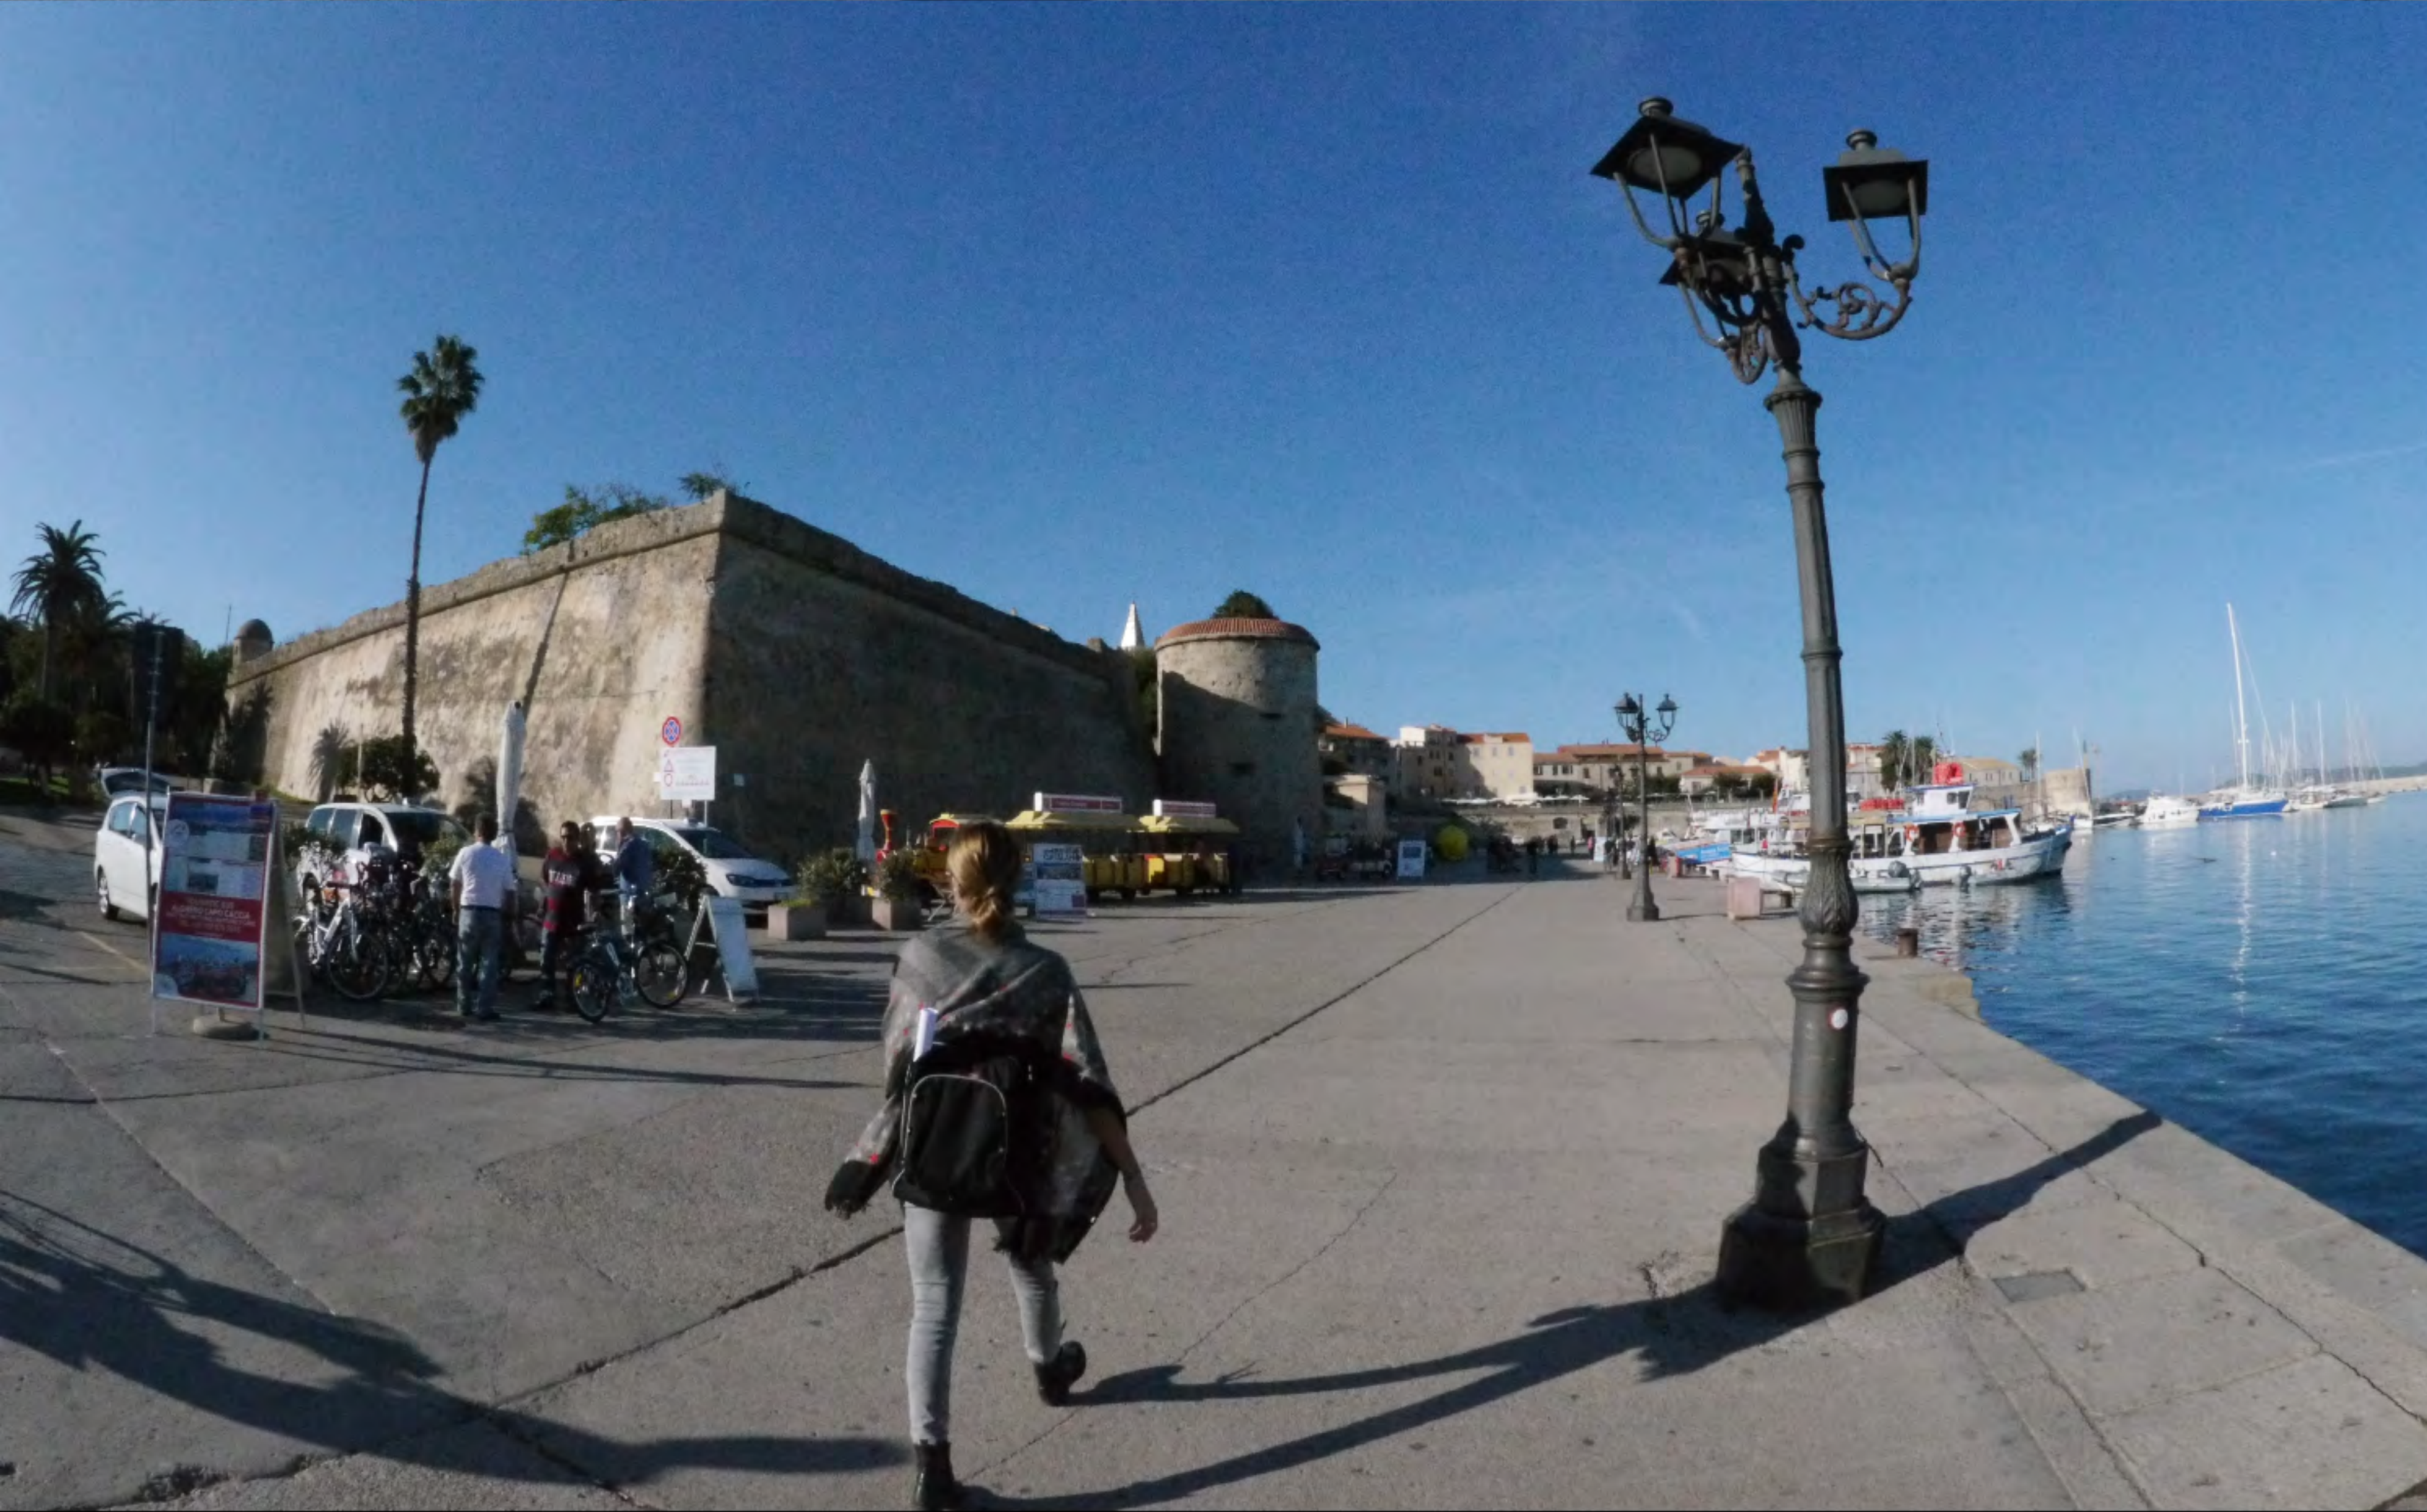

C

A

B

C



A

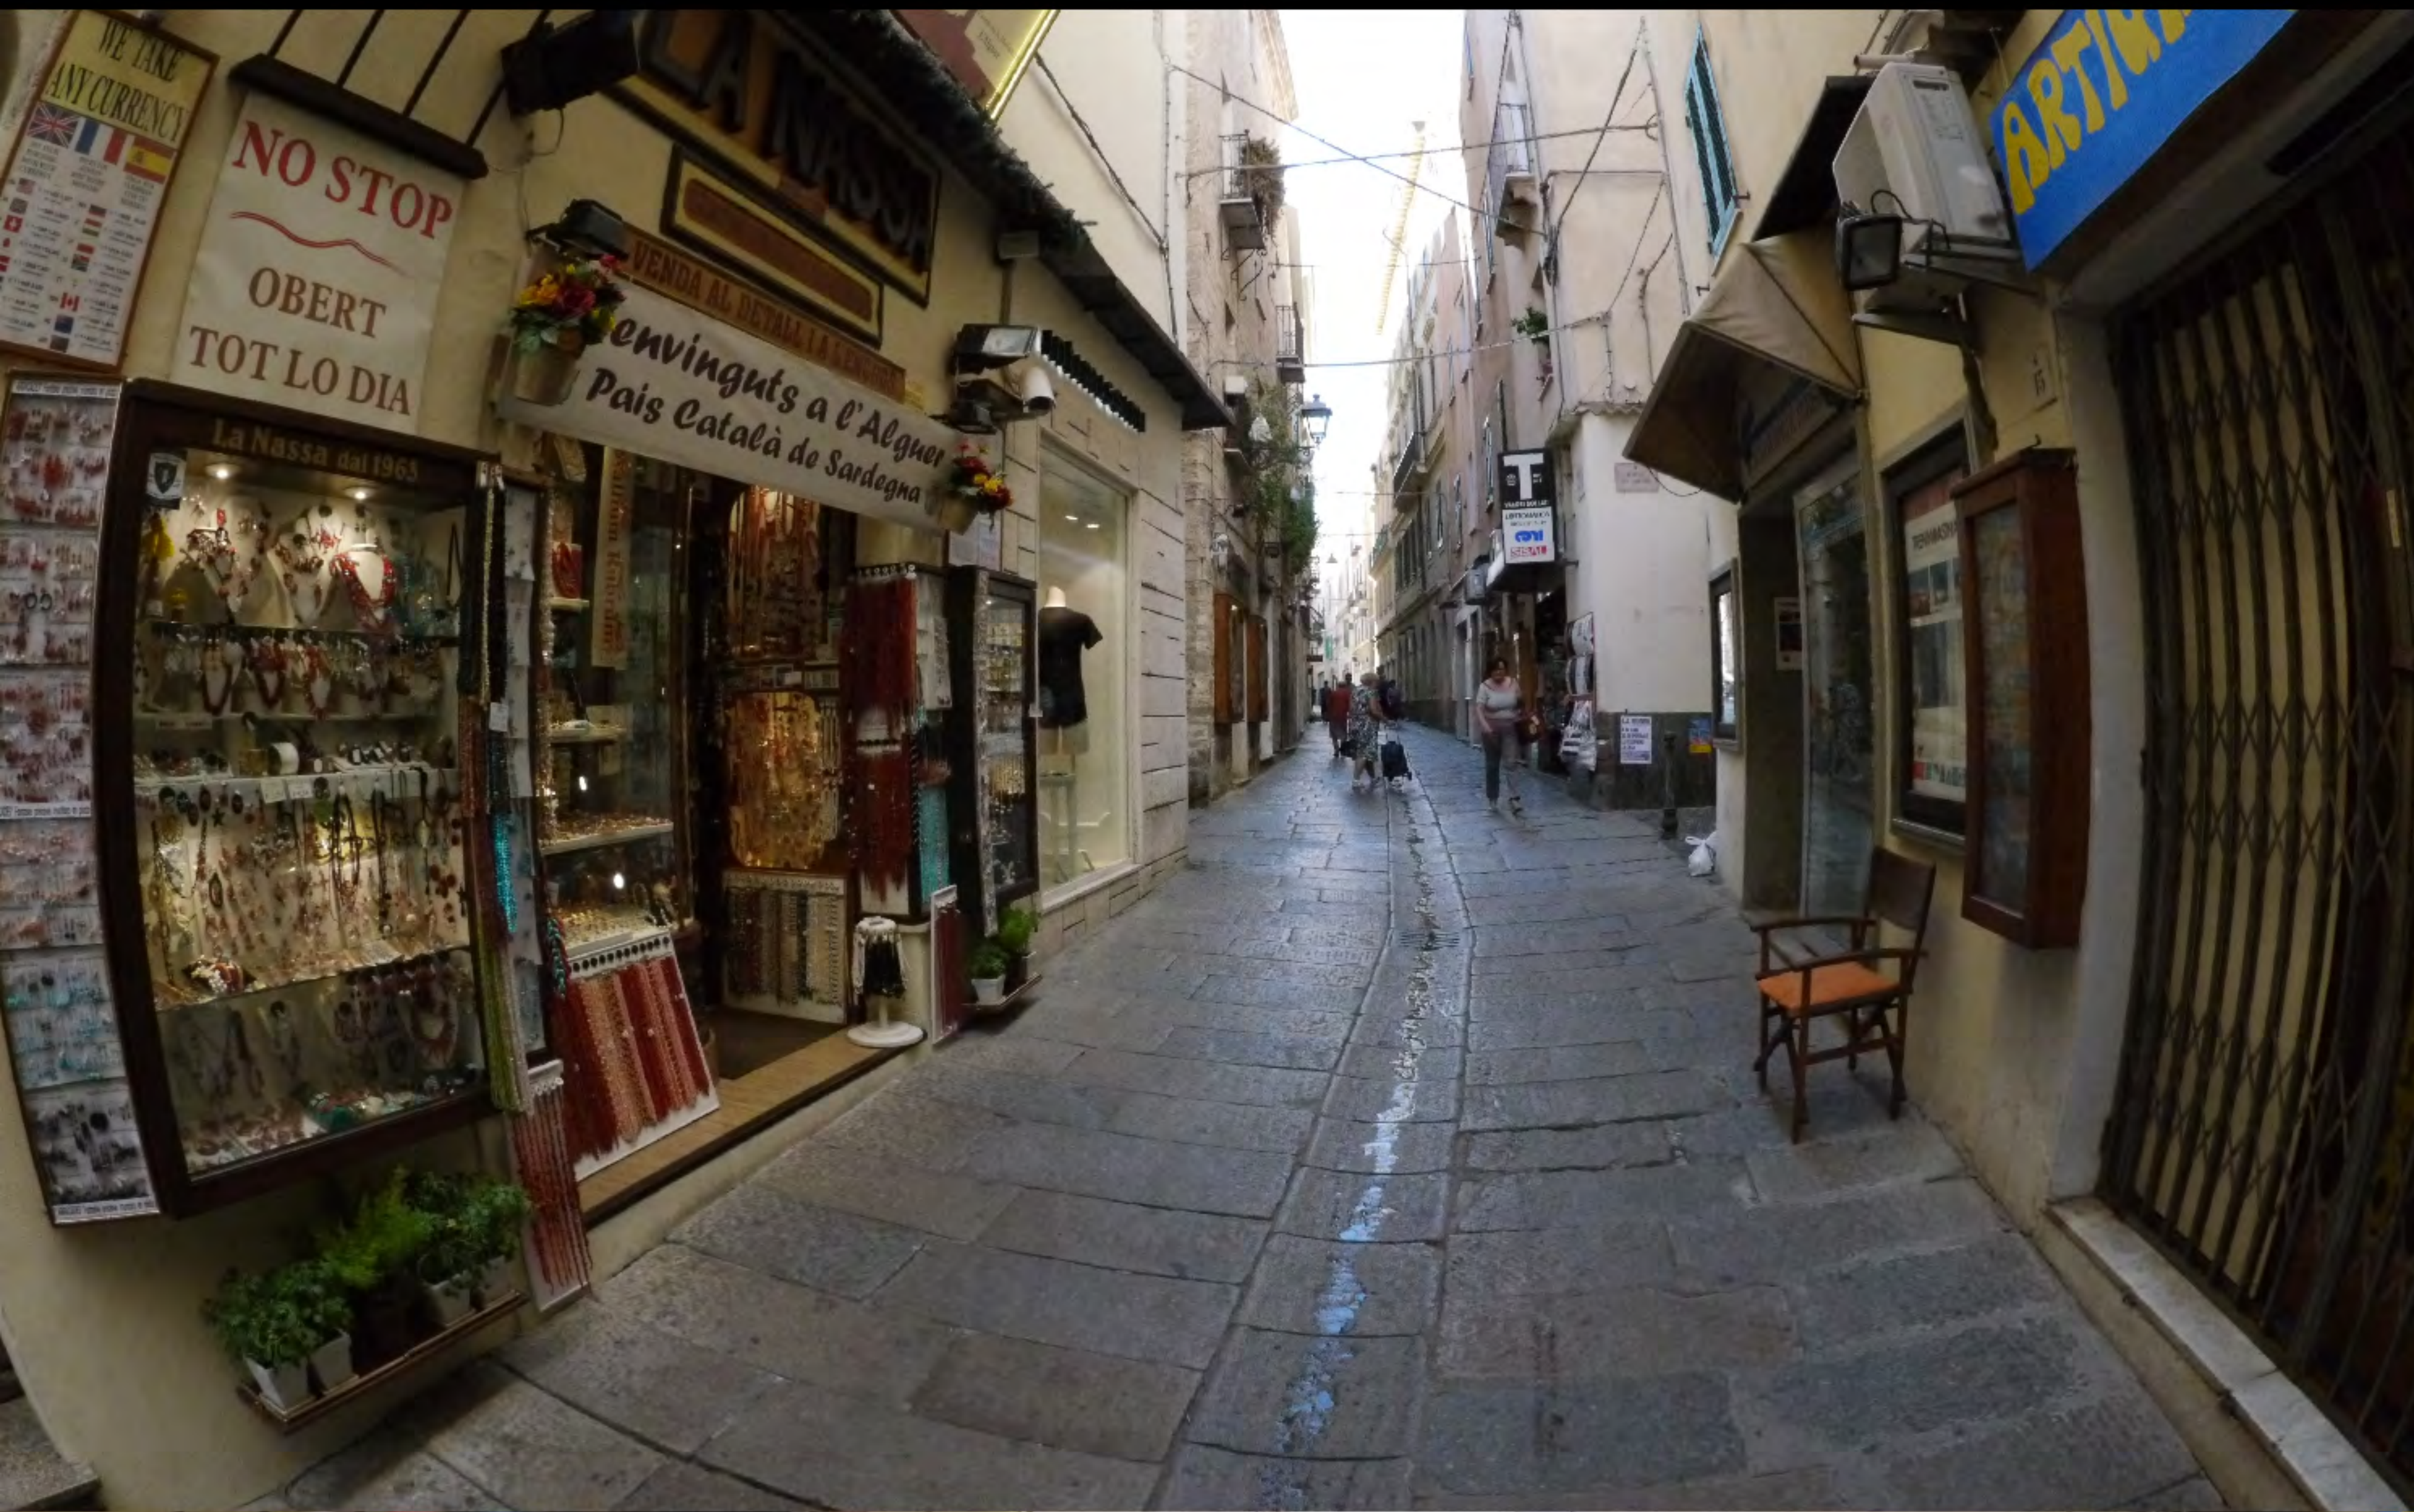

B

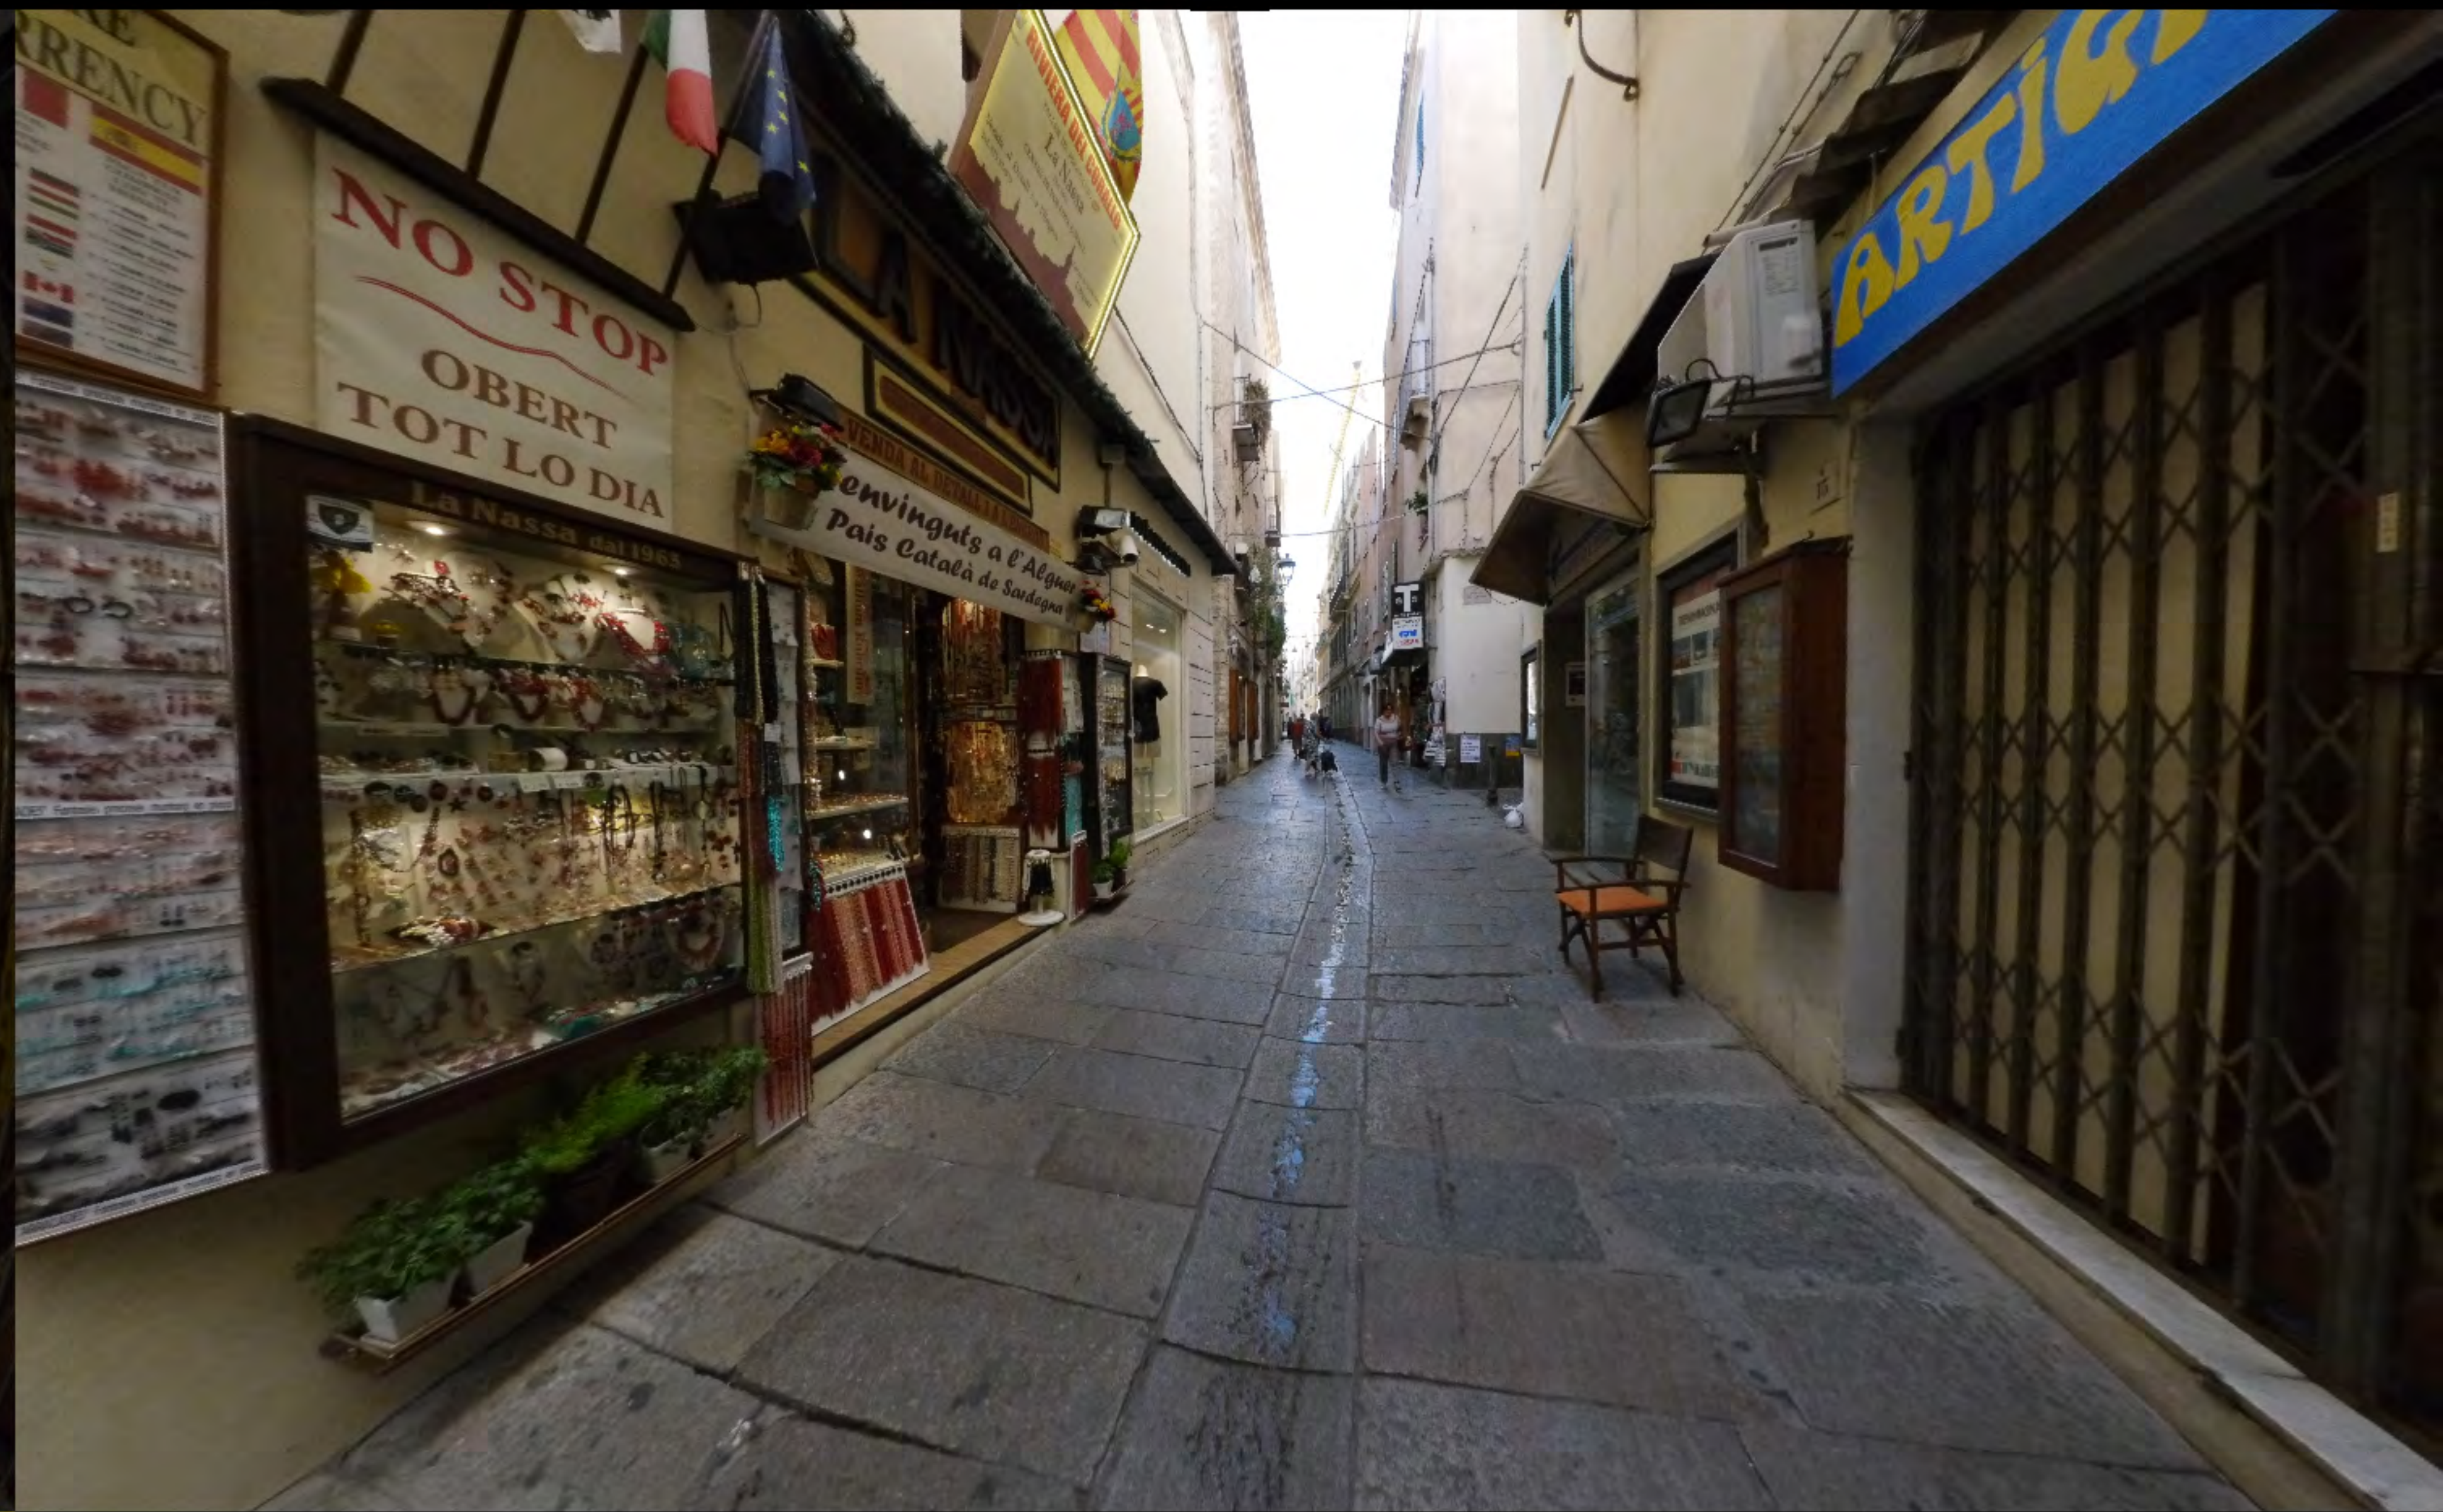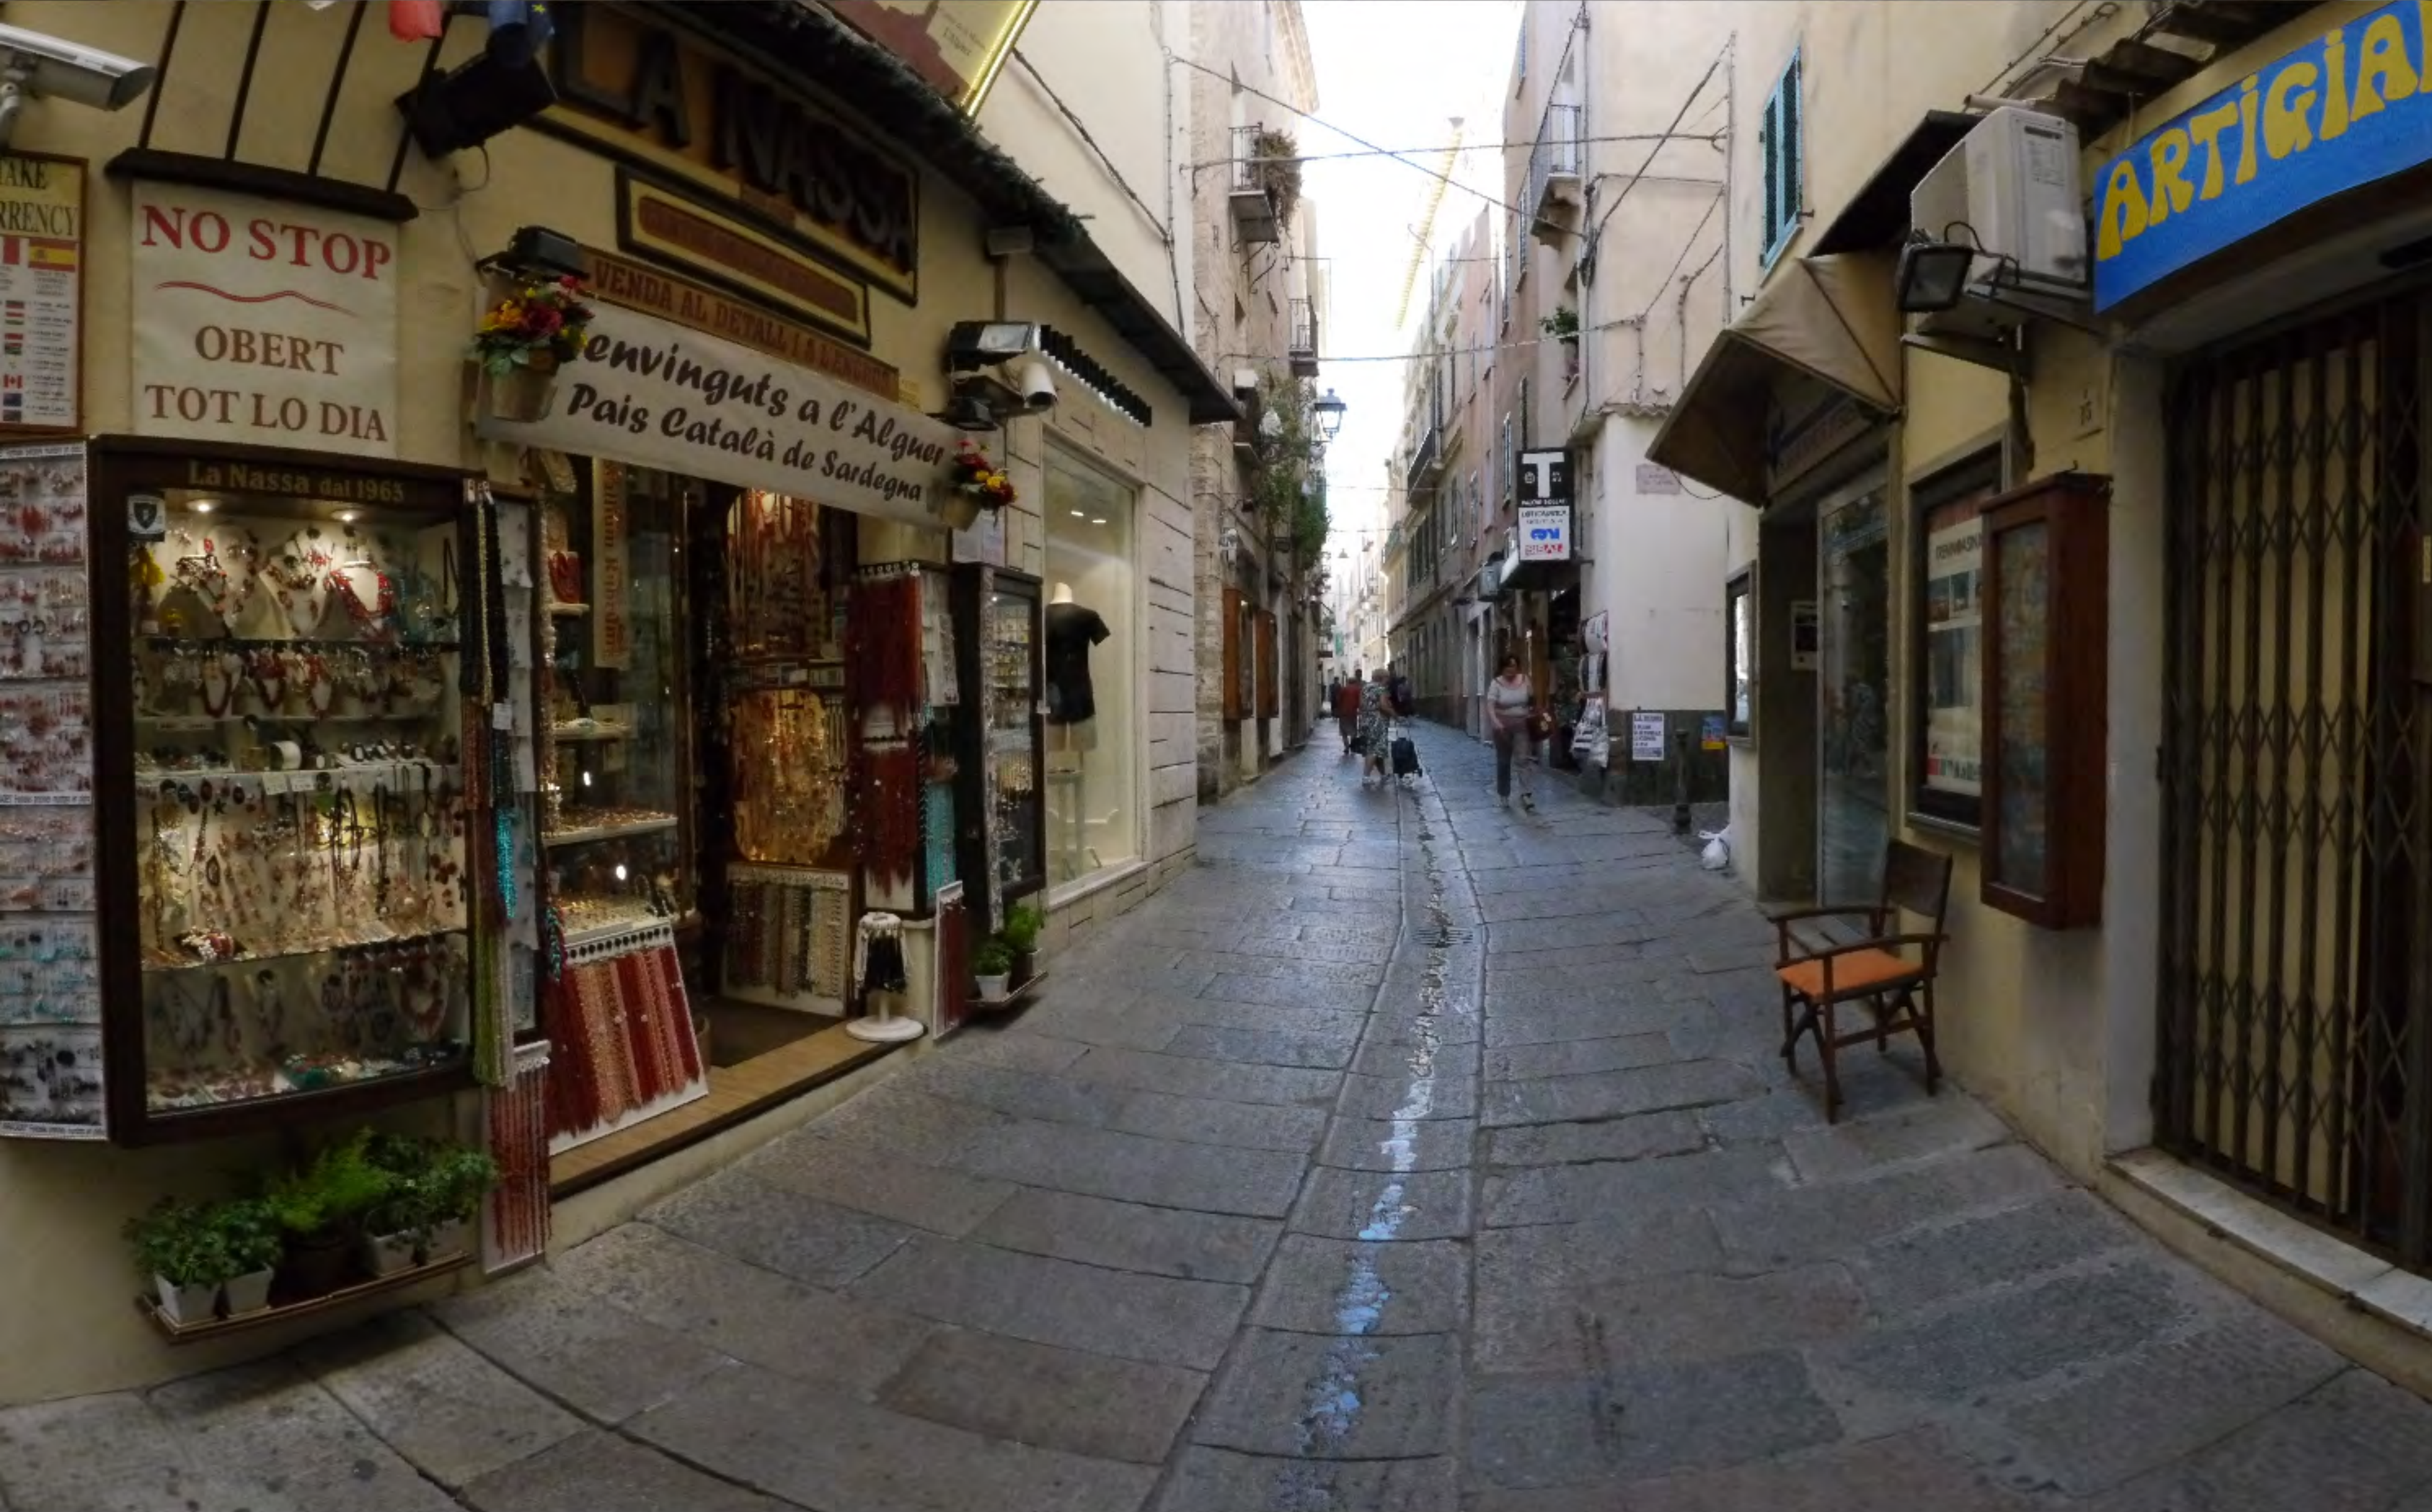

C

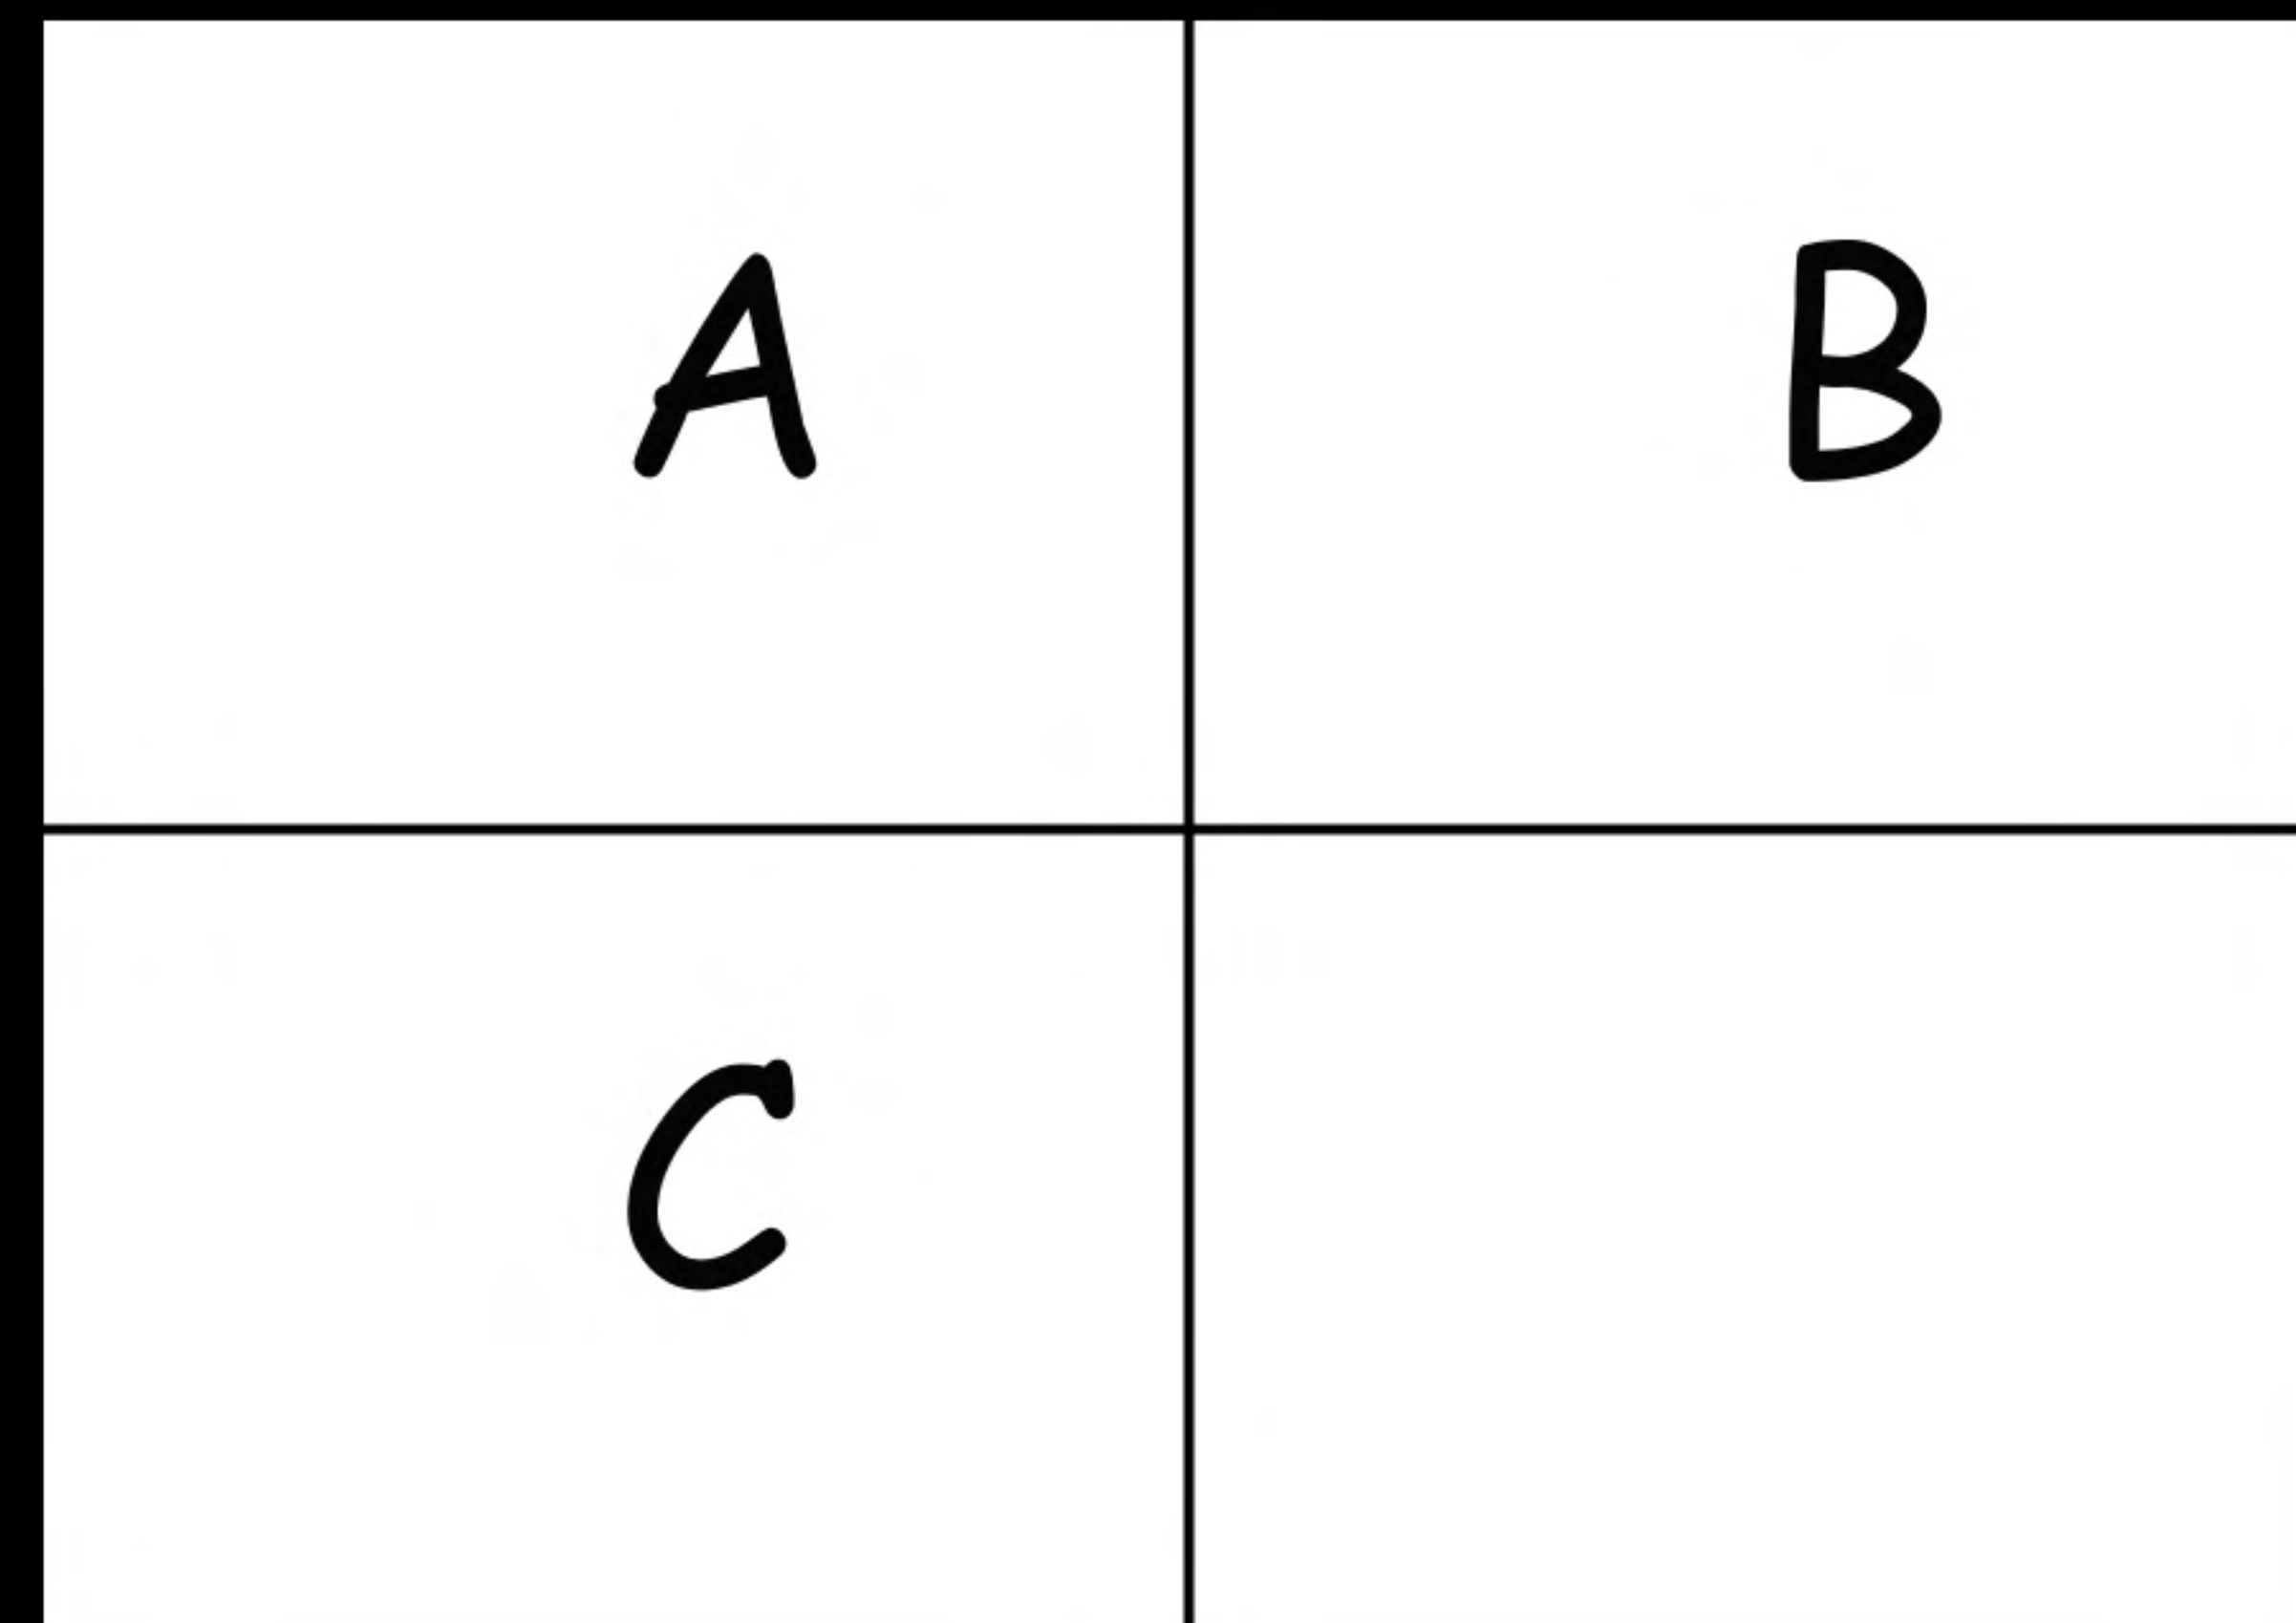



# Booklet #1
