# Supplementary material
Source: publisher figshare collection journal article supplement (https://brill.figshare.com/articles/dataset/_/1564714)

# The 10 images (original fish-eye captures)

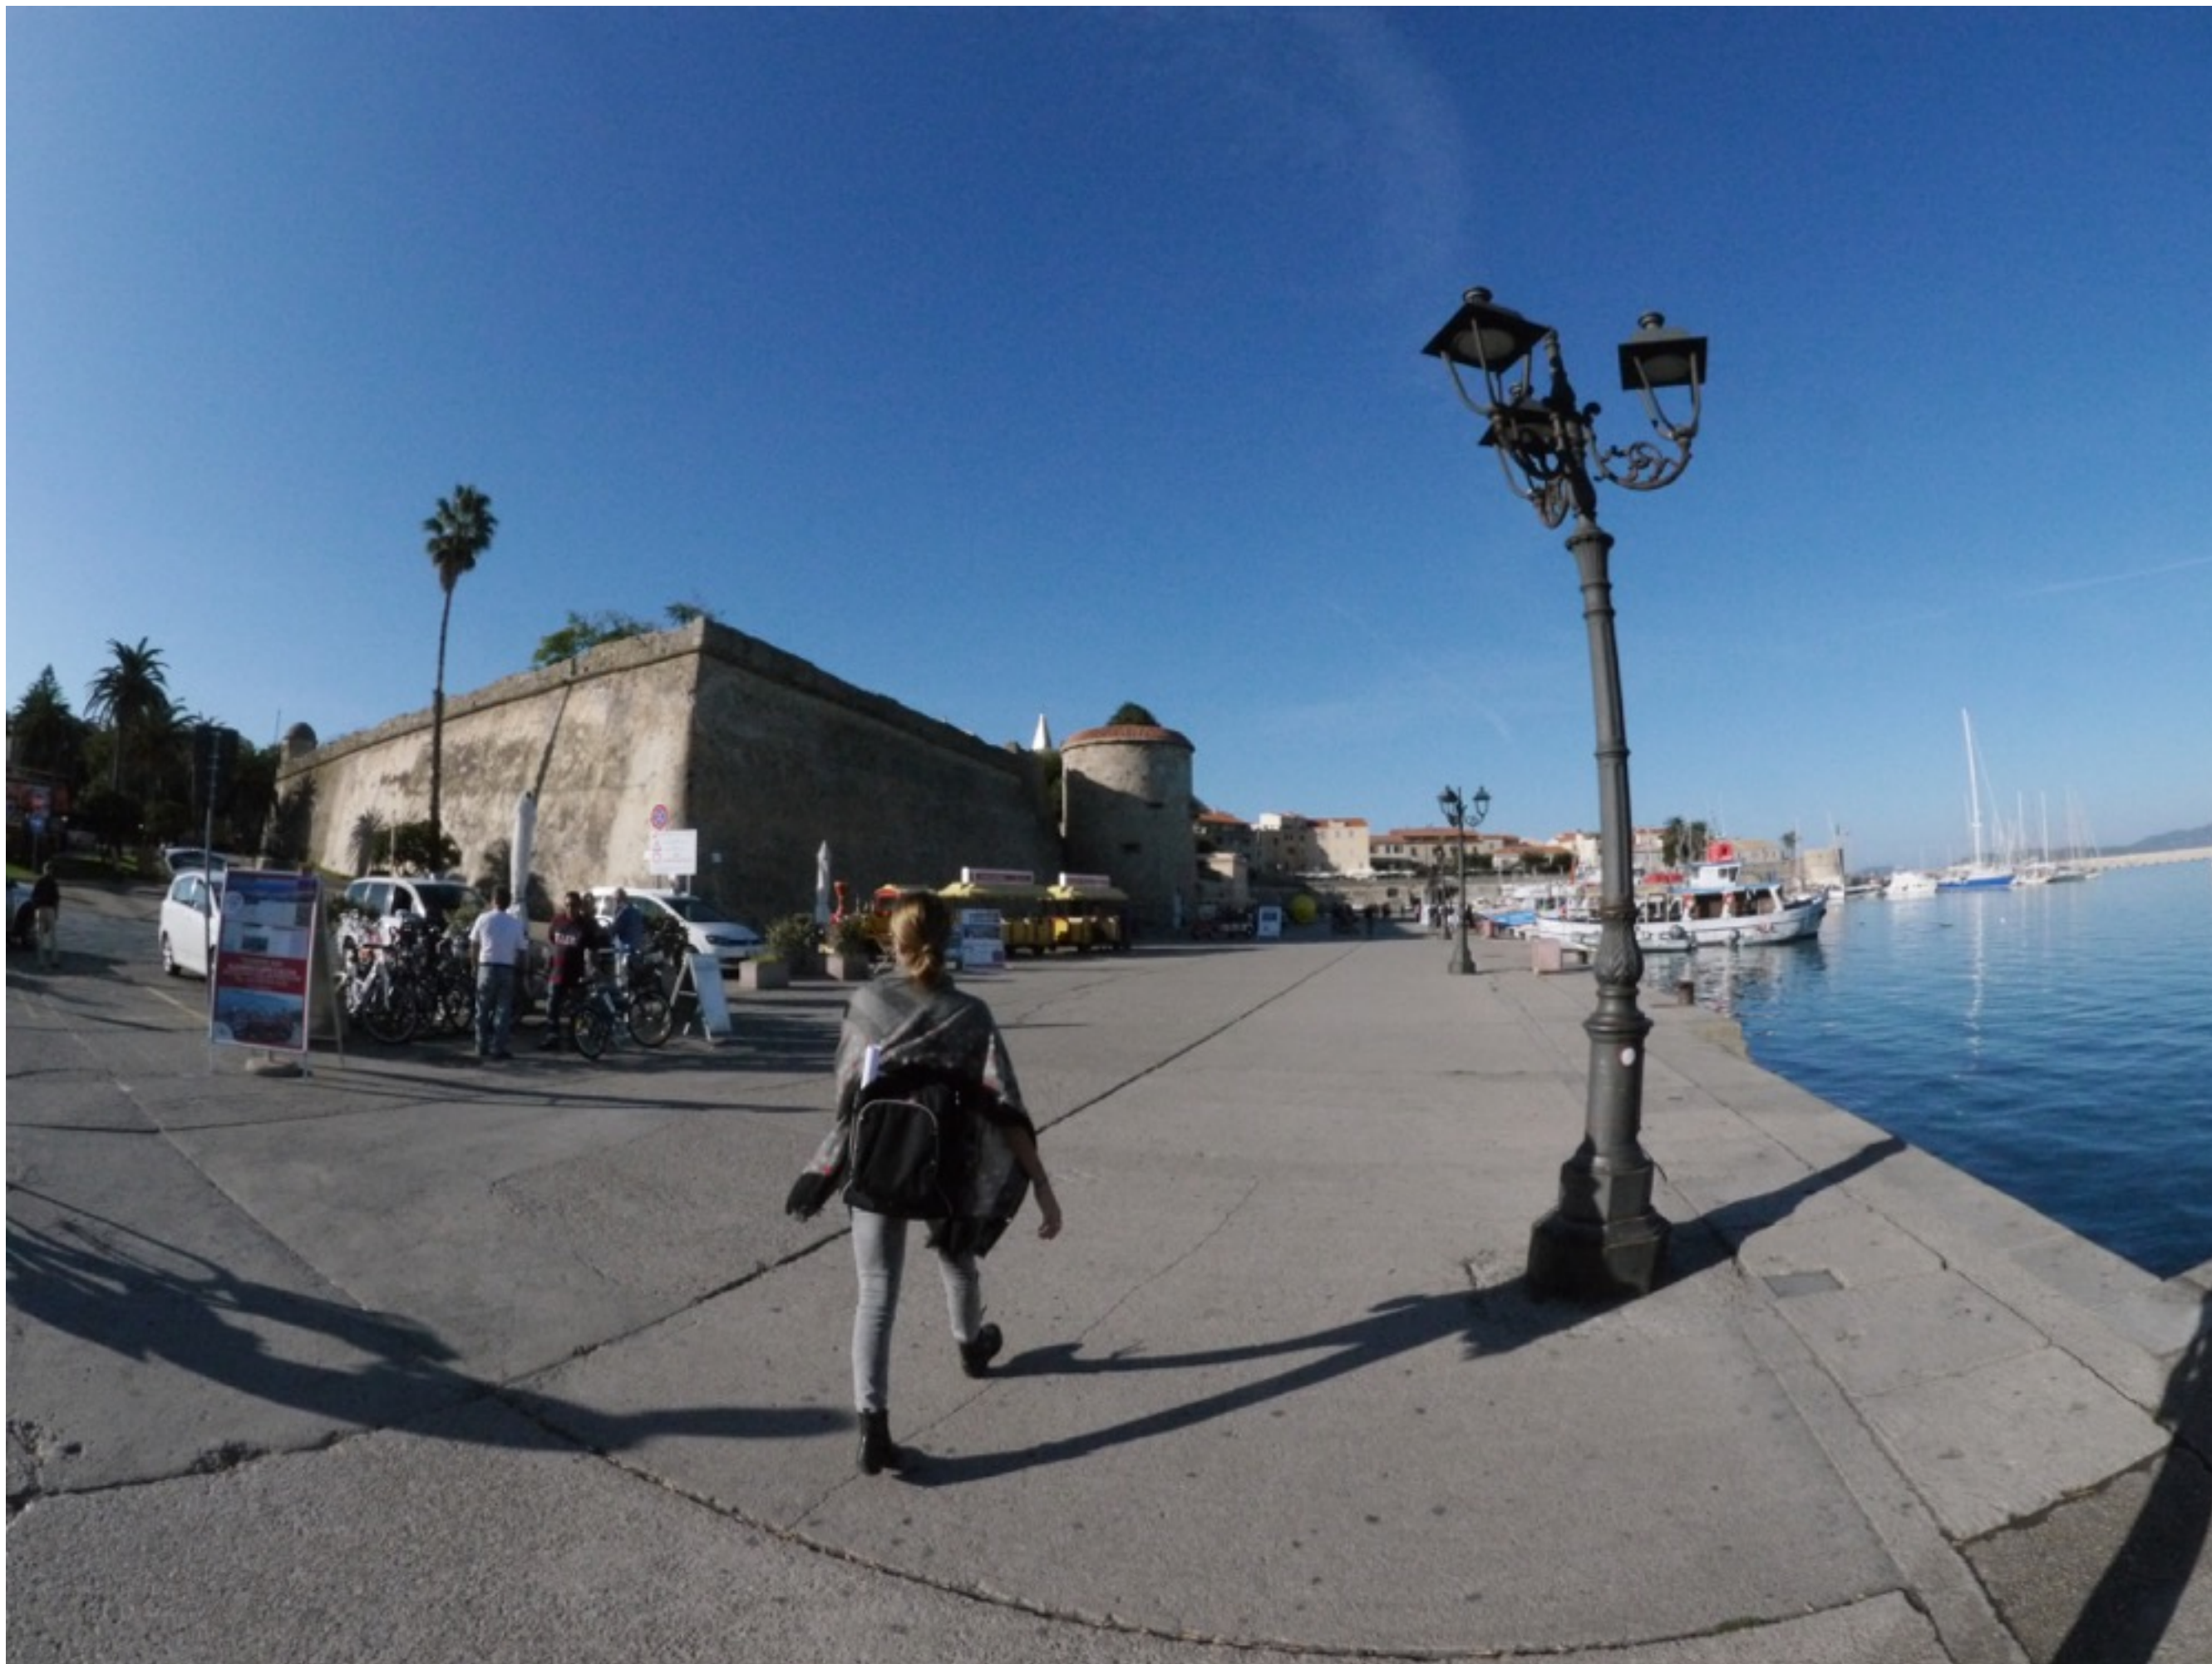

1

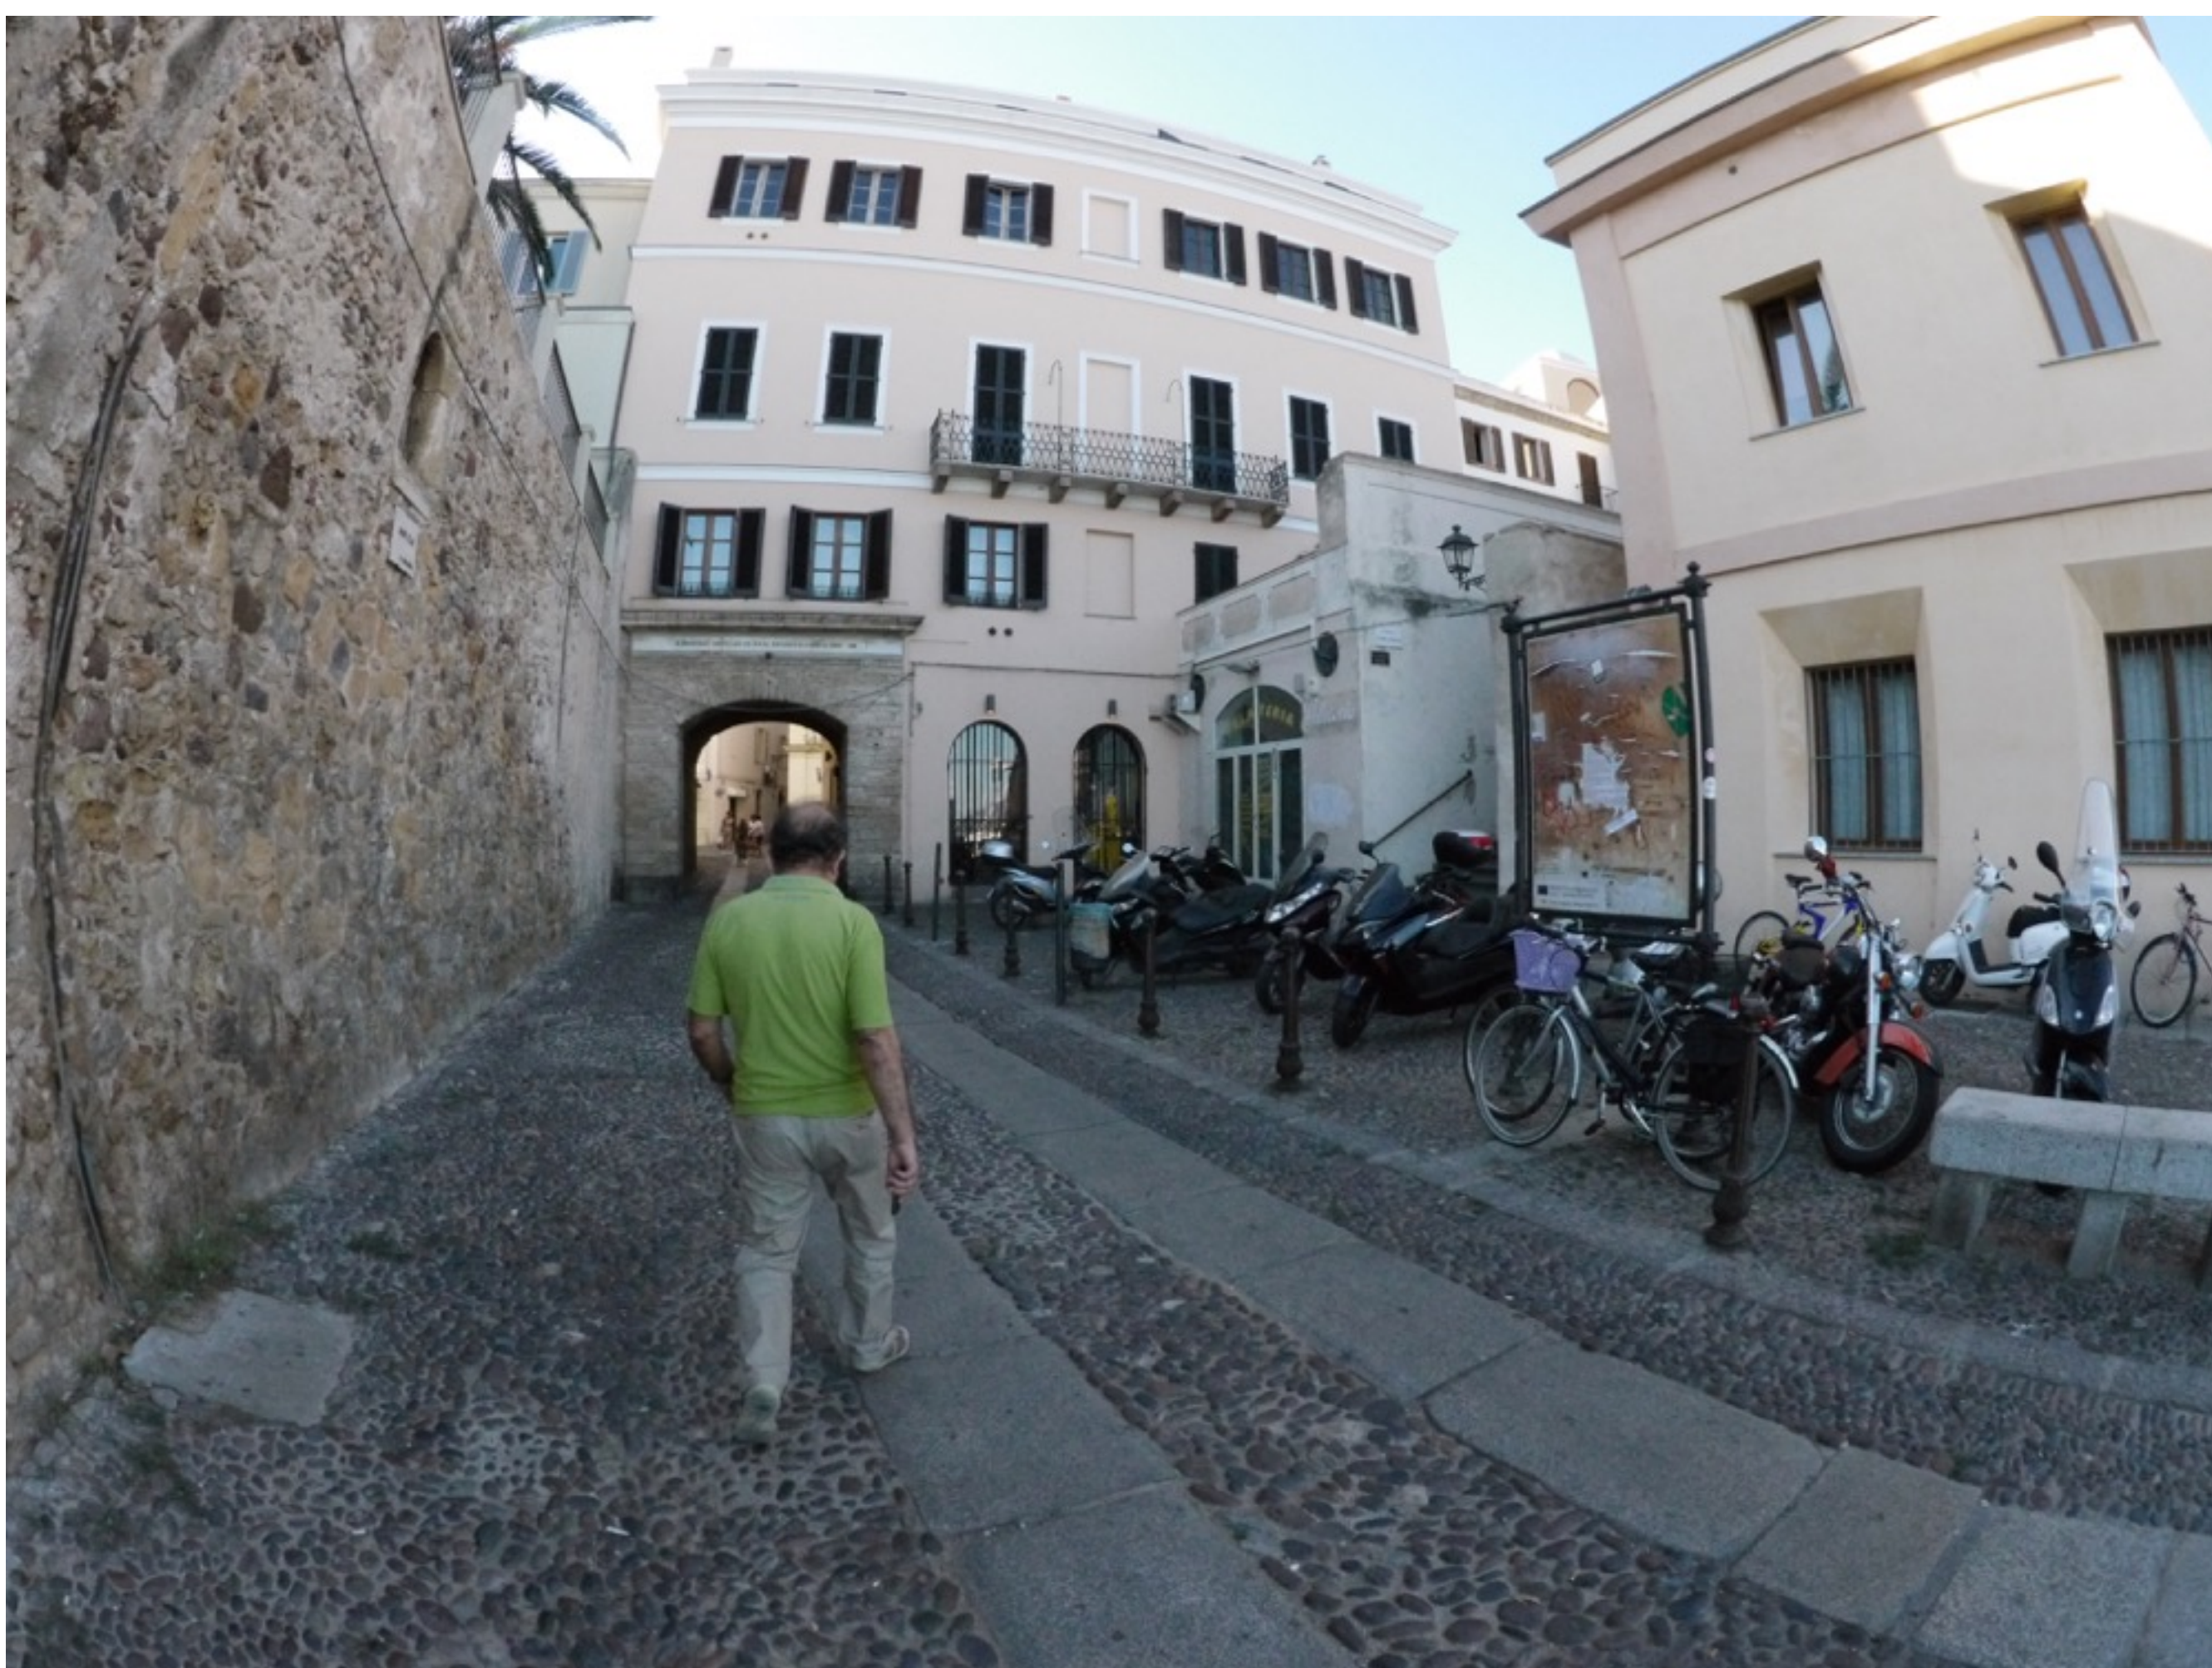

2



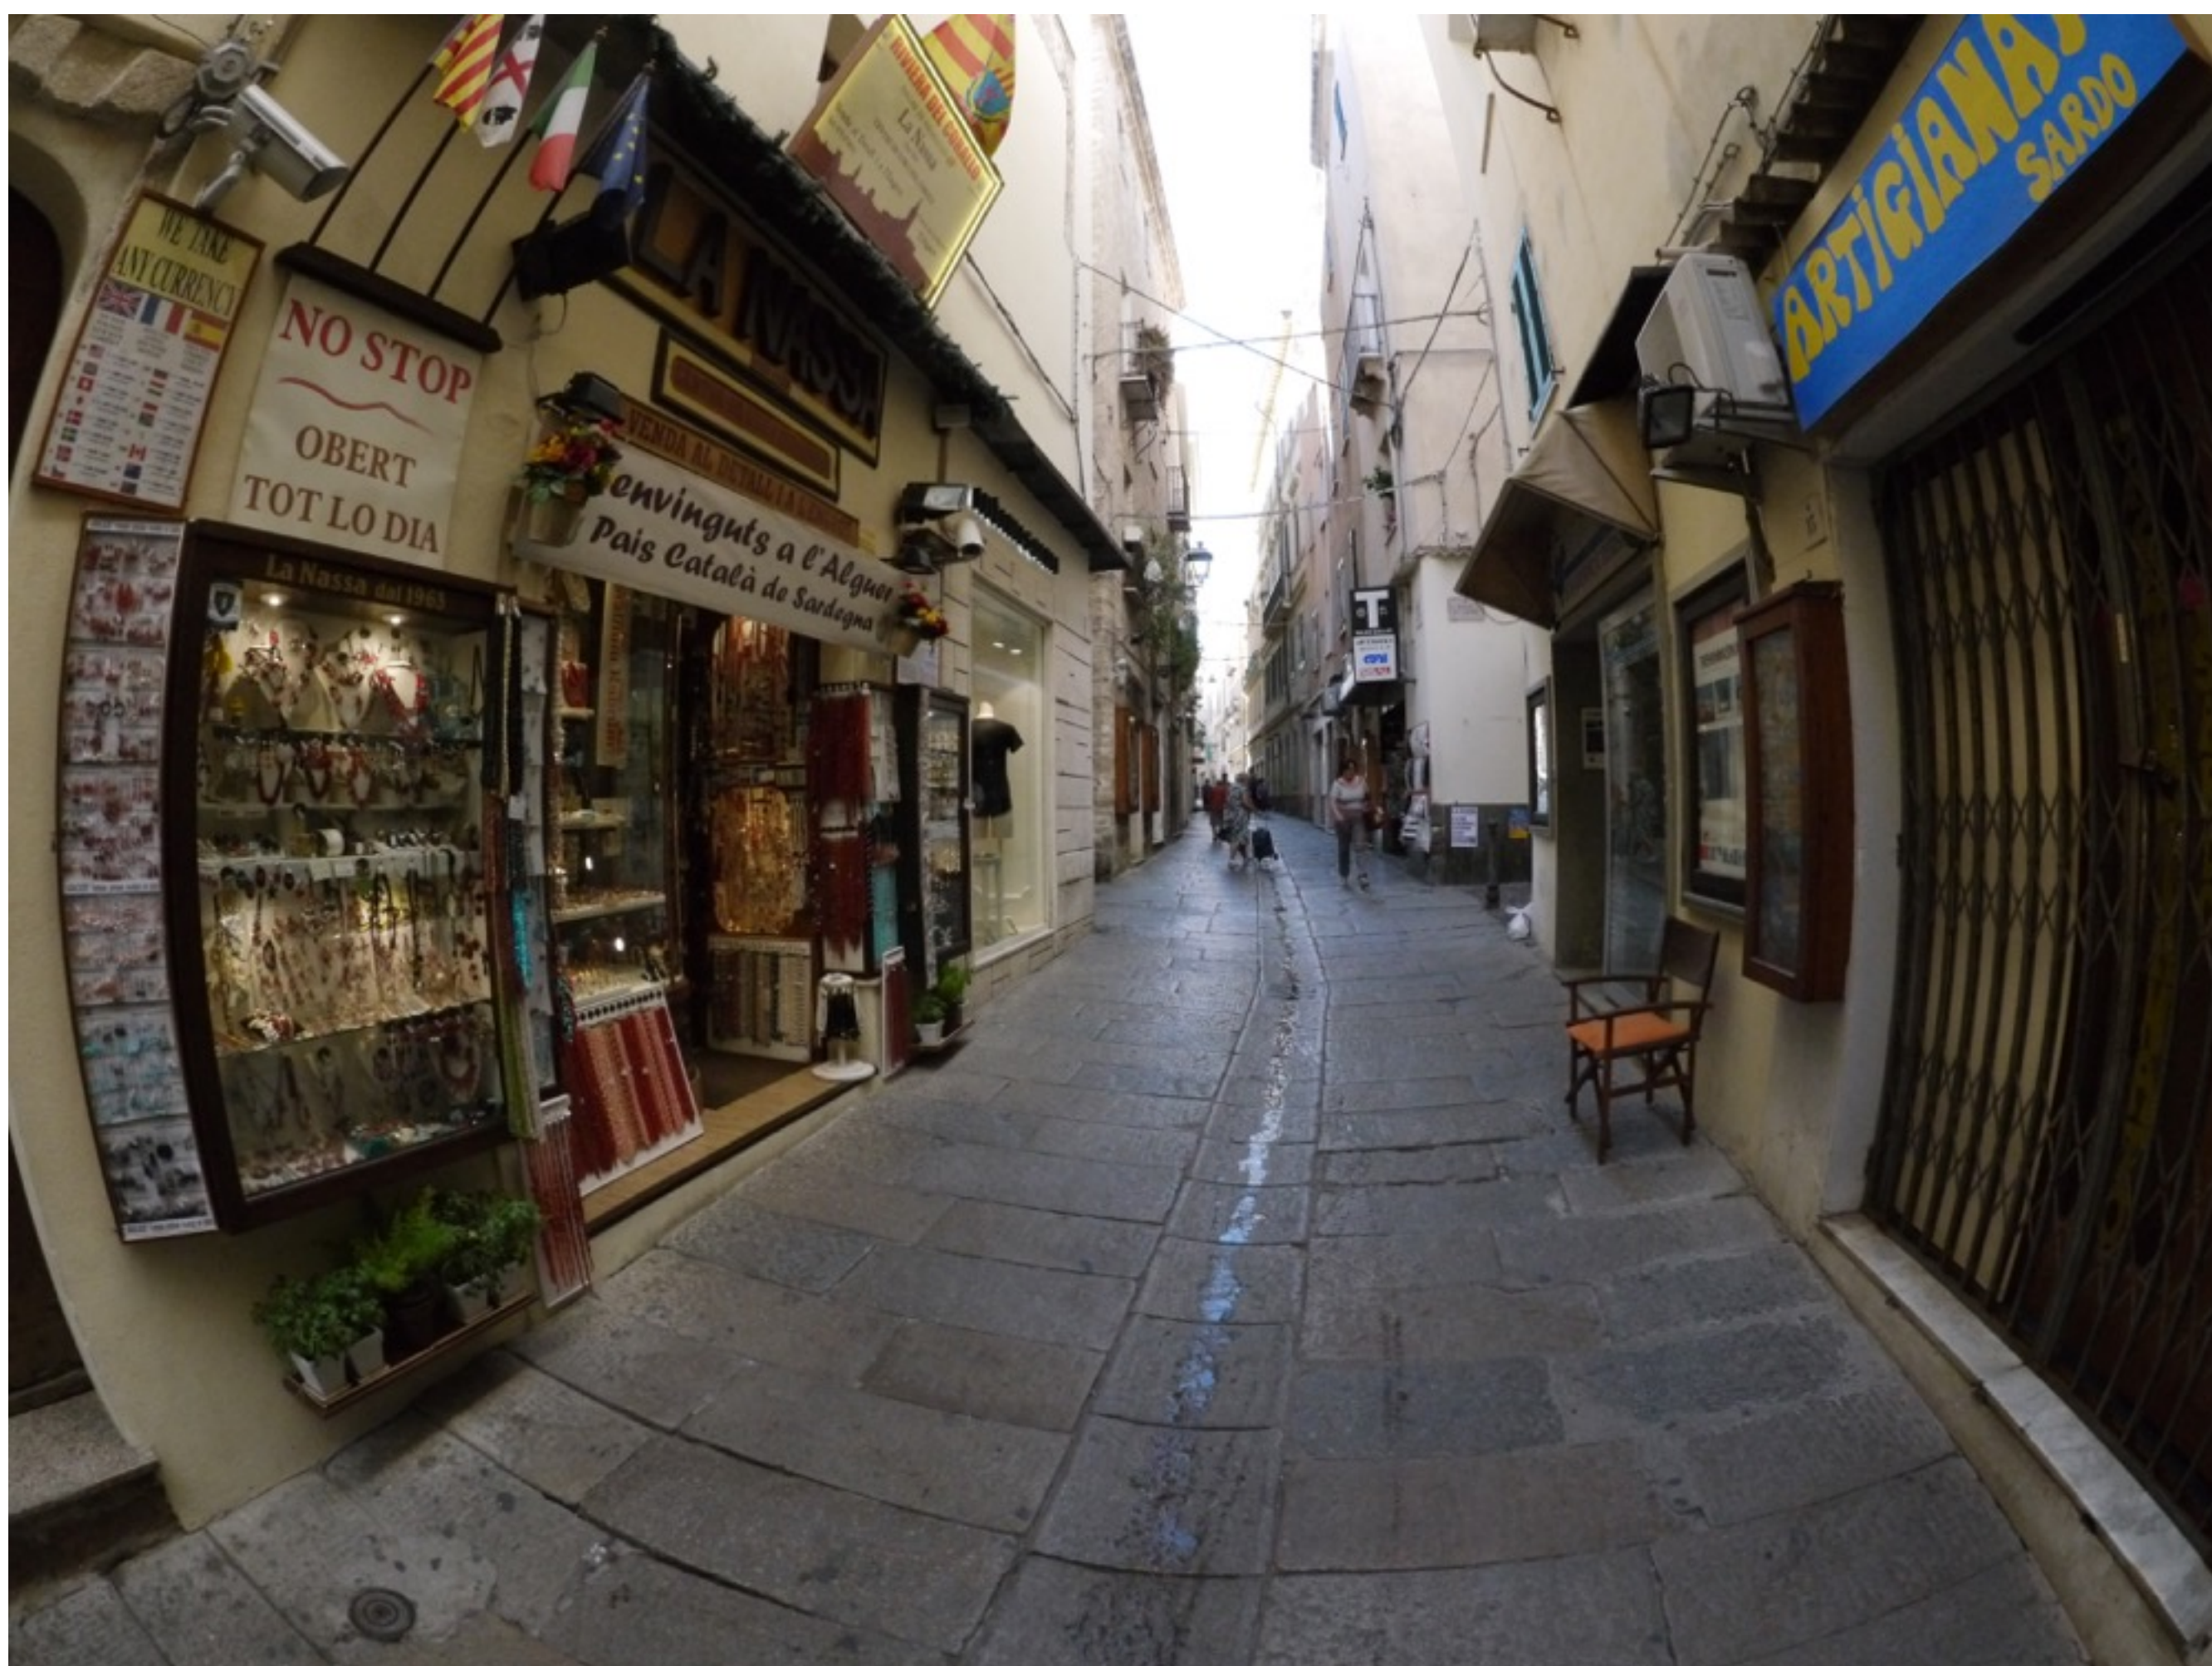

3

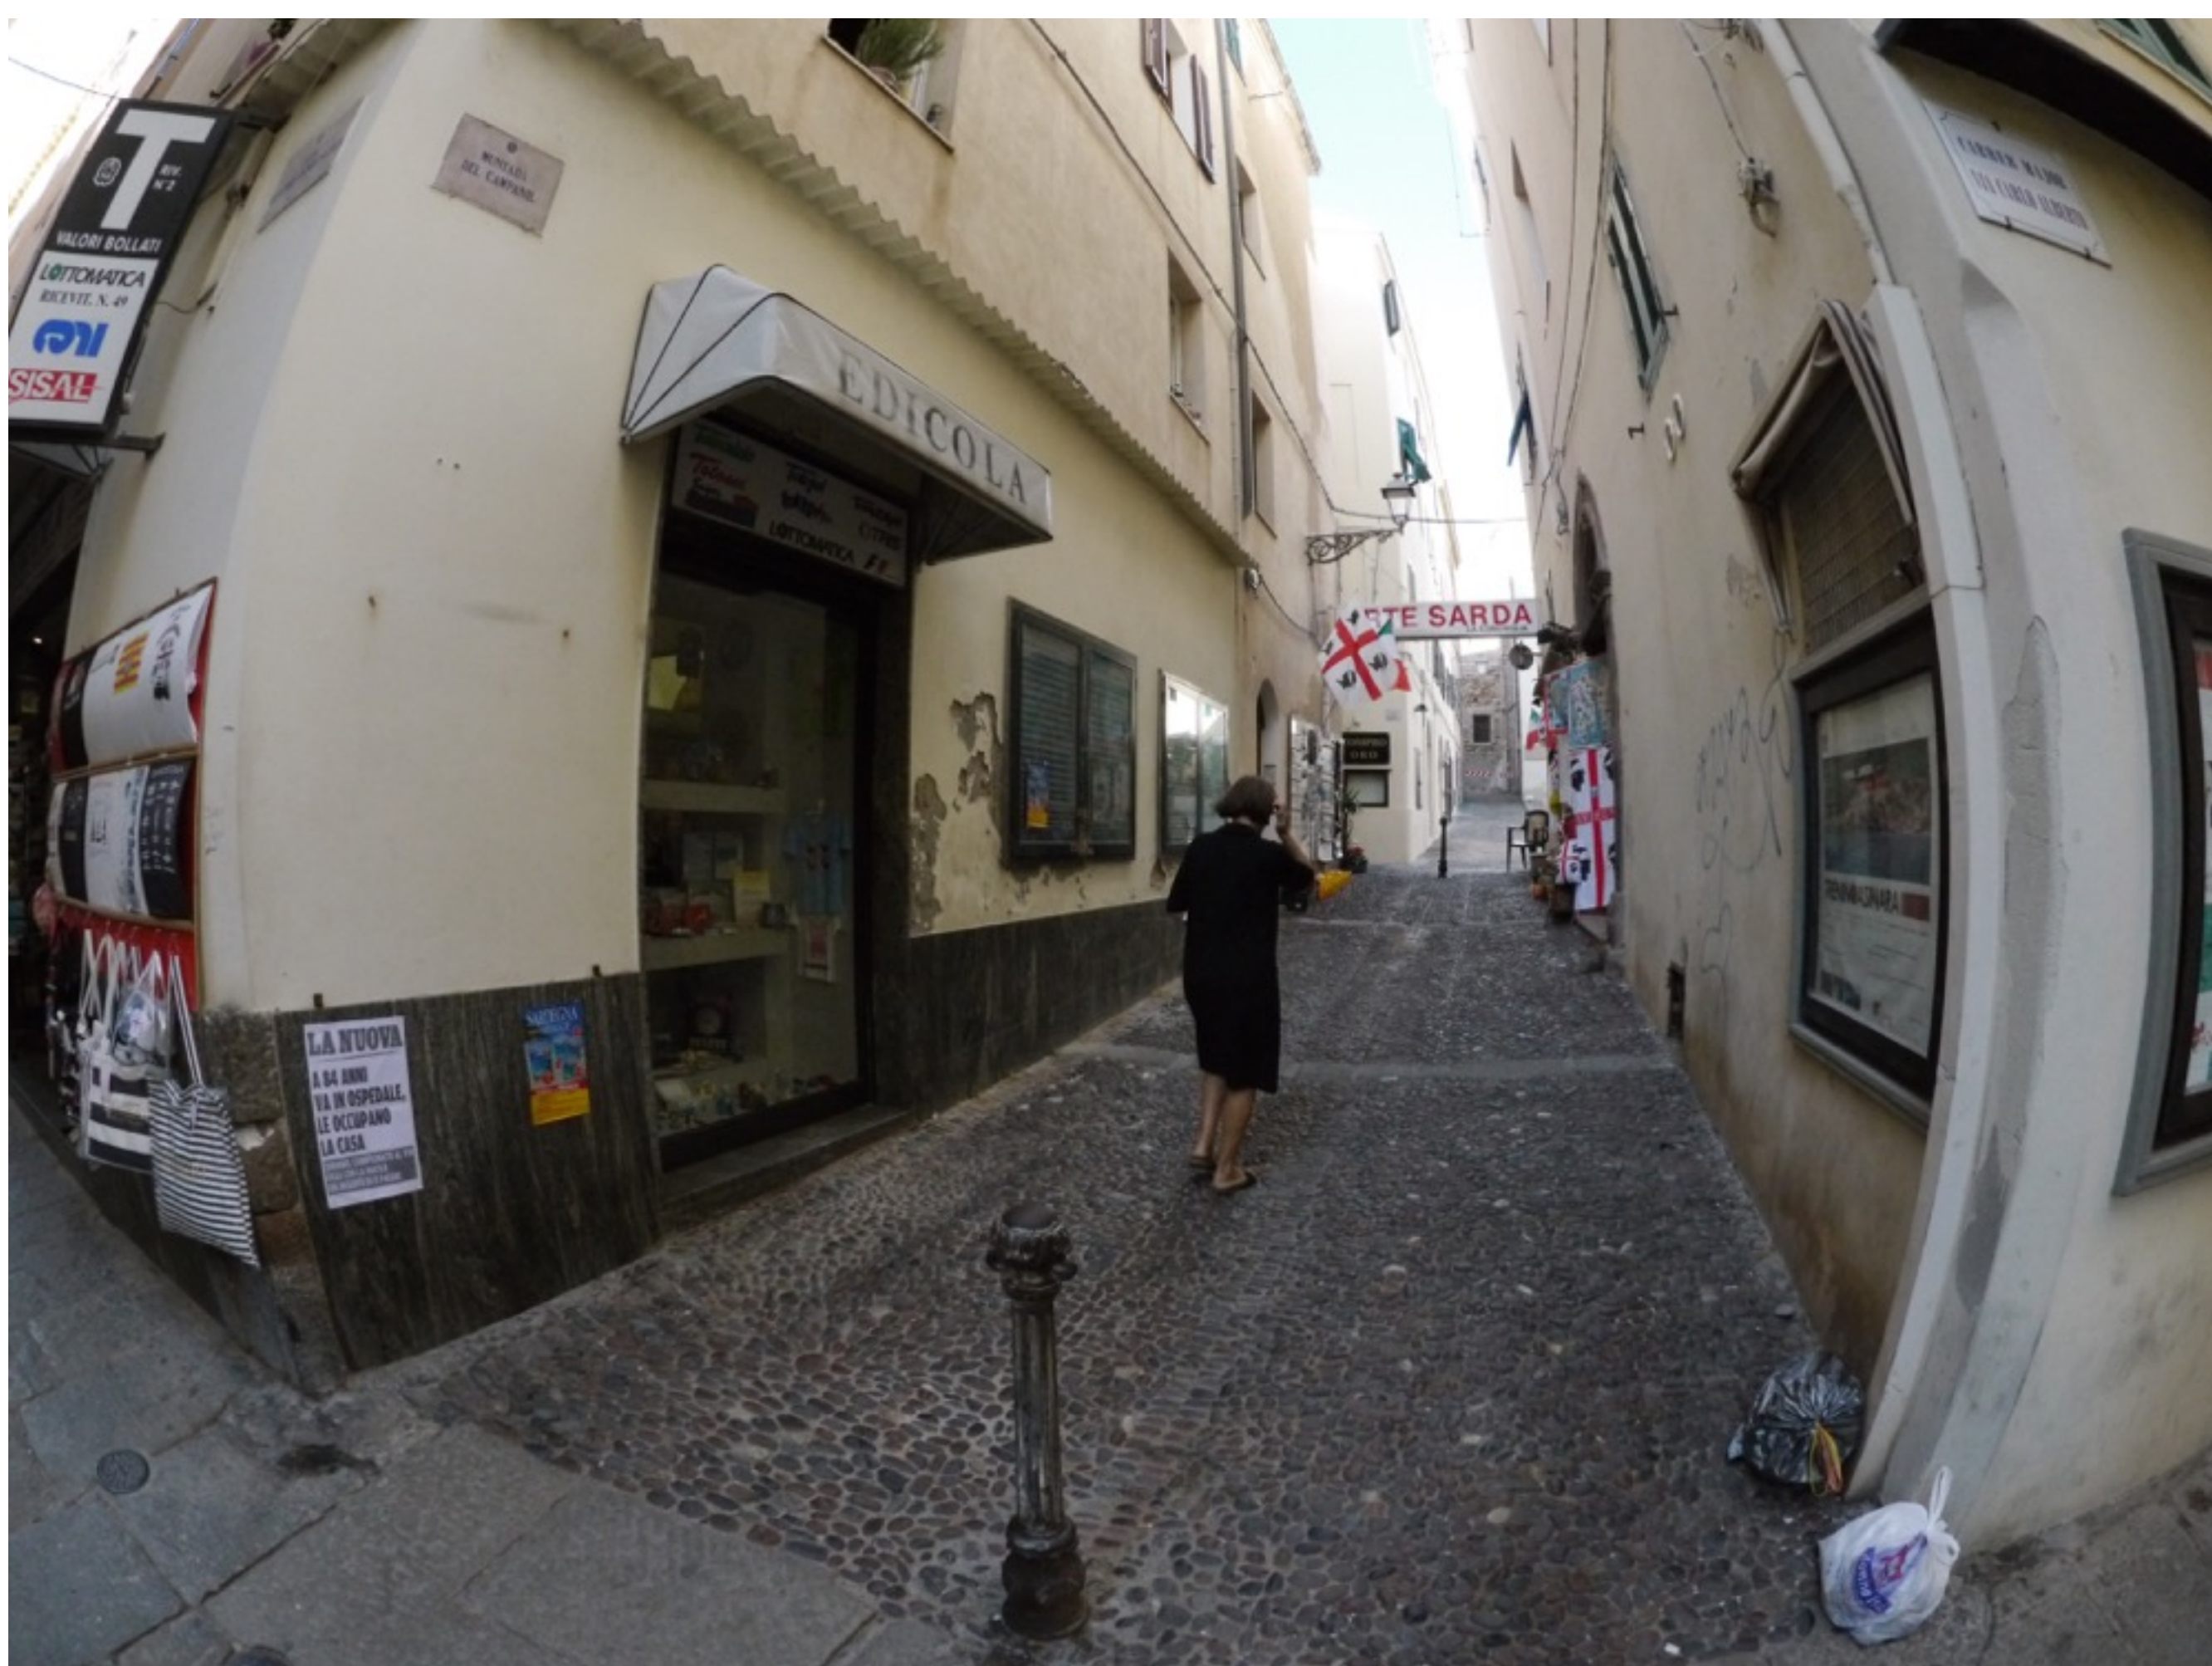

4



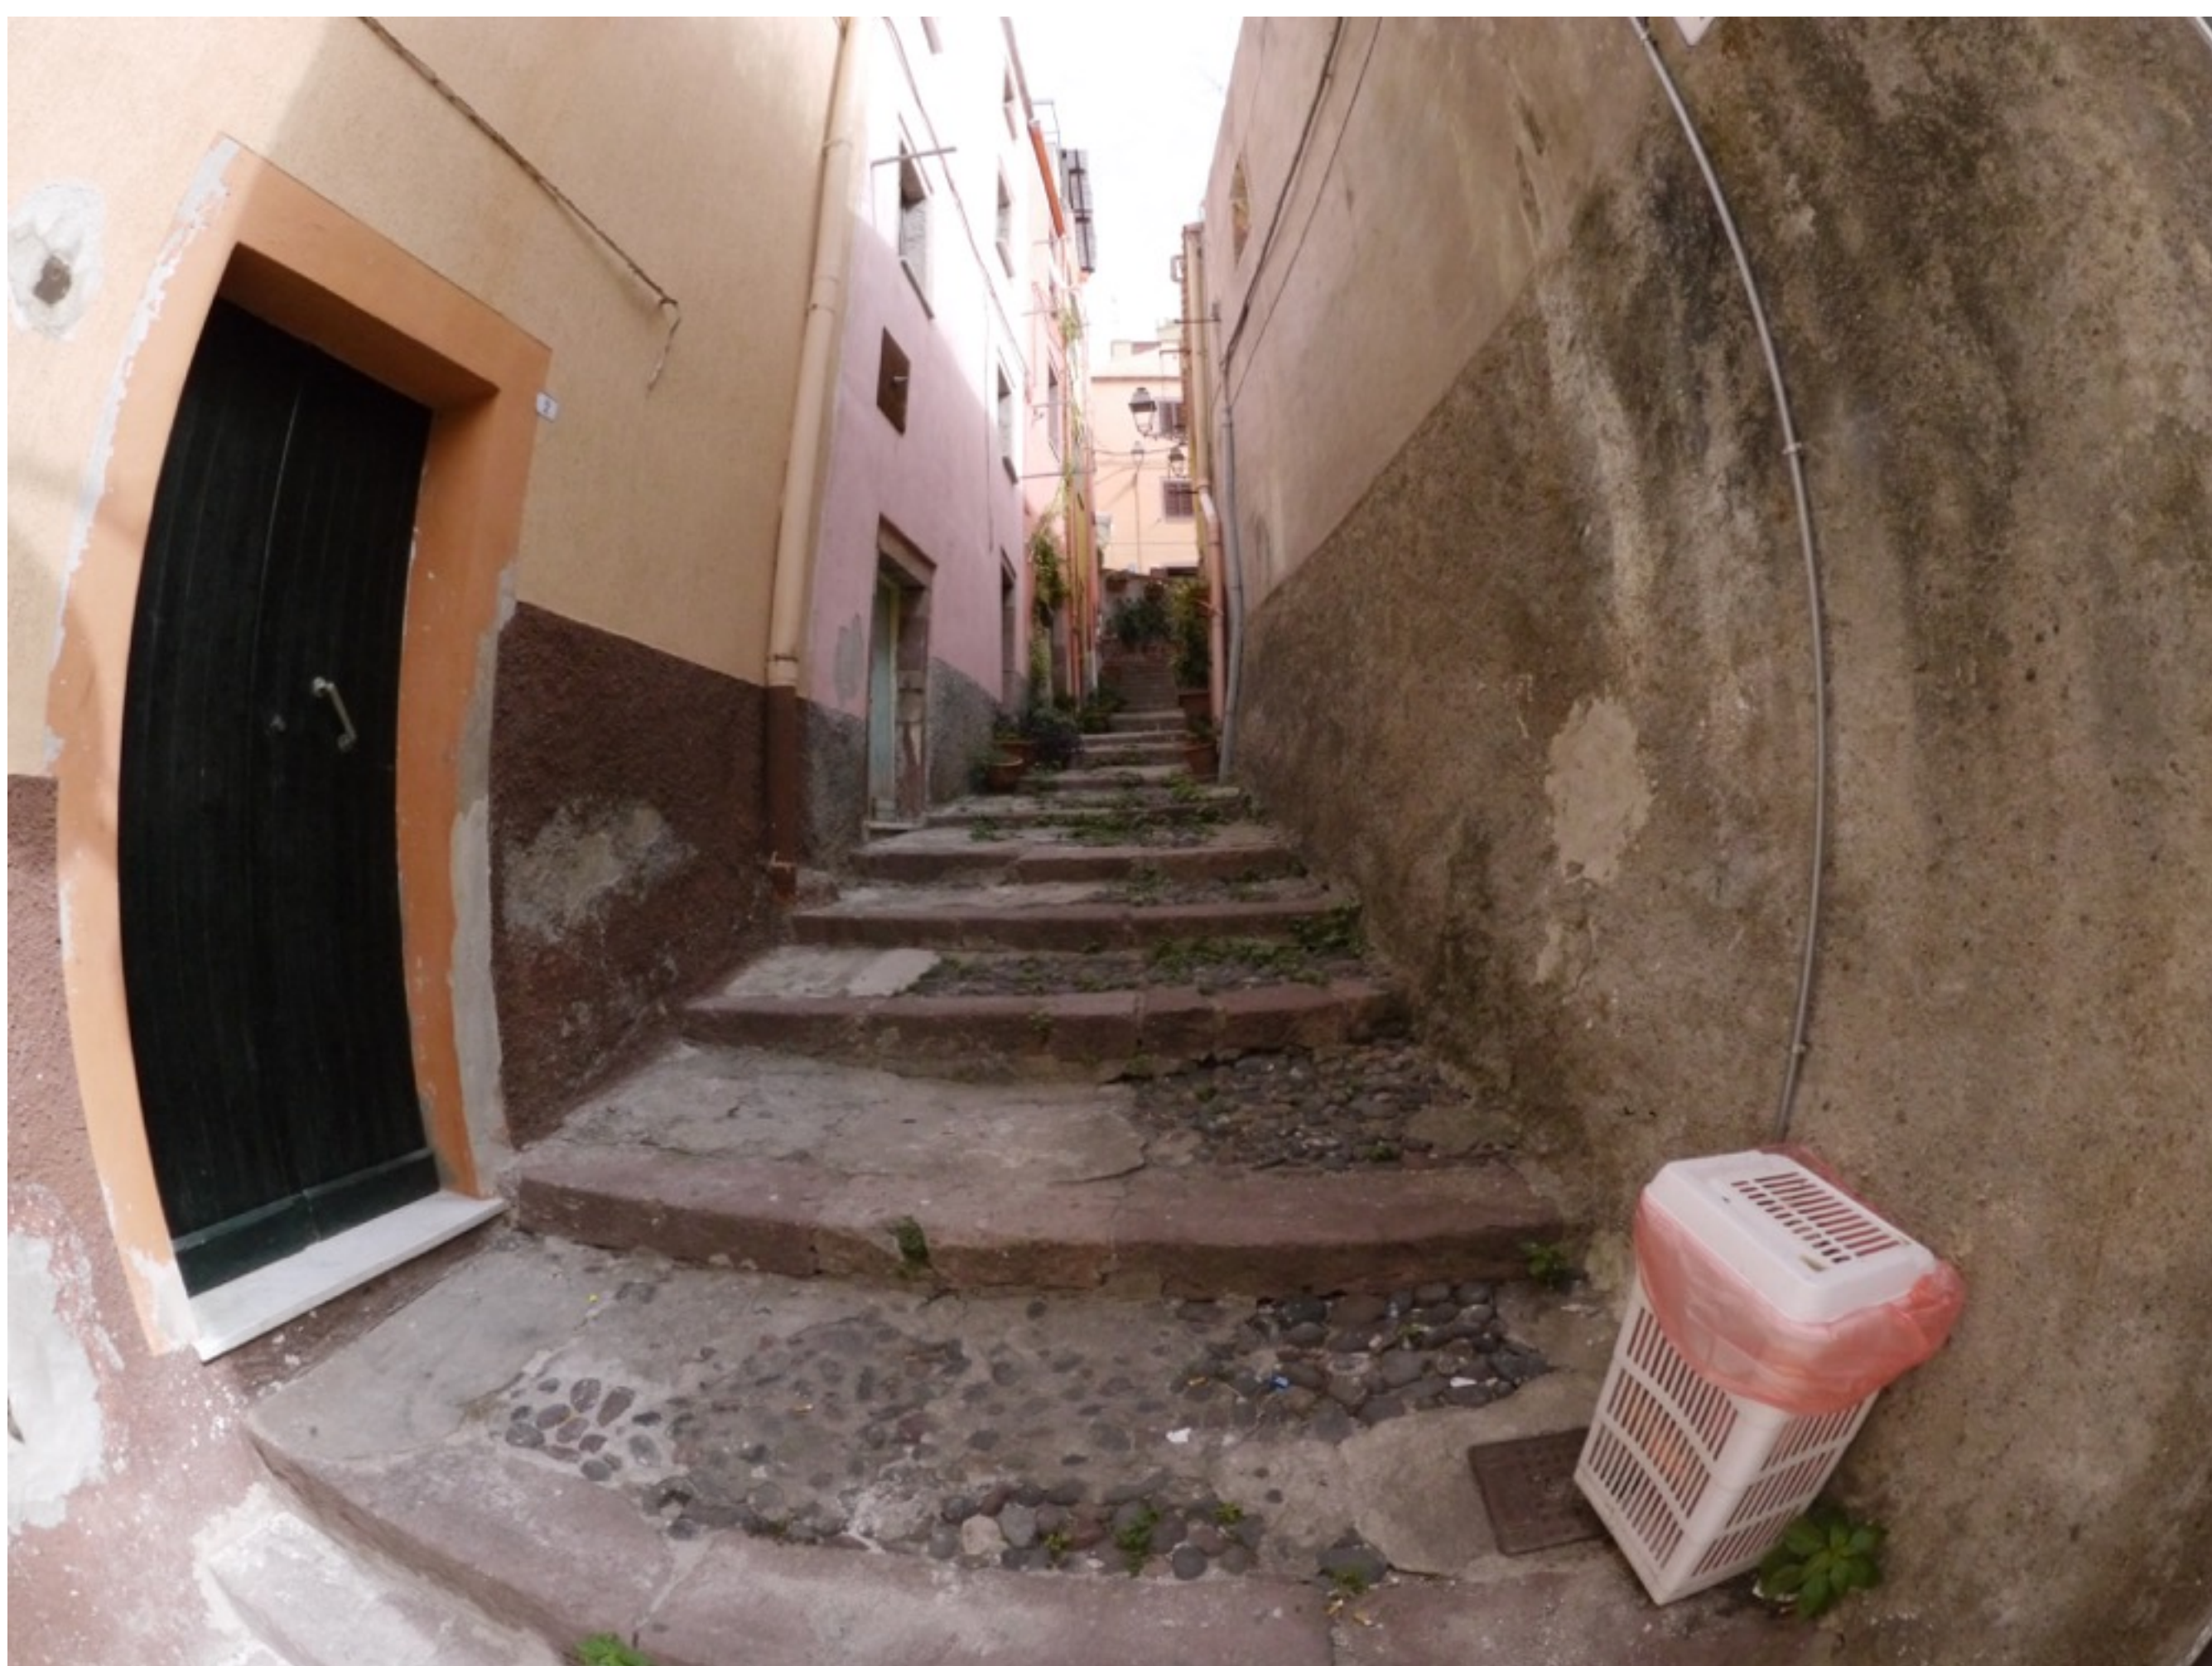

5

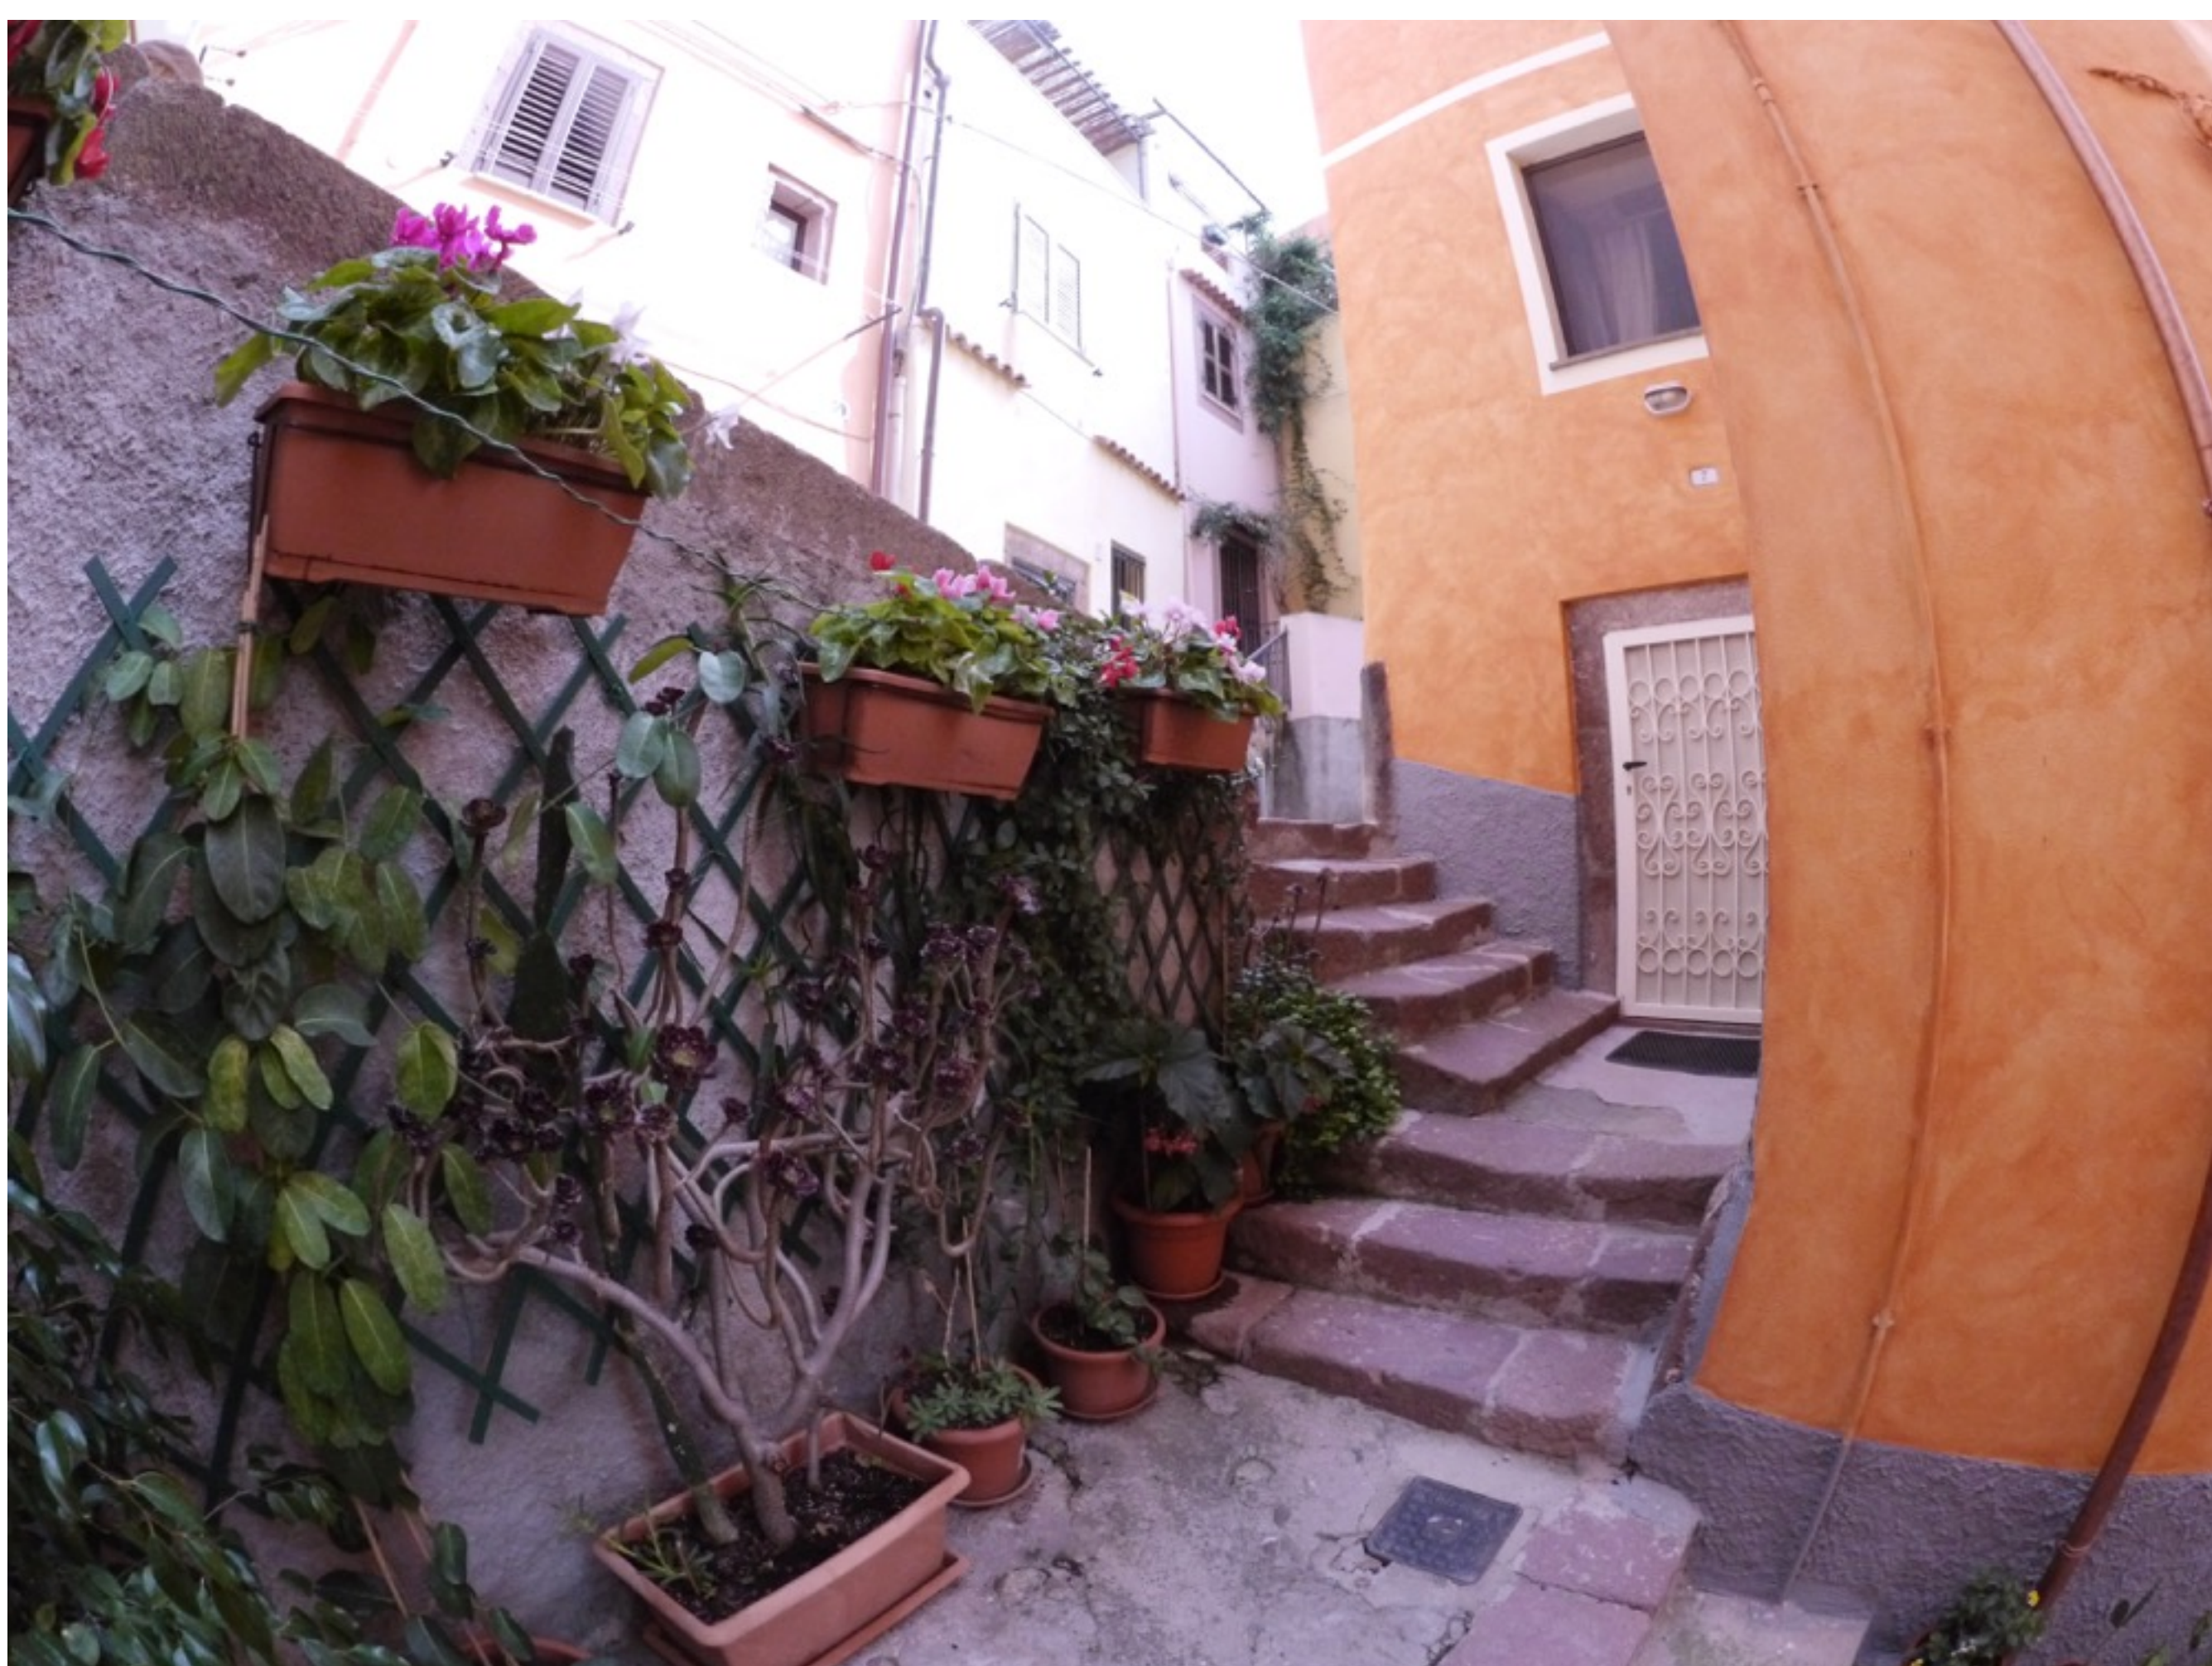

6



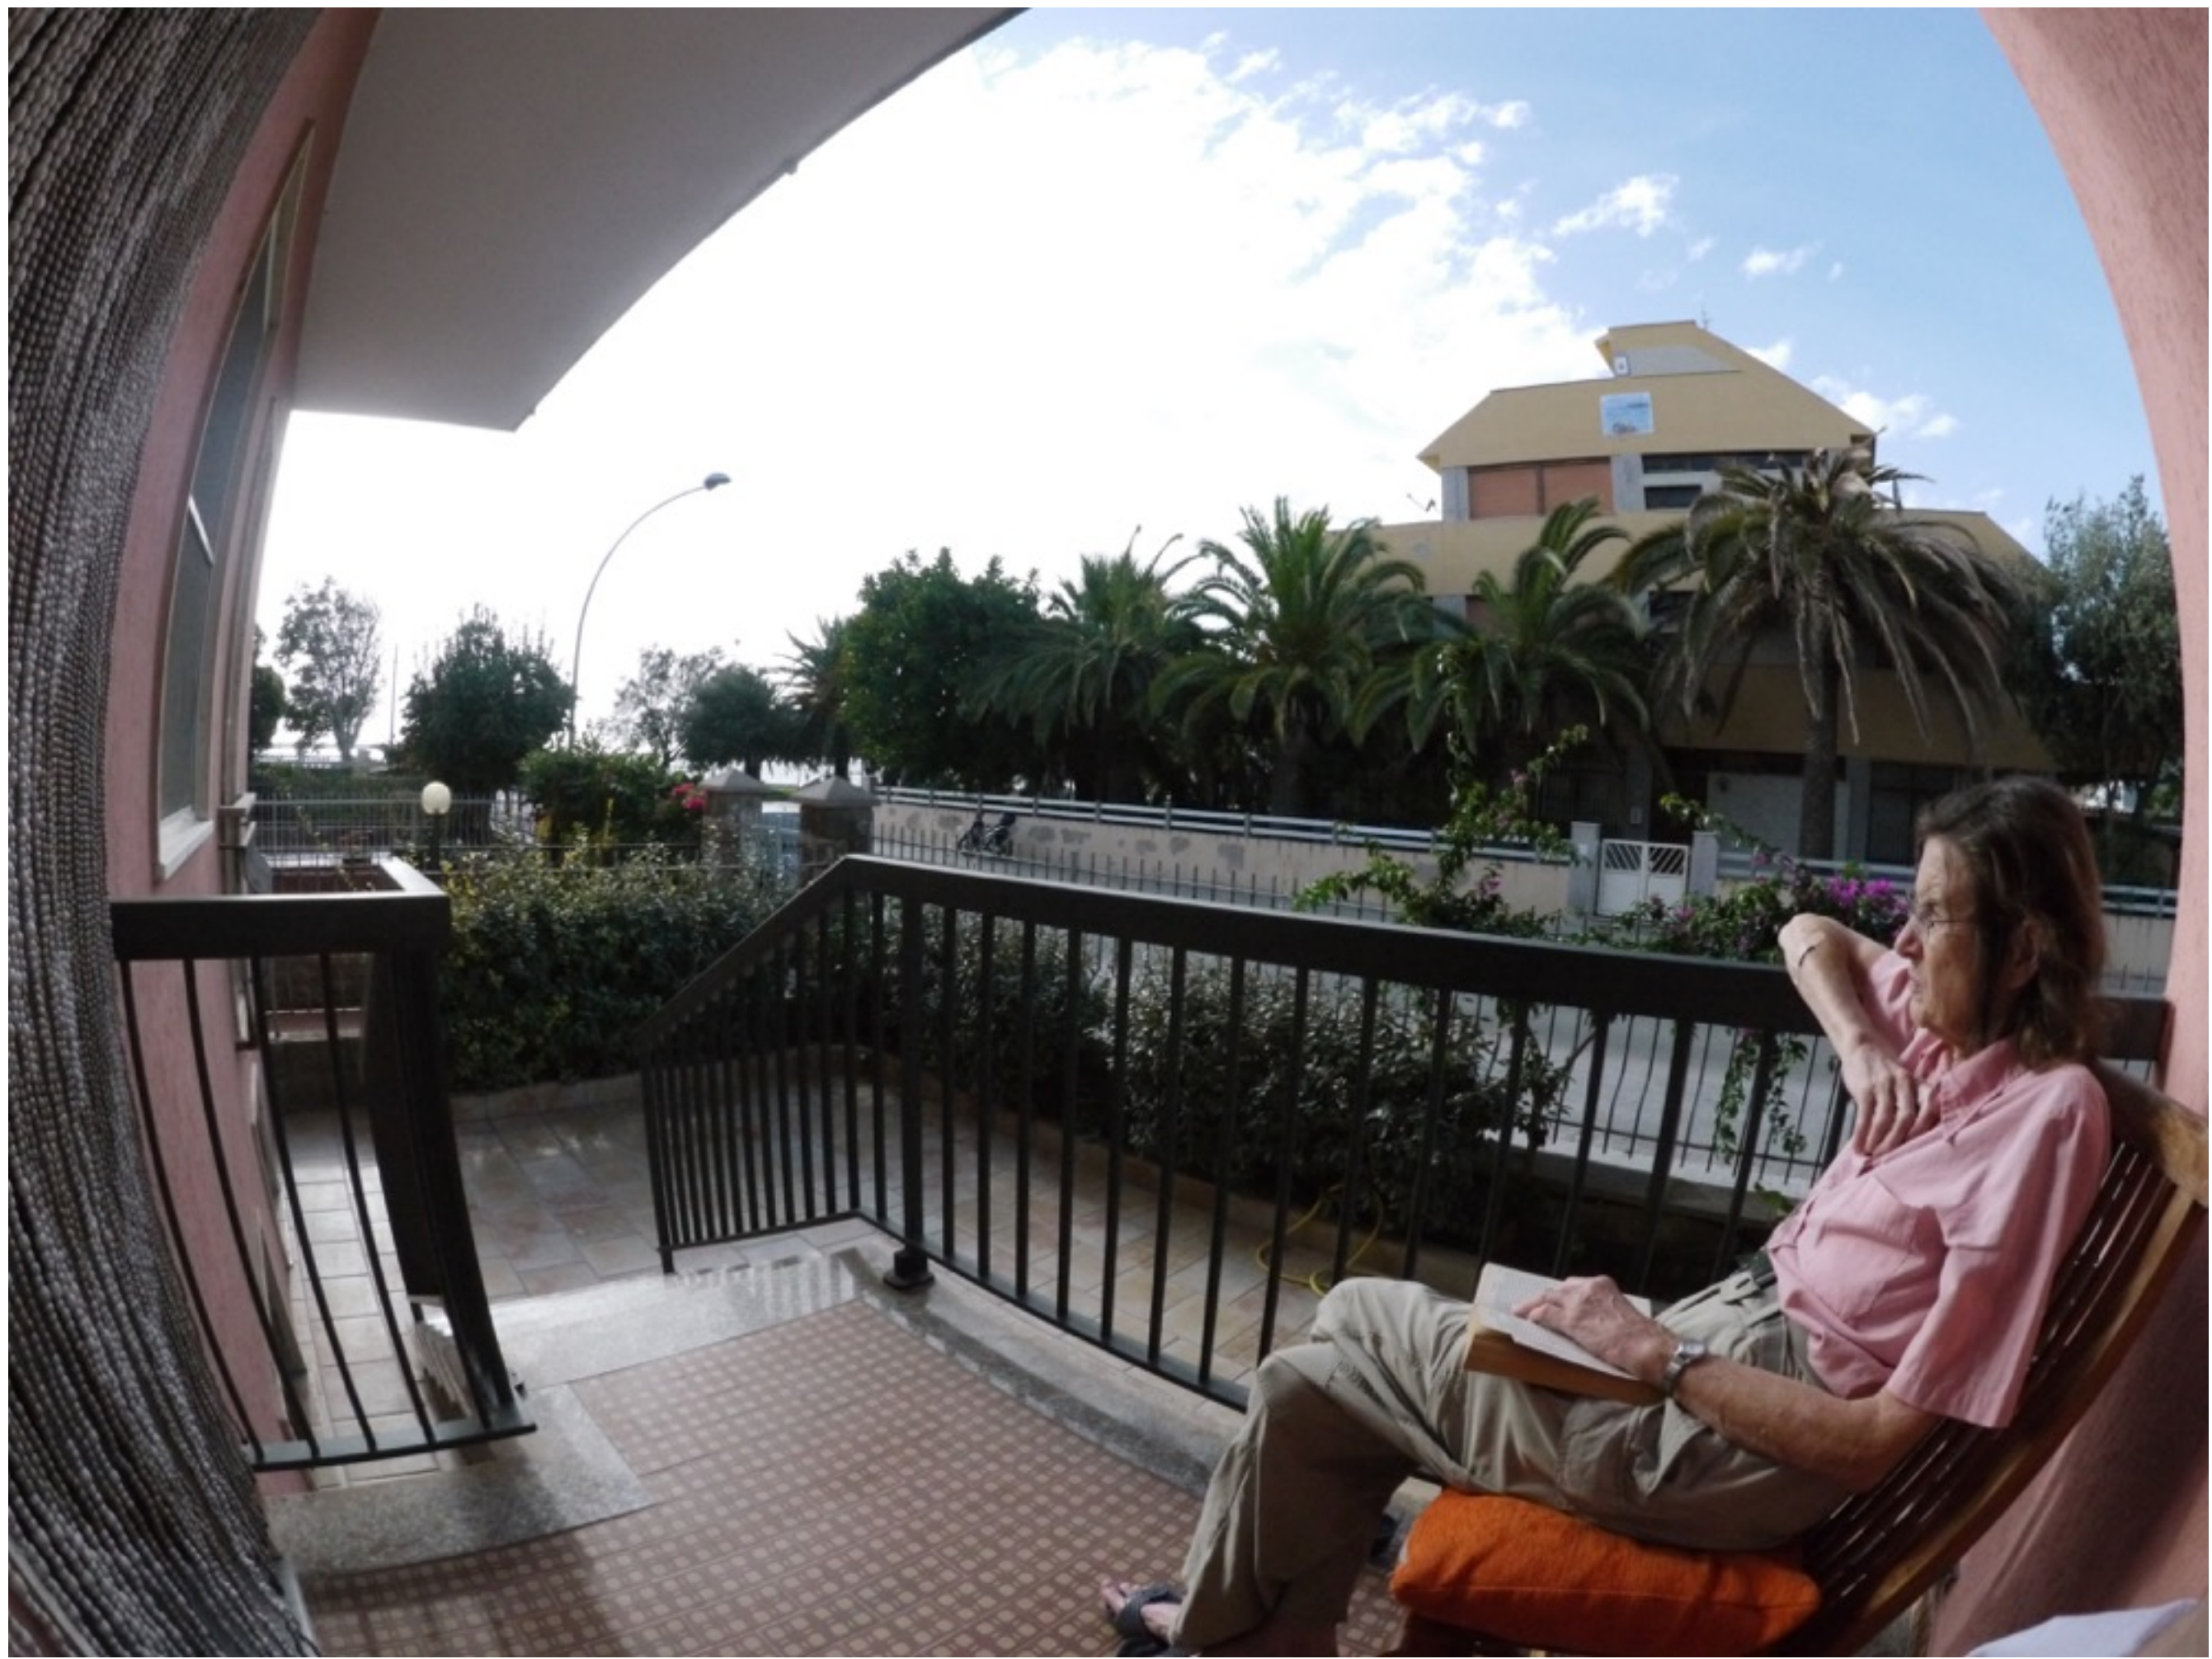

7

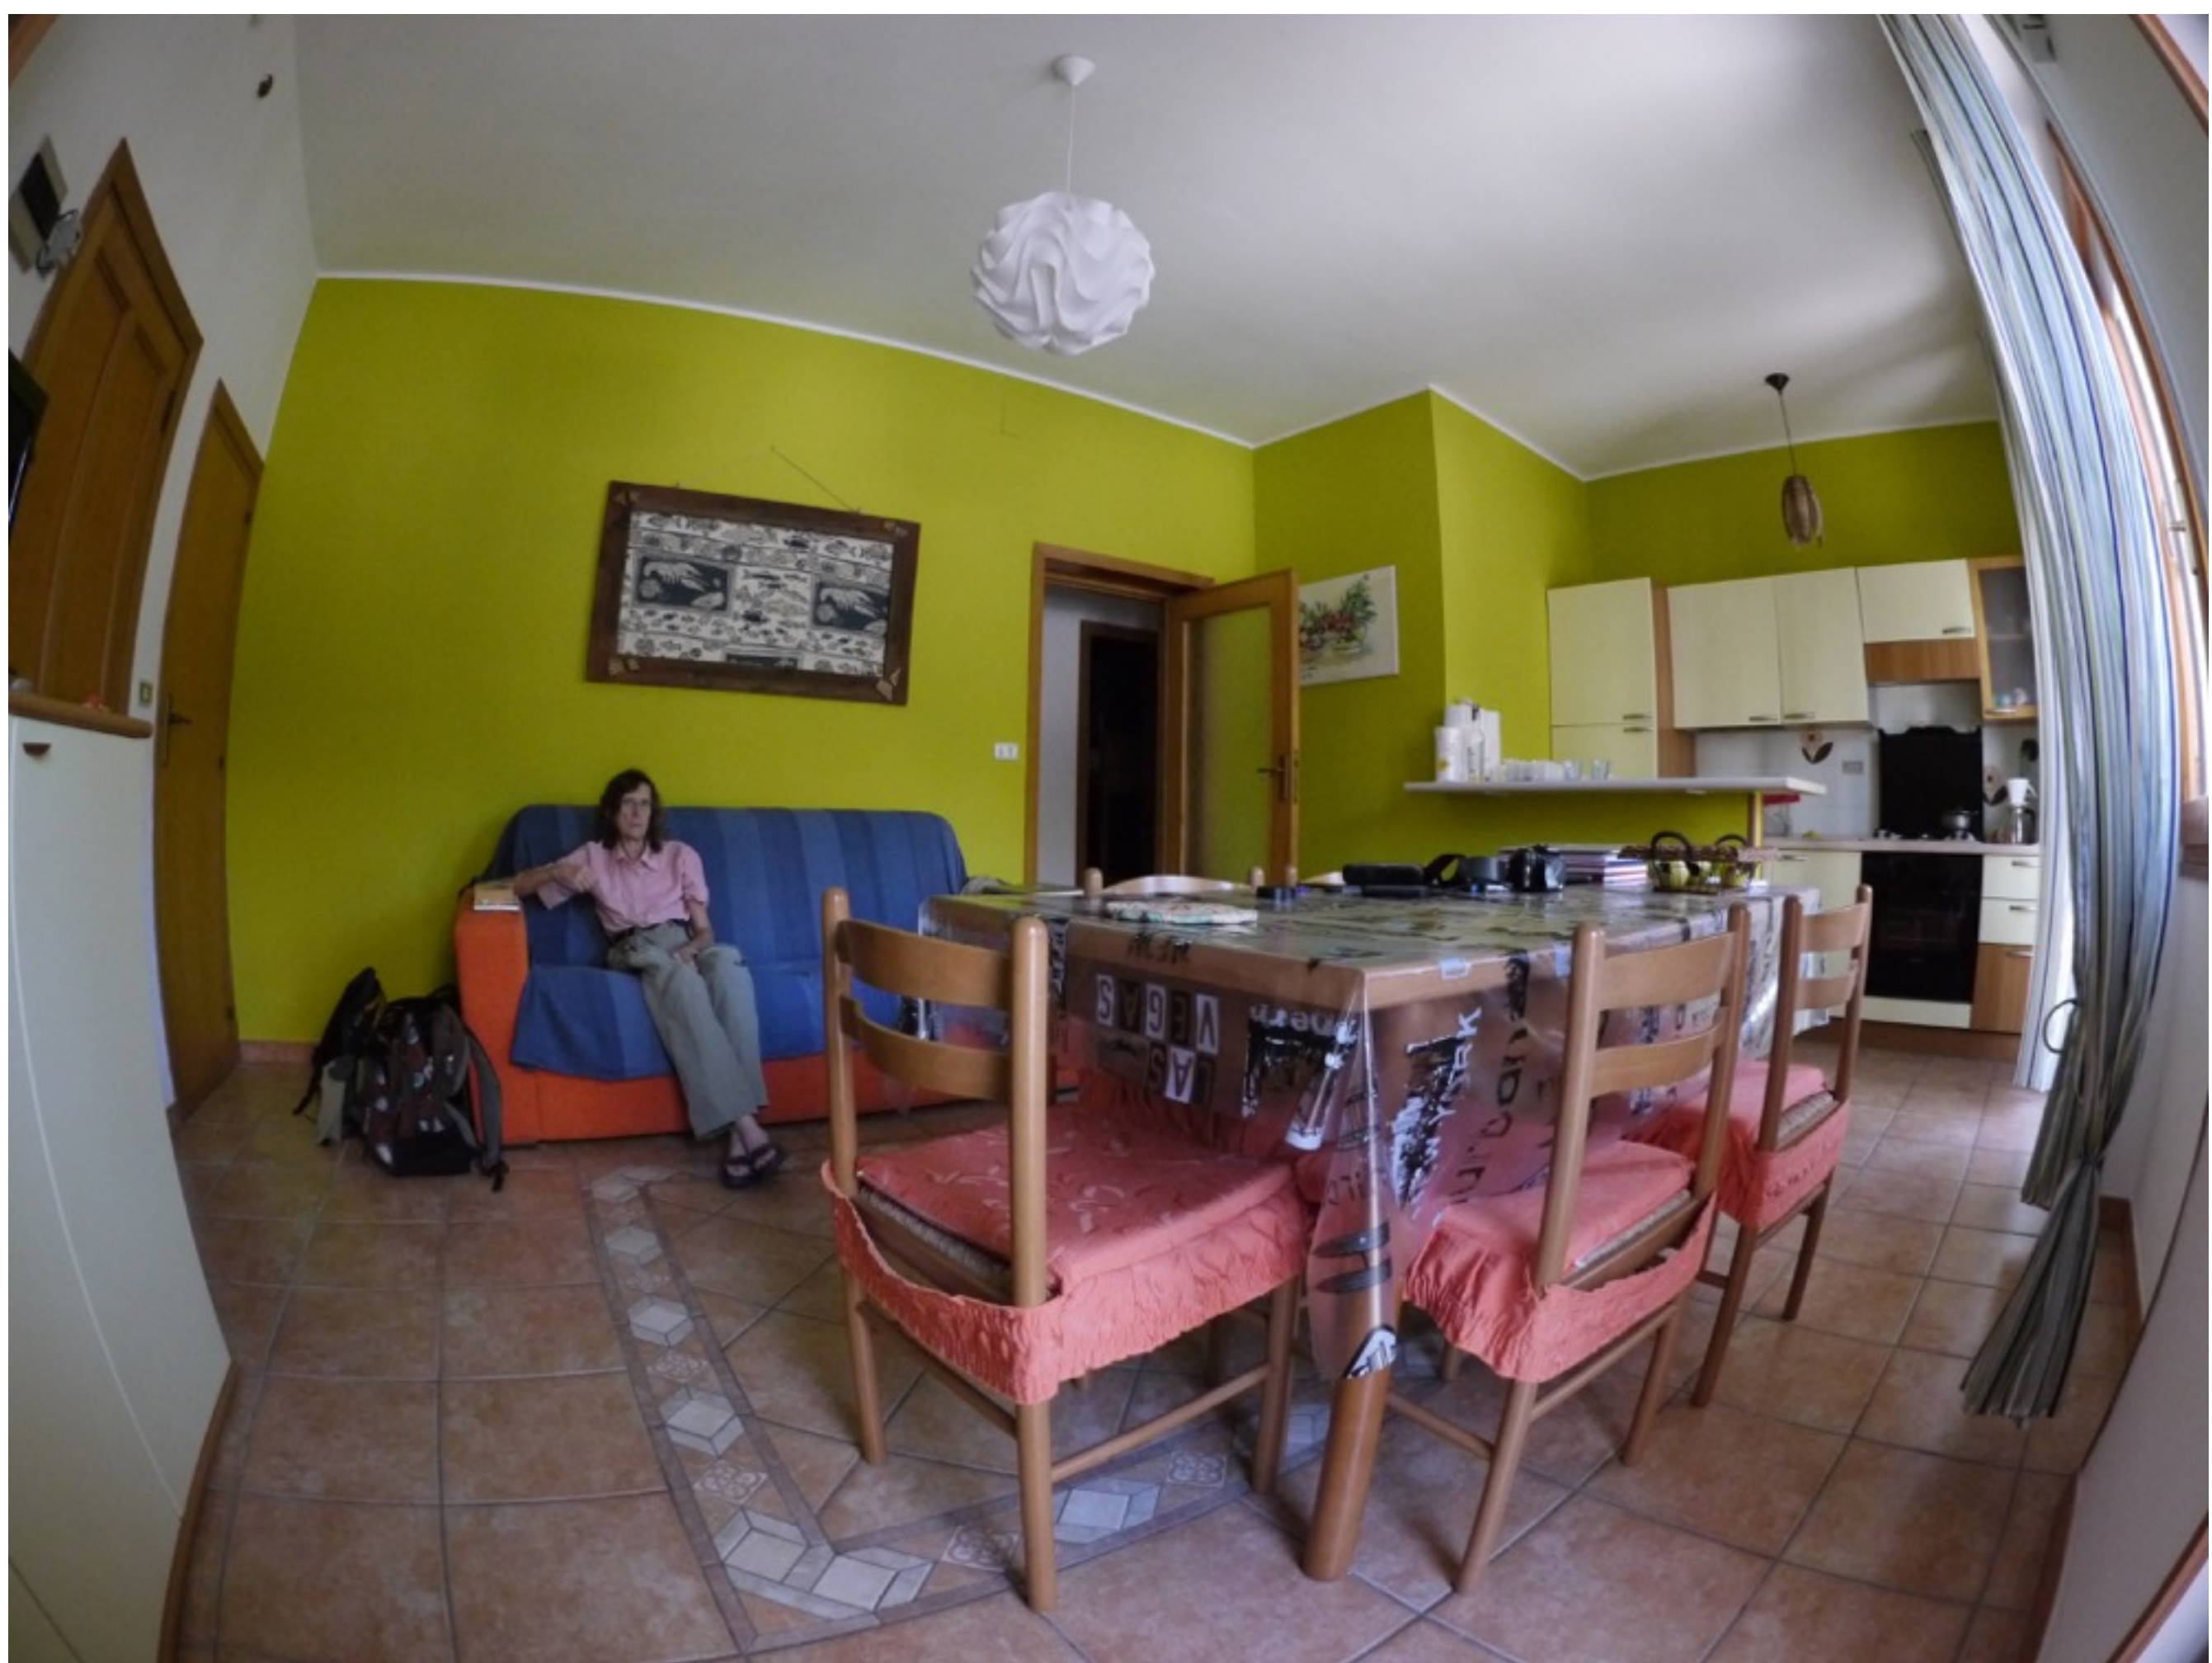

8



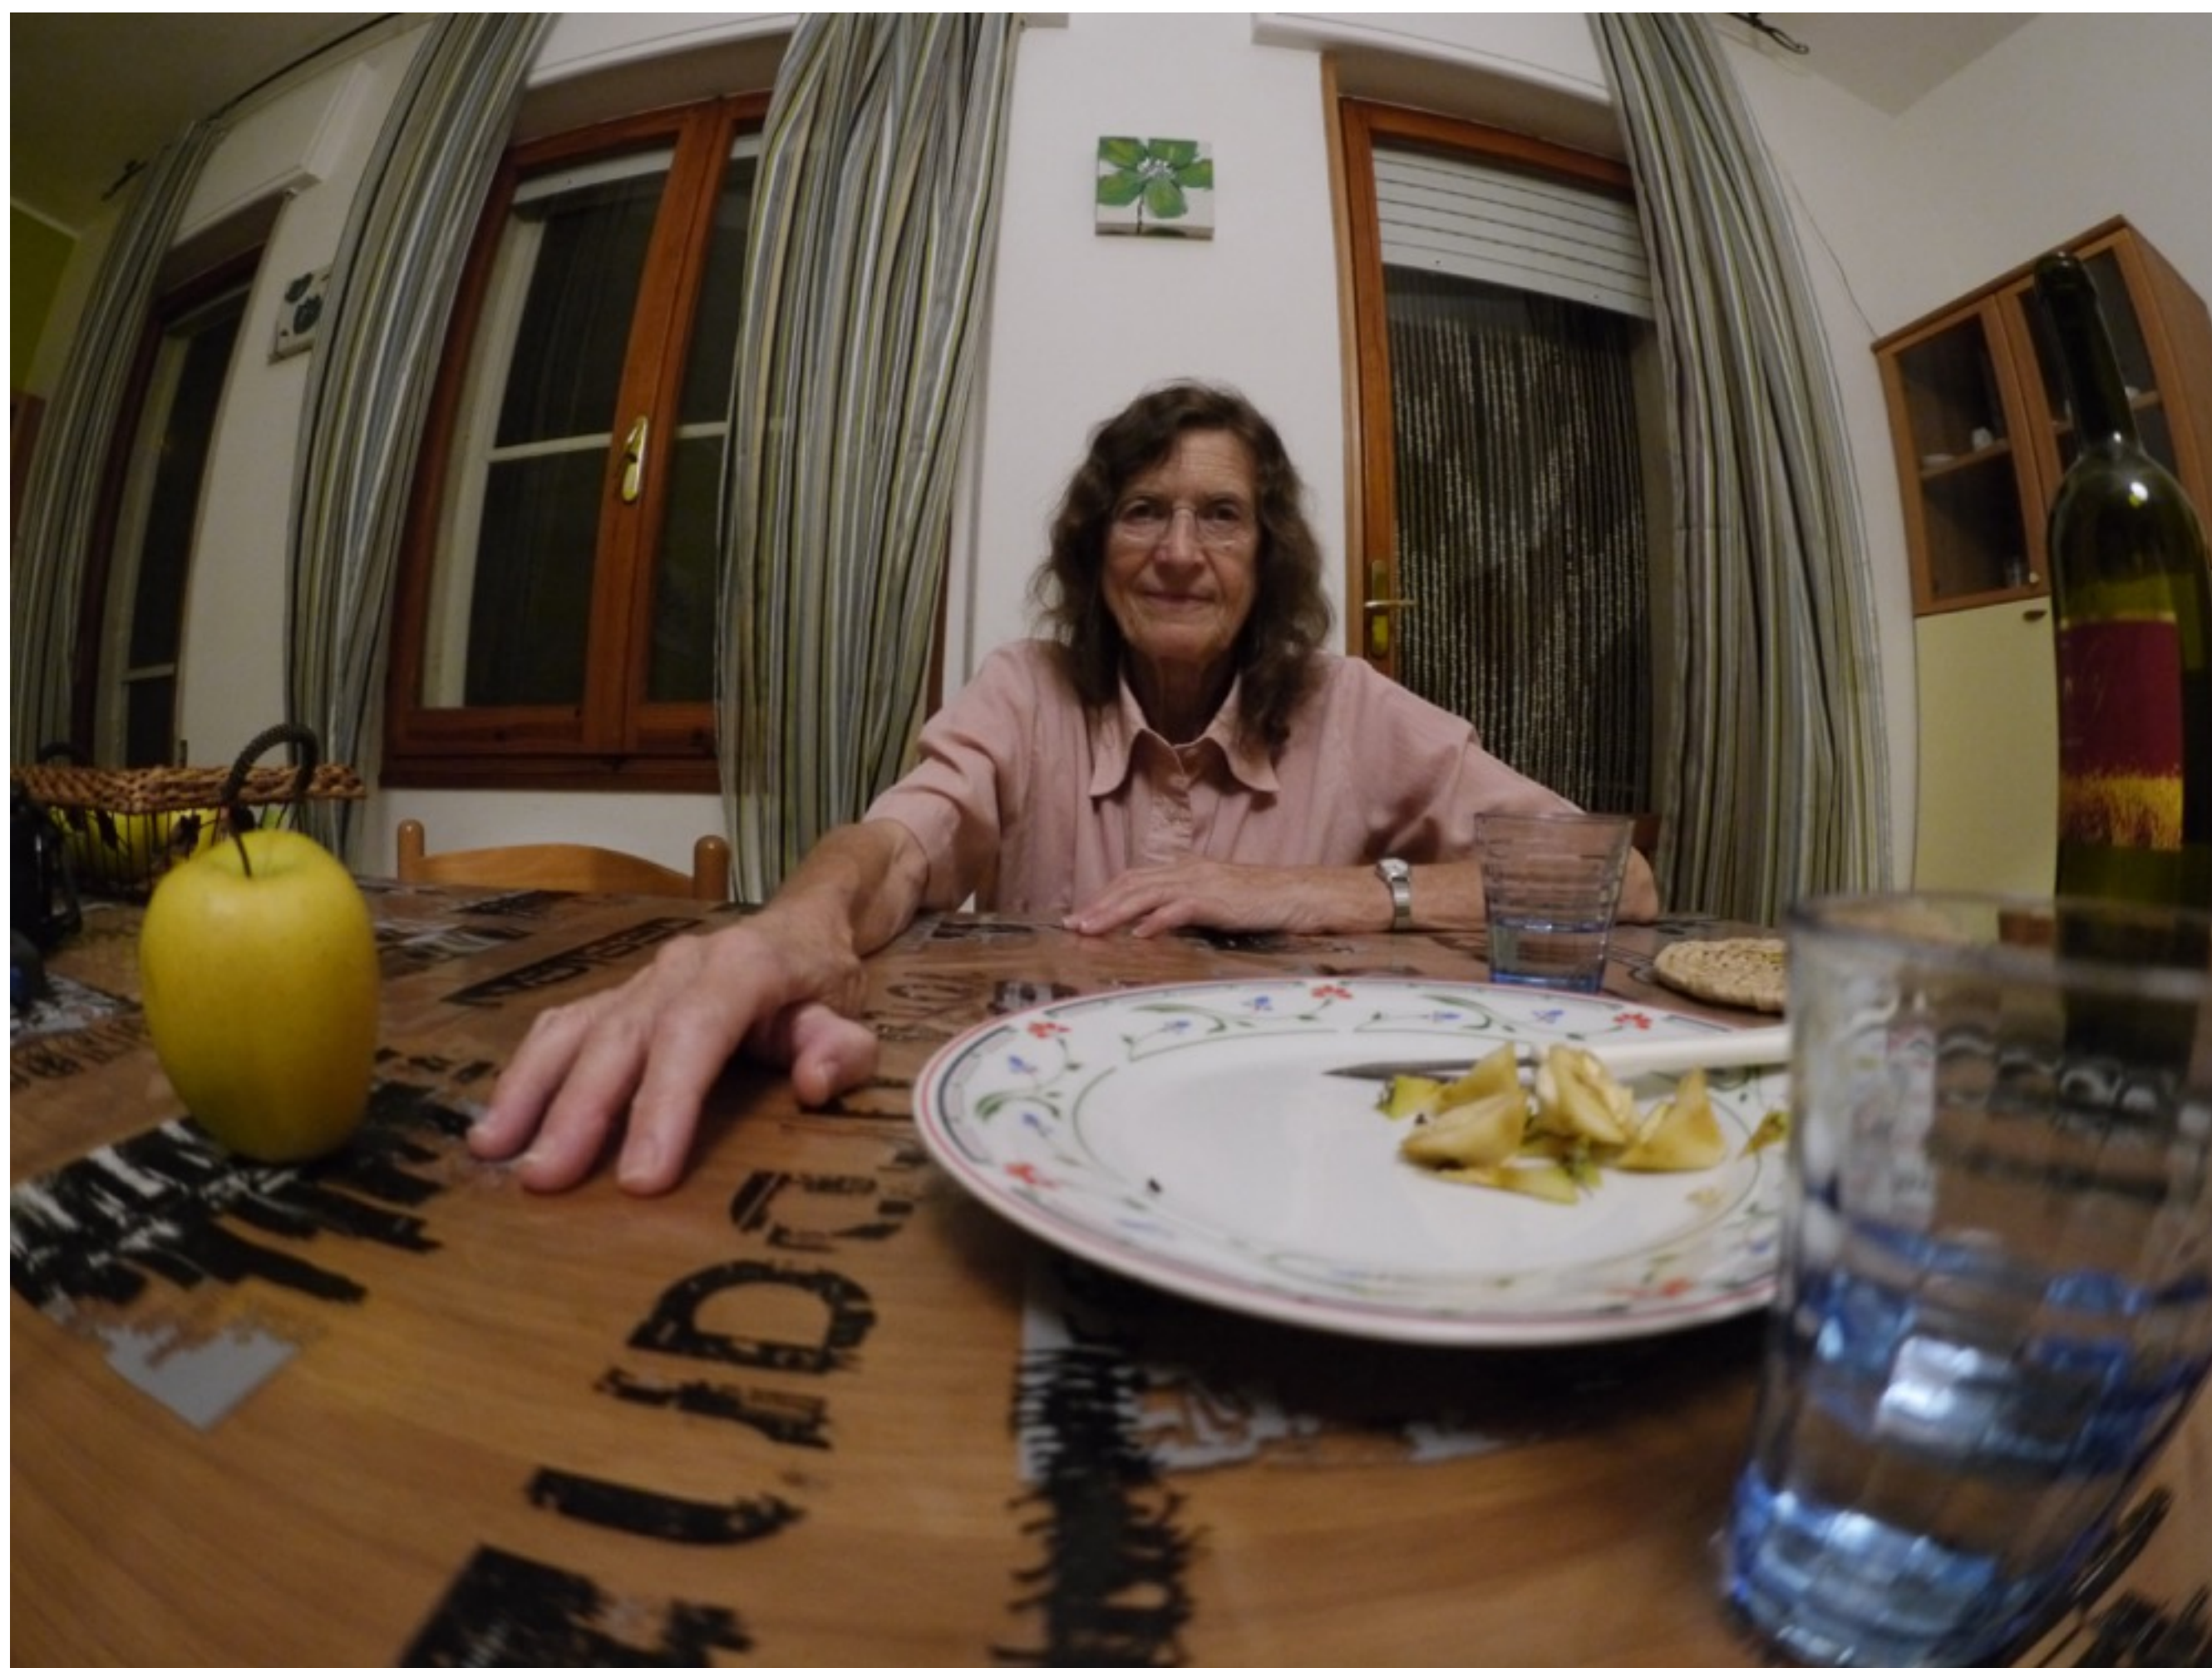

9

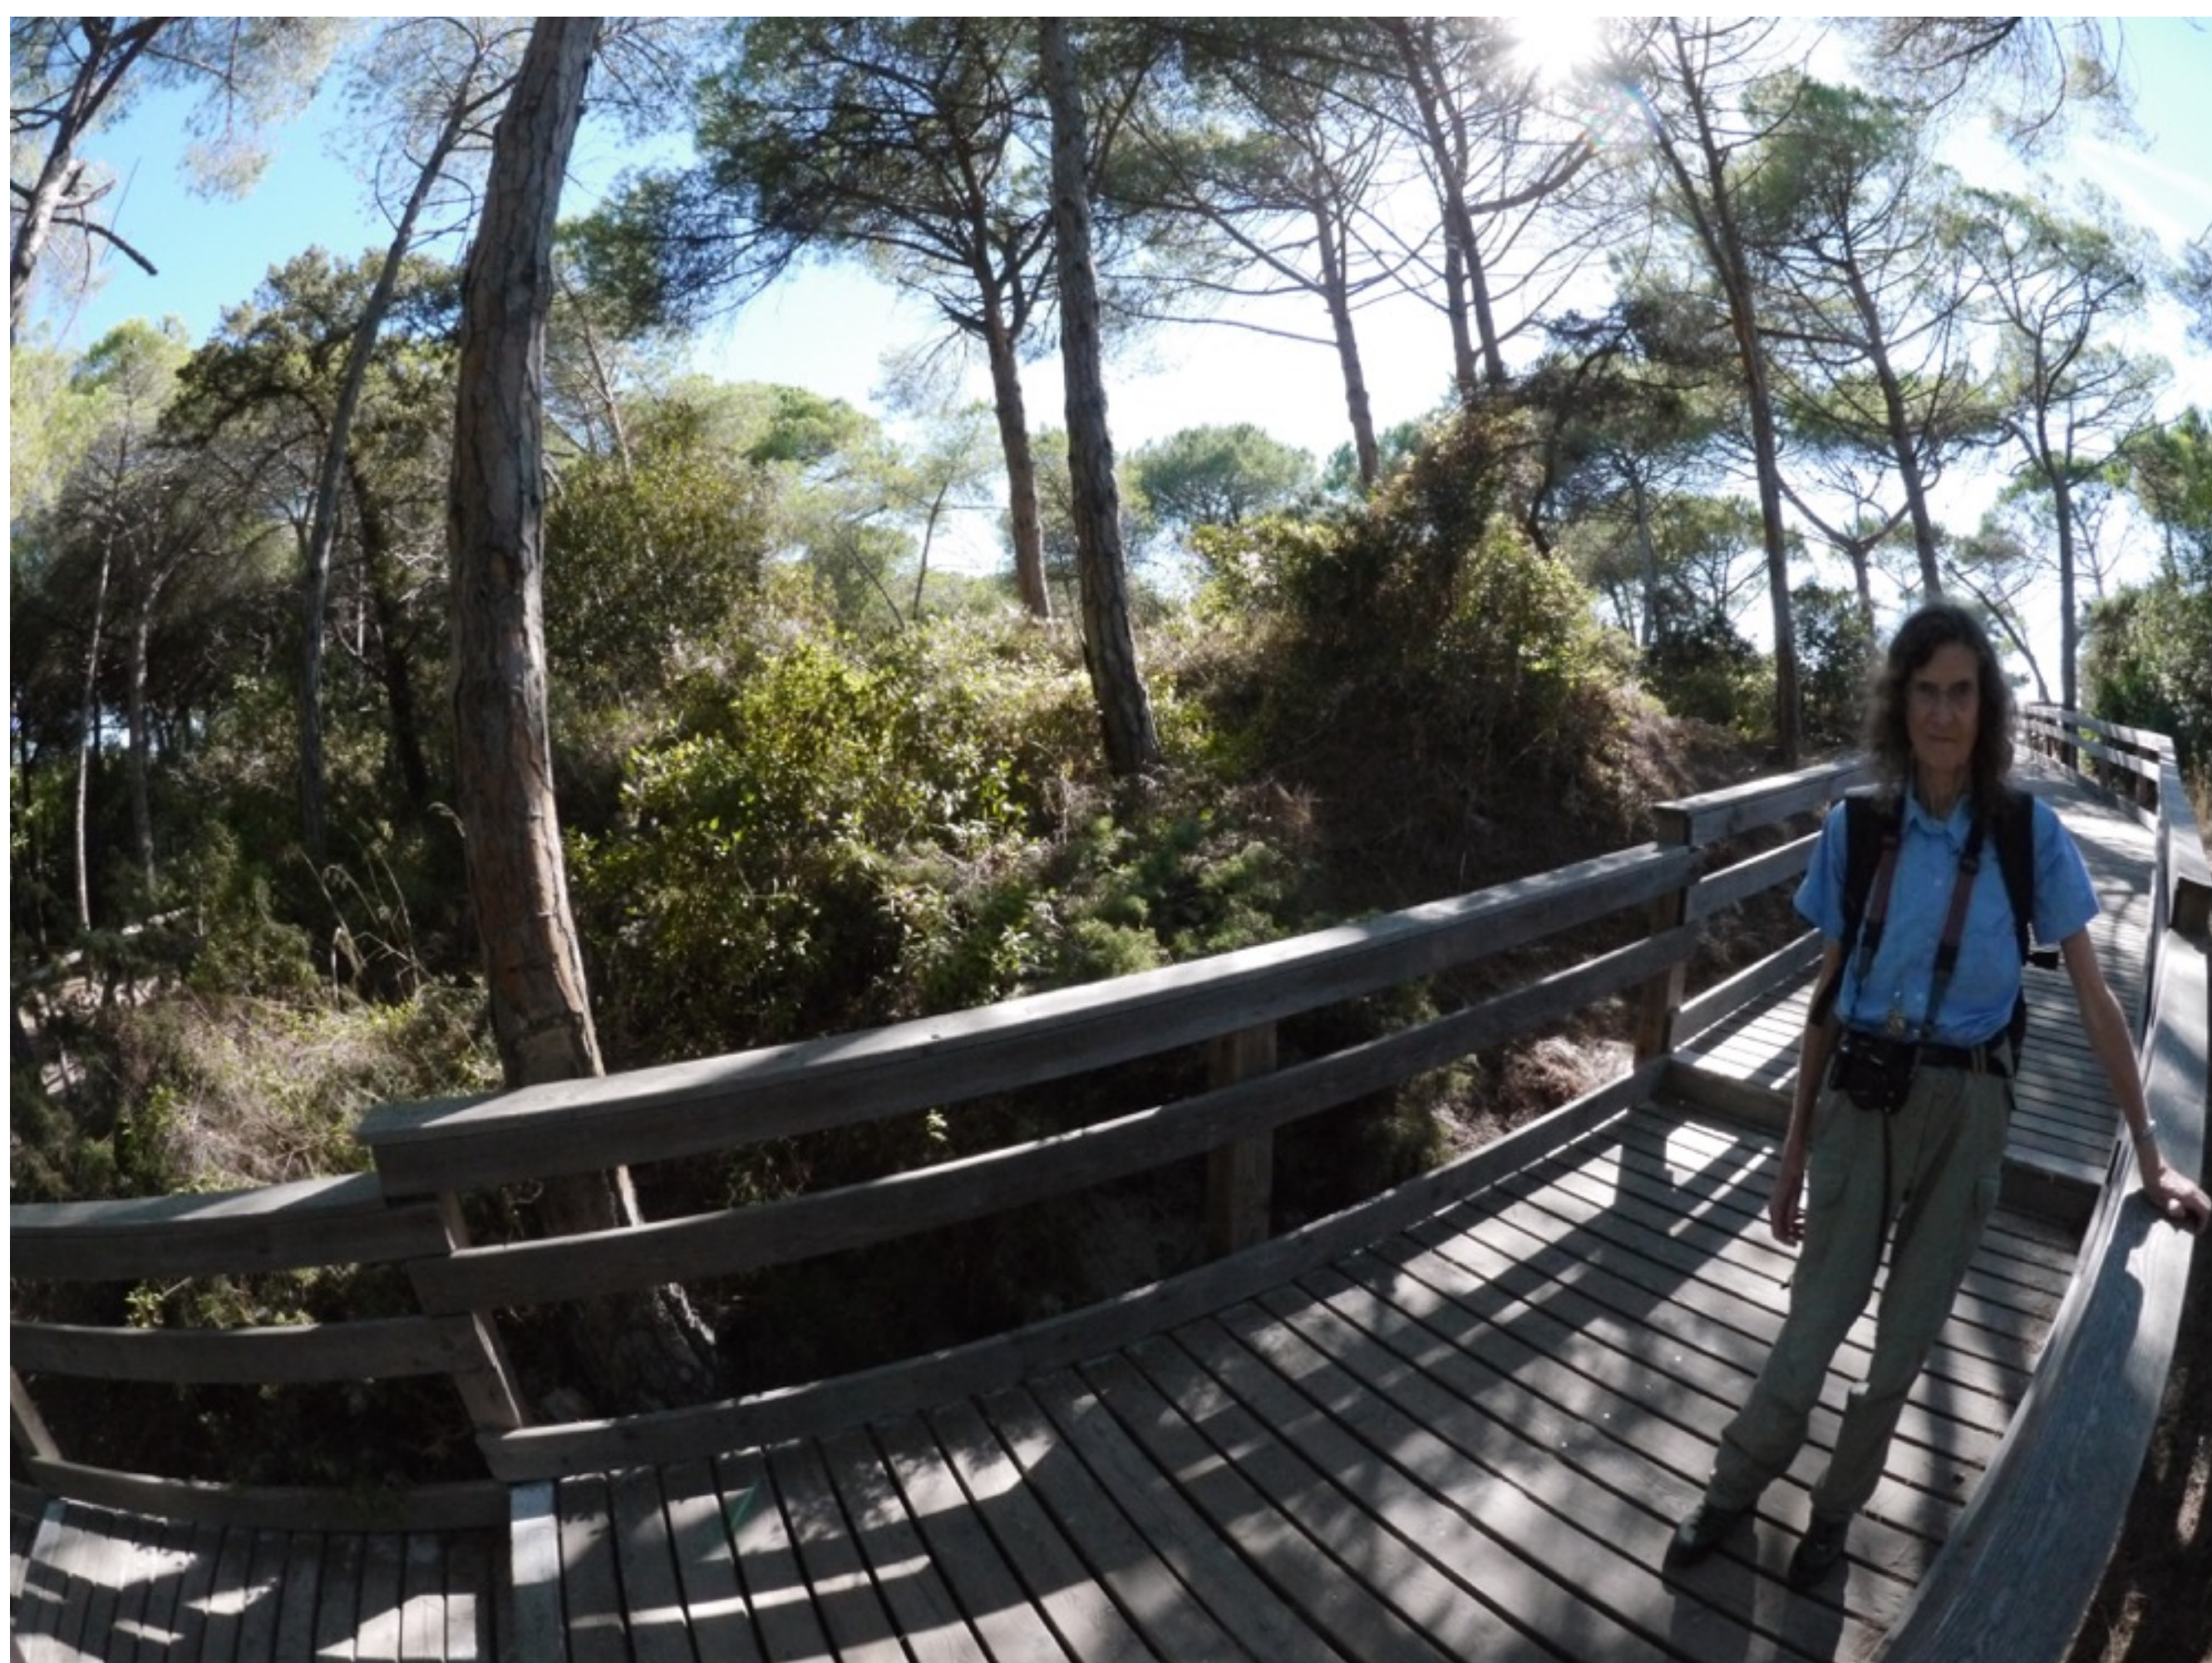

10

Supplement: Supplementary file 2 [file 1]
